# Supplementary material for: Direct introduction of a naphthalene-1,8-diamino boryl [B(dan)] group by a Pd-catalysed selective boryl transfer reaction
Source: Royal Society of Chemistry journal article supplement (doi:10.1039/c5cc00231a), 2015-01-01

## Supporting Information

### Direct introduction of naphthalene-1,8-diamino boryl [B(dan)] group by a Pd-catalysed selective boryl transfer reaction

#### Table of Contents

|                                                                 |    |
|-----------------------------------------------------------------|----|
| 1. General considerations .....                                 | 1  |
| 2. Pd-catalyzed selective boryl transfer of B(pin)-B(dan) ..... | 2  |
| 3. The application of B(dan)-containing molecules .....         | 11 |
| 4. Copies of NMR .....                                          | 15 |

## 1. General considerations

---

**General.** Unless otherwise noted, all reactions were carried out in a flame-dried, sealed Schlenk reaction tube under an atmosphere of nitrogen. Analytical thin-layer chromatography (TLC) was performed on glass plates coated with 0.25 mm 230–400 mesh silica gel containing a fluorescent indicator. Preparative thin-layer chromatography (PTLC) was performed on pre-coated, glass-backed GF254 silica gel plates. Visualization was accomplished by exposure to a UV lamp. All the products in this article are compatible with standard silica gel chromatography. Column chromatography was performed on silica gel (200–300 mesh) using standard methods.

**Structural analysis.** NMR spectra were measured on a Bruker Avance-400 spectrometer and chemical shifts ( $\delta$ ) are reported in parts per million (ppm).  $^1\text{H}$  NMR spectra were recorded at 400 MHz in NMR solvents and referenced internally to corresponding solvent resonance, and  $^{13}\text{C}$  NMR spectra were recorded at 100 MHz and referenced to corresponding solvent resonance. Carbons bearing boron substituents were generally not observed due to quadrupolar relaxation. Coupling constants are reported in Hz with multiplicities denoted as s (singlet), d (doublet), t (triplet), q (quartet), m (multiplet) and br (broad). Infrared spectra were collected on a Thermo Fisher Nicolet 6700 FT-IR spectrometer using ATR (Attenuated Total Reflectance) method. Absorption maxima ( $\nu_{\text{max}}$ ) are reported in wavenumbers ( $\text{cm}^{-1}$ ). High resolution mass spectra (HRMS) were acquired with an ESI source or APCI source.

**Materials.** Commercial reagents and solvent were purchased from J&K, Energy, Sigma-Aldrich, Alfa Aesar, Acros Organics, Strem Chemicals, TCI and used as received unless otherwise stated. B(pin)-B(dan) was synthesized according to literature.<sup>1</sup>

## 2. Pd-catalyzed selective boryl transfer of *B(pin)-B(dan)*

### A. Optimization of reaction conditions

Table S1. Optimization of reaction conditions

| Entry           | Ligand            | Base                                      | T (°C)    | t(h)      | solvent     | Yields (%) <sup>b</sup>   |
|-----------------|-------------------|-------------------------------------------|-----------|-----------|-------------|---------------------------|
| 1               | PPh <sub>3</sub>  | KOAc (3.0 eq.)                            | 80        | 12        | 1,4-dioxane | 19                        |
| 2               | <i>t</i> Bu-XPhos | KOAc (3.0 eq.)                            | 100       | 12        | 1,4-dioxane | 20                        |
| 3               | SPhos             | KOAc (3.0 eq.)                            | 100       | 12        | 1,4-dioxane | 95                        |
| 4               | XantPhos          | KOAc (3.0 eq.)                            | 100       | 12        | 1,4-dioxane | 29                        |
| 5               | XPhos             | KOAc (3.0 eq.)                            | 100       | 12        | 1,4-dioxane | 99                        |
| 6               | XPhos             | KOtBu (3.0 eq.)                           | 100       | 12        | 1,4-dioxane | Trace <sup>f</sup>        |
| 7               | XPhos             | KOAc (3.0 eq.)                            | r.t.      | 12        | 1,4-dioxane | 18                        |
| 8               | XPhos             | KOAc (3.0 eq.)                            | 50        | 12        | 1,4-dioxane | 76                        |
| 9               | <b>XPhos</b>      | <b>KOAc (3.0 eq.)</b>                     | <b>60</b> | <b>12</b> | 1,4-dioxane | <b>99(98)<sup>e</sup></b> |
| 10              | XPhos             | KOAc (3.0 eq.)                            | 60        | 8         | 1,4-dioxane | 95(92) <sup>e</sup>       |
| 11              | XPhos             | NaOAc (3.0 eq.)                           | 60        | 8         | 1,4-dioxane | N.R.                      |
| 12              | XPhos             | K <sub>2</sub> CO <sub>3</sub> (3.0 eq.)  | 60        | 8         | 1,4-dioxane | 36                        |
| 13              | XPhos             | KHCO <sub>3</sub> (3.0 eq.)               | 60        | 8         | 1,4-dioxane | 21                        |
| 14              | XPhos             | PhCOONa (3.0 eq.)                         | 60        | 8         | 1,4-dioxane | N.R.                      |
| 15              | XPhos             | Na <sub>2</sub> CO <sub>3</sub> (3.0 eq.) | 60        | 8         | 1,4-dioxane | N.R.                      |
| 16              | XPhos             | K <sub>3</sub> PO <sub>4</sub> (3.0 eq.)  | 60        | 8         | 1,4-dioxane | 65(59) <sup>e</sup>       |
| 17              | XPhos             | KOtBu (3.0 eq.)                           | 60        | 8         | 1,4-dioxane | Trace <sup>f</sup>        |
| 18              | XPhos             | KOAc (1.5 eq.)                            | 60        | 8         | 1,4-dioxane | 81(79) <sup>e</sup>       |
| 19              | XPhos             | KOAc (3.0 eq.)                            | 60        | 8         | Toluene     | 84(81) <sup>e</sup>       |
| 20              | XPhos             | KOAc (3.0 eq.)                            | 60        | 8         | DCE         | 79                        |
| 21 <sup>c</sup> | XPhos             | KOAc (3.0 eq.)                            | 60        | 12        | 1,4-dioxane | 64                        |
| 22 <sup>d</sup> | -                 | KOAc (3.0 eq.)                            | 60        | 12        | 1,4-dioxane | N.R.                      |

<sup>a</sup> Reaction conditions: 4-Bromotoluene (0.12mmol), B(pin)-B(dan) (0.10mmol), solvent (0.5 ml) under N<sub>2</sub> atmosphere. <sup>b</sup> Yields based on <sup>1</sup>H NMR analysis of the crude products with 1,3,5-trimethoxybenzene added as an internal standard. <sup>c</sup> 4 mol% Pd(OAc)<sub>2</sub> was used as catalyst. <sup>d</sup> catalyst and ligand were not added. <sup>e</sup> Isolated yield shown in parenthesis. <sup>f</sup> B(pin)-B(dan) was completely consumed according to crude <sup>1</sup>H-NMR analysis.

## B. General procedure A for Pd-catalyzed selective boryl transfer:

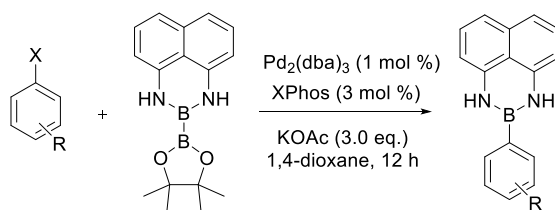

In a dried Schlenk flask (25 mL in volume) equipped with a stirring bar were placed with B(pin)-B(dan) (73.5 mg, 0.25 mmol, 1.0 eq.), Pd<sub>2</sub>(dba)<sub>3</sub> (2.3 mg, 0.0025 mmol, 1 mol %), XPhos (3.6 mg, 0.0075 mmol, 3 mol %), KOAc (73.6 mg, 0.75 mmol, 3.0 eq.) and aryl halide (0.3 mmol, 1.2 eq., if solid). After evacuation and refill with dry nitrogen for three times, aryl halide (0.3 mmol, 1.2 eq., if liquid) and 1,4-dioxane (1.0 mL) were added with syringes under a stream of nitrogen. The resulting mixture was allowed to stir at 60 °C (for aryl bromides) or 100 °C (for aryl chlorides and orth-substituted aryl bromides) for 12 h. After cooling to room temperature, the reaction mixture was filtered, concentrated and then purified by column chromatography on silica gel to give the target product.

## C. Spectra data:

### (2a) 2-(*p*-tolyl)-2,3-dihydro-1*H*-naphtho[1,8-*de*][1,3,2]diazaborinine (CAS: 1159803-47-0)<sup>2</sup>

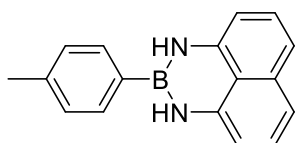

2-(*p*-tolyl)-2,3-dihydro-1*H*-naphtho[1,8-

*de*][1,3,2]diazaborinine

Chemical Formula: C<sub>17</sub>H<sub>15</sub>BN<sub>2</sub>

Exact Mass: 258.1328

Molecular Weight: 258.1310

15:1). Melting point(°C): 193.6-195.9

<sup>1</sup>H NMR (400 MHz, CDCl<sub>3</sub>) δ 7.46 (d, *J* = 7.6 Hz, 2H), 7.18 (d, *J* = 8.4 Hz, 2H), 7.06 (t, *J* = 8.0 Hz, 2H), 6.97 (d, *J* = 8.0 Hz, 2H), 6.33 (d, *J* = 7.6 Hz, 2H), 5.93 (br, 2H), 2.32 (s, 3H).

<sup>13</sup>C NMR (100 MHz, CDCl<sub>3</sub>) δ 141.29, 140.52, 136.49, 131.58, 129.17, 127.74, 119.92, 117.85, 106.08, 21.71.

HRMS (APCI) *m/z* calcd for C<sub>17</sub>H<sub>14</sub>BN<sub>2</sub> (M<sup>-</sup>): 257.1256, found: 257.1256. IR (cm<sup>-1</sup>): 3413, 1594, 1490, 1407, 1328, 1083.

The general procedure A was followed using 1-bromo-4-methylbenzene **1a** (36.9 uL, 0.3 mmol, 1.2 eq.) as starting material. **2a** was obtained as white solid (64.6 mg, quant.) after purification by silica gel flash chromatography (PE:EA = 15:1).

The general procedure A was followed using 1-chloro-4-methylbenzene **1a-Cl** (35.5 uL, 0.3 mmol, 1.2 eq.) as starting material. **2a** was obtained as white solid (52.9 mg, 82%) after purification by silica gel flash chromatography (PE:EA =

### (2b) 2-(4-methoxyphenyl)-2,3-dihydro-1*H*-naphtho[1,8-*de*][1,3,2]diazaborinine (CAS: 1159803-53-8)<sup>2</sup>

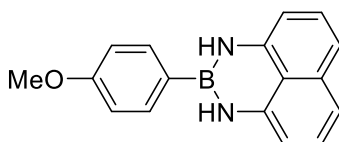

2-(4-methoxyphenyl)-2,3-dihydro-1*H*-naphtho[1,8-

*de*][1,3,2]diazaborinine

Chemical Formula: C<sub>17</sub>H<sub>15</sub>BN<sub>2</sub>O

Exact Mass: 274.1277

Molecular Weight: 274.1300

(br, 2H), 3.86 (s, 3H).

The general procedure A was followed using 1-bromo-4-methoxybenzene **1b** (37.6 uL, 0.3 mmol, 1.2 eq.) as starting material. **2b** was obtained as white solid (65.1 mg, 95%) after purification by silica gel flash chromatography (PE:EA = 10:1).

Melting point(°C): 163.2-165.5

<sup>1</sup>H NMR (400 MHz, CDCl<sub>3</sub>) δ 7.59 (d, *J* = 8.8 Hz, 2H), 7.15 (t, *J* = 8.0 Hz, 2H), 7.05 (d, *J* = 8.0 Hz, 2H), 6.98 (d, *J* = 8.4 Hz, 2H), 6.42 (d, *J* = 7.2 Hz, 2H), 5.99

$^{13}\text{C}$  NMR (100 MHz,  $\text{CDCl}_3$ )  $\delta$  161.54, 141.33, 136.48, 133.13, 127.75, 119.80, 117.81, 114.00, 106.05, 55.31.

$^{11}\text{B}$  NMR (128 MHz,  $\text{CDCl}_3$ )  $\delta$  29.1.

HRMS (APCI)  $m/z$  calcd for  $\text{C}_{17}\text{H}_{14}\text{BN}_2\text{O}$  (M $^-$ ): 273.1205, found: 273.1203.

IR ( $\text{cm}^{-1}$ ): 3407, 1594, 1495, 1407, 1224, 1181, 1029.

**(2c) 2-(4-(trifluoromethyl)phenyl)-2,3-dihydro-1H-naphtho[1,8-de][1,3,2]diazaborinine**

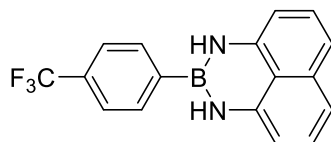

2-(4-(trifluoromethyl)phenyl)-2,3-dihydro-1  
naphtho[1,8-de][1,3,2]diazaborinine

Chemical Formula:  $\text{C}_{17}\text{H}_{12}\text{BF}_3\text{N}_2$

Exact Mass: 312.1046

Molecular Weight: 312.1022

The general procedure A was followed using 1-bromo-4-(trifluoromethyl)benzene **1c** (42.0  $\mu\text{L}$ , 0.3 mmol, 1.2 eq.) as starting material. **2c** was obtained as white solid (73.4 mg, 94%) after purification by silica gel flash chromatography (PE:EA = 20:1).

Melting point( $^{\circ}\text{C}$ ): 127.0-130.3

$^1\text{H}$  NMR (400 MHz,  $\text{CDCl}_3$ )  $\delta$  7.75 (d,  $J$  = 8.0 Hz, 2H), 7.69 (d,  $J$  = 8.0 Hz, 2H), 7.16 (t,  $J$  = 8.4 Hz, 2H), 7.09 (d,  $J$  = 7.6 Hz, 2H), 6.44 (dd,  $J$  = 7.2, 0.8 Hz, 2H), 6.01 (br, 2H).

$^{13}\text{C}$  NMR (100 MHz,  $\text{CDCl}_3$ )  $\delta$  140.76, 136.47, 132.17 (q,  $J$  = 32 Hz), 131.91, 127.79, 125.06 (q,  $J$  = 4 Hz), 124.23 (q,  $J$  = 272 Hz), 120.10, 118.40, 106.44.

$^{19}\text{F}$  NMR (377 MHz,  $\text{CDCl}_3$ ):  $\delta$  ppm -62.88.

$^{11}\text{B}$  NMR (128 MHz,  $\text{CDCl}_3$ ):  $\delta$  30.1.

HRMS (APCI)  $m/z$  calcd for  $\text{C}_{17}\text{H}_{11}\text{BF}_3\text{N}_2$  (M $^-$ ): 311.0973, found: 311.0974.

IR ( $\text{cm}^{-1}$ ): 3414, 2923, 1600, 1400, 1318, 1105, 1087, 1065, 1015.

**(2d) 4-(1H-naphtho[1,8-de][1,3,2]diazaborinin-2(3H)-yl)benzonitrile**

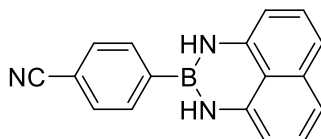

4-(1H-naphtho[1,8-de][1,3,2]diazaborinin-  
2(3H)-yl)benzonitrile

Chemical Formula:  $\text{C}_{17}\text{H}_{12}\text{BN}_3$

Exact Mass: 269.1124

Molecular Weight: 269.1140

The general procedure A was followed using 4-bromobenzonitrile **1d** (54.6 mg, 0.3 mmol, 1.2 eq.) as starting material. **2c** was obtained as white solid (62.3 mg, 97%) after purification by silica gel flash chromatography (PE:EA = 14:1).

The general procedure A was followed using 4-chlorobenzonitrile **1d-Cl** (41.3 mg, 0.3 mmol, 1.2 eq.) as starting material. **2c** was obtained as white solid (45.7 mg, 68%) after purification by silica gel flash chromatography (PE:EA = 14:1).

Melting point ( $^{\circ}\text{C}$ ): 220.4-225.1

$^1\text{H}$  NMR (400 MHz,  $\text{CDCl}_3$ )  $\delta$  7.72 (dd,  $J$  = 8.0, 3.2 Hz, 4H), 7.15 (t,  $J$  = 7.8, 2H), 7.09 (d,  $J$  = 8.0 Hz, 2H), 6.43 (d,  $J$  = 7.2 Hz, 2H), 5.99 (br, 2H).

$^{13}\text{C}$  NMR (100 MHz,  $\text{CDCl}_3$ )  $\delta$  140.56, 136.46, 132.14, 131.86, 127.79, 120.14, 118.86, 118.59, 113.86, 106.55.

$^{11}\text{B}$  NMR (128 MHz,  $\text{CDCl}_3$ )  $\delta$  28.8.

HRMS (ESI)  $m/z$  calcd for  $\text{C}_{17}\text{H}_{12}\text{BN}_3\text{Na}$  (M $^+$ ): 292.1022, found: 292.1014.

IR ( $\text{cm}^{-1}$ ): 3383, 2924, 2231, 1595, 1527, 1408, 1397, 1084.

**(2e) 2-(4-nitrophenyl)-2,3-dihydro-1H-naphtho[1,8-de][1,3,2]diazaborinine**

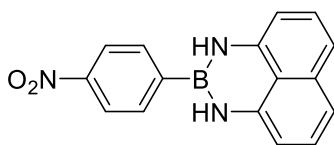

2-(4-nitrophenyl)-2,3-dihydro-1H-naphtho[1,8-de][1,3,2]diazaborinine  
Chemical Formula: C<sub>16</sub>H<sub>12</sub>BN<sub>3</sub>O<sub>2</sub>  
Exact Mass: 289.1023  
Molecular Weight: 289.1010

The general procedure A was followed using 1-bromo-4-nitrobenzene **1e** (60.6 mg, 0.3 mmol, 1.2 eq.) as starting material. **2e** was obtained as dark-red solid (70.1 mg, 97%) after purification by silica gel flash chromatography (PE:EA = 5:1).

Melting point (°C): 135.4-138.2

<sup>1</sup>H NMR (400 MHz, DMSO-*d*<sub>6</sub>) δ 8.50 (s, 2H), 8.30 (d, *J* = 8.8 Hz, 2H), 8.20 (d, *J* = 8.4 Hz, 2H), 7.11 (t, *J* = 8.0 Hz, 2H), 6.94 (d, *J* = 8.4 Hz, 2H), 6.60 (d, *J* = 7.6 Hz, 2H).

<sup>13</sup>C NMR (100 MHz, DMSO-*d*<sub>6</sub>) δ 148.59, 141.97, 135.93, 133.94, 127.69, 122.31, 119.94, 116.69, 105.91.

HRMS (APCI) *m/z* calcd for C<sub>16</sub>H<sub>11</sub>BN<sub>3</sub>O<sub>2</sub> (M<sup>-</sup>): 288.0950, found: 288.0949.

IR (cm<sup>-1</sup>): 3401, 1595, 1515, 1500, 1333, 1086.

**(2f) 4-(1H-naphtho[1,8-de][1,3,2]diazaborinin-2(3H)-yl)benzaldehyde**

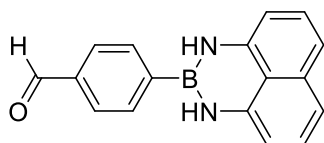

4-(1H-naphtho[1,8-de][1,3,2]diazaborinin-2(3H)-yl)benzaldehyde  
Chemical Formula: C<sub>17</sub>H<sub>13</sub>BN<sub>2</sub>O  
Exact Mass: 272.1121  
Molecular Weight: 272.1140

The general procedure A was followed using 4-bromobenzaldehyde **1f** (55.5 mg, 0.3 mmol, 1.2 eq.) as starting material. **2f** was obtained as white solid (57.1 mg, 84%) after purification by silica gel flash chromatography (PE:EA = 3:1).

Melting point (°C): > 250

<sup>1</sup>H NMR (400 MHz, Acetone-*d*<sub>6</sub>) δ 10.08 (s, 1H), 8.07 (d, *J* = 8.0 Hz, 2H), 7.94 (d, *J* = 8.0 Hz, 2H), 7.80 (s, 2H), 7.11 (t, *J* = 7.8 Hz, 2H), 7.01 (d, *J* = 8.4 Hz, 2H), 6.62 (d, *J* = 7.2 Hz, 2H).

<sup>13</sup>C NMR (100 MHz, Acetone-*d*<sub>6</sub>) δ 193.14, 142.87, 138.57, 137.44, 133.70, 129.46, 128.49, 121.25, 118.12, 106.99.

<sup>11</sup>B NMR (128 MHz, CDCl<sub>3</sub>) δ 29.7.

HRMS (APCI) *m/z* calcd for C<sub>17</sub>H<sub>12</sub>BN<sub>2</sub>O (M<sup>-</sup>): 271.1038, found: 271.1052.

IR (cm<sup>-1</sup>): 3382, 1666, 1592, 1522, 1406, 1172, 1086.

**(2g) 4-(1H-naphtho[1,8-de][1,3,2]diazaborinin-2(3H)-yl)phenol (CAS: 1492899-94-1)<sup>3</sup>**

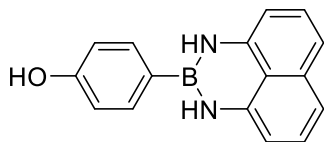

4-(1H-naphtho[1,8-de][1,3,2]diazaborinin-2(3H)-yl)phenol  
Chemical Formula: C<sub>16</sub>H<sub>13</sub>BN<sub>2</sub>O  
Exact Mass: 260.1121  
Molecular Weight: 260.1030

The general procedure A was followed using 4-bromophenol **1g** (51.9 mg, 0.3 mmol, 1.2 eq.) as starting material. **2g** was obtained as white solid (65.0 mg, quant.) after purification by silica gel flash chromatography (PE:EA = 3:1).

Melting point (°C): 222.6-225.7

<sup>1</sup>H NMR (400 MHz, CDCl<sub>3</sub>) δ 7.55 (d, *J* = 8.0 Hz, 2H), 7.14 (t, *J* = 7.8 Hz, 2H), 7.05 (d, *J* = 8.4 Hz, 2H), 6.91 (d, *J* = 8.4 Hz, 2H), 6.41 (d, *J* = 7.6 Hz, 2H), 5.98 (br, 2H).

<sup>13</sup>C NMR (100 MHz, CDCl<sub>3</sub>) δ 157.76, 141.49, 136.68, 133.59,

127.96, 120.01, 118.05, 115.65, 106.27.

HRMS (APCI) *m/z* calcd for C<sub>16</sub>H<sub>12</sub>BN<sub>2</sub>O (M<sup>-</sup>): 259.1048, found: 259.1049.

IR (cm<sup>-1</sup>): 3523, 3398, 2923, 1595, 1489, 1405, 1210, 1175, 1083.

**(2h) 4-(1*H*-naphtho[1,8-*de*][1,3,2]diazaborinin-2(3*H*)-yl)aniline**

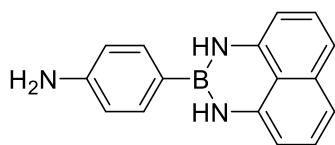

4-(1*H*-naphtho[1,8-*de*][1,3,2]diazaborinin-2(3*H*)-yl)aniline

Chemical Formula: C<sub>16</sub>H<sub>14</sub>BN<sub>3</sub>

Exact Mass: 259.1281

Molecular Weight: 259.1190

127.62, 119.59, 117.48, 114.67, 105.79.

<sup>11</sup>B NMR (128 MHz, CDCl<sub>3</sub>) δ 30.0.

HRMS (APCI) *m/z* calcd for C<sub>16</sub>H<sub>12</sub>BN<sub>2</sub>O (M<sup>-</sup>): 258.1208, found: 258.1208.

IR (cm<sup>-1</sup>): 3417, 3331, 2954, 2922, 2853, 1593, 1492, 1405, 1226, 1086.

The general procedure A was followed using 4-bromo aniline **1h** (51.6 mg, 0.3 mmol, 1.2 eq.) as starting material. **2h** was obtained as yellow solid (54.4 mg, 84%) after purification by silica gel flash chromatography (PE:EA = 2:1).

Melting point (°C): 230.1-236.5

<sup>1</sup>H NMR (400 MHz, CDCl<sub>3</sub>) δ 7.46 (d, *J* = 8.0 Hz, 2H), 7.12 (t, *J* = 7.2 Hz, 2H), 7.03 (d, *J* = 8.0 Hz, 2H), 6.74 (d, *J* = 8.4 Hz, 2H), 6.39 (d, *J* = 7.2 Hz, 2H), 5.97 (br, 2H), 3.84 (br, 2H).

<sup>13</sup>C NMR (100 MHz, CDCl<sub>3</sub>) δ 148.51, 141.37, 136.35, 132.91,

**(2i) 2-(3-methoxyphenyl)-2,3-dihydro-1*H*-naphtho[1,8-*de*][1,3,2]diazaborinine**

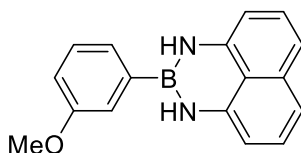

2-(3-methoxyphenyl)-2,3-dihydro-1*H*-naphtho[1,8-*de*][1,3,2]diazaborinine

Chemical Formula: C<sub>17</sub>H<sub>15</sub>BN<sub>2</sub>O

Exact Mass: 274.1277

Molecular Weight: 274.1300

flash chromatography (PE:EA = 15:1).

Melting point (°C): 113.7-116.4

<sup>1</sup>H NMR (400 MHz, CDCl<sub>3</sub>) δ 7.38 (t, *J* = 7.6 Hz, 1H), 7.23 (d, *J* = 7.2 Hz, 1H), 7.16-7.13 (m, 3H), 7.06 (d, *J* = 8.0 Hz, 2H), 7.01 (ddd, *J* = 8.4, 2.8, 0.8 Hz, 1H), 6.42 (d, *J* = 7.2 Hz, 2H), 6.01 (br, 2H), 3.87 (s, 3H).

<sup>13</sup>C NMR (100 MHz, CDCl<sub>3</sub>) δ 159.62, 141.17, 136.47, 129.69, 127.77, 123.87, 120.03, 118.01, 117.11, 115.64, 106.18, 55.42.

<sup>11</sup>B NMR (128 MHz, CDCl<sub>3</sub>) δ 30.1.

HRMS (APCI) *m/z* calcd for C<sub>17</sub>H<sub>14</sub>BN<sub>2</sub>O (M<sup>-</sup>): 273.1205, found: 273.1207.

IR (cm<sup>-1</sup>): 3453, 3411, 1594, 1418, 1407, 1244, 1041.

The general procedure A was followed using 1-bromo-3-methoxybenzene **1i** (37.7 uL, 0.3 mmol, 1.2 eq.) as starting material. **2i** was obtained as white solid (63.7 mg, 93%) after purification by silica gel flash chromatography (PE:EA = 15:1).

The general procedure A was followed using 1-chloro-3-methoxybenzene **1i-Cl** (37.6 uL, 0.3 mmol, 1.2 eq.) as starting material. **2i** was obtained as white solid (59.6 mg, 87%) after purification by silica gel

**(2j) 3-(1*H*-naphtho[1,8-*de*][1,3,2]diazaborinin-2(3*H*)-yl)benzonitrile (CAS: 1352304-46-1)<sup>5</sup>**

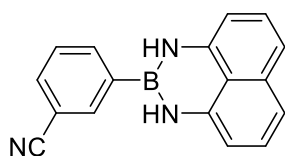

3-(1*H*-naphtho[1,8-*de*][1,3,2]diazaborinin-2(3*H*)-yl)benzonitrile

Chemical Formula: C<sub>17</sub>H<sub>12</sub>BN<sub>3</sub>

Exact Mass: 269.1124

Molecular Weight: 269.1140

The general procedure A was followed using 3-bromobenzonitrile **1j** (54.6 mg, 0.3 mmol, 1.2 eq.) as starting material. **2j** was obtained as white solid (57.8 mg, 86%) after purification by silica gel flash chromatography (PE:EA = 7:1).

Melting point (°C): 228.6-233.5

<sup>1</sup>H NMR (400 MHz, CDCl<sub>3</sub>) δ 7.93 (s, 1H), 7.86 (d, *J* = 7.6 Hz, 1H), 7.75 (d, *J* = 7.6 Hz, 1H), 7.55 (t, *J* = 7.6 Hz, 1H), 7.16 (t, *J* = 7.8 Hz, 2H), 7.09 (d, *J* = 8.4 Hz, 2H), 6.44 (d, *J* = 7.2 Hz, 2H), 6.00 (br, 2H).

$^{13}\text{C}$  NMR (100 MHz,  $\text{CDCl}_3$ )  $\delta$  140.56, 136.44, 135.72, 135.30, 133.61, 129.11, 127.79, 120.09, 118.98, 118.57, 112.78, 106.56.

HRMS (APCI)  $m/z$  calcd for  $\text{C}_{17}\text{H}_{11}\text{BN}_3$  (M $^-$ ): 268.1052, found: 268.1048.

IR ( $\text{cm}^{-1}$ ): 3399, 2222, 1595, 1407, 1160, 1083.

**(2k) 2-(*m*-tolyl)-2,3-dihydro-1*H*-naphtho[1,8-*de*][1,3,2]diazaborinine**

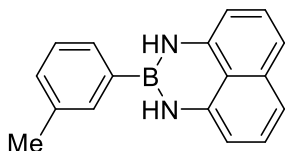

2-(*m*-tolyl)-2,3-dihydro-1*H*-naphtho[1,8-*de*][1,3,2]diazaborinine

Chemical Formula:  $\text{C}_{17}\text{H}_{15}\text{BN}_2$

Exact Mass: 258.1328

Molecular Weight: 258.1310

The general procedure A was followed using 1-bromo-3-methylbenzene **1k** (36.4  $\mu\text{L}$ , 0.3 mmol, 1.2 eq.) as starting material. **2k** was obtained as white solid (62.6 mg, 97%) after purification by silica gel flash chromatography (PE:EA = 20:1).

Melting point ( $^{\circ}\text{C}$ ): 103.8-106.3

$^1\text{H}$  NMR (400 MHz,  $\text{CDCl}_3$ )  $\delta$  7.46 (d,  $J$  = 8.0 Hz, 2H), 7.35 (t,  $J$  = 7.2 Hz, 1H), 7.30 (d,  $J$  = 7.6 Hz, 1H), 7.15 (t,  $J$  = 8.0 Hz, 2H), 7.06 (d,  $J$  = 8.0 Hz, 2H), 6.42 (d,  $J$  = 7.6 Hz, 2H), 6.03 (br, 2H),

2.43 (s, 3H).

$^{13}\text{C}$  NMR (100 MHz,  $\text{CDCl}_3$ )  $\delta$  141.27, 137.82, 136.50, 132.29, 131.19, 128.61, 128.35, 127.76, 119.99, 117.91, 106.12, 21.66.

$^{11}\text{B}$  NMR (128 MHz,  $\text{CDCl}_3$ )  $\delta$  30.4.

HRMS (APCI)  $m/z$  calcd for  $\text{C}_{17}\text{H}_{14}\text{BN}_2$  (M $^-$ ): 257.1256, found: 257.1257.

IR ( $\text{cm}^{-1}$ ): 3410, 1593, 1409, 1372, 1084.

**(2l) 2-(3-vinylphenyl)-2,3-dihydro-1*H*-naphtho[1,8-*de*][1,3,2]diazaborinine**

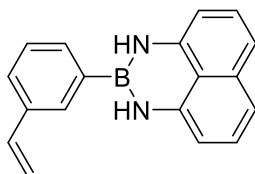

2-(3-vinylphenyl)-2,3-dihydro-1*H*-naphtho[1,8-*de*][1,3,2]diazaborinine

Chemical Formula:  $\text{C}_{18}\text{H}_{15}\text{BN}_2$

Exact Mass: 270.1328

Molecular Weight: 270.1420

The general procedure A was followed using 1-bromonaphthalene **1l** (54.9 mg, 0.3 mmol, 1.2 eq.) as starting material. **2l** was obtained as white solid (61.4 mg, 91%) after purification by silica gel flash chromatography (PE:EA = 20:1).

Melting point ( $^{\circ}\text{C}$ ): 86.3-87.9

$^1\text{H}$  NMR (400 MHz,  $\text{CDCl}_3$ )  $\delta$  7.66 (s, 1H), 7.54 (dd,  $J$  = 7.6, 1.2 Hz, 2H), 7.42 (t,  $J$  = 7.6 Hz 1H), 7.15 (t,  $J$  = 8.4 Hz 2H), 7.07 (d,  $J$  = 8.0 Hz, 2H), 6.79 (dd,  $J$  = 17.6, 10.8 Hz, 1H), 6.43 (dd,  $J$  = 7.2, 0.8 Hz, 2H), 6.04 (br, 2H), 5.83 (d,  $J$  = 17.6 Hz, 1H), 5.32 (d,  $J$  = 10.8 Hz, 1H).

$^{13}\text{C}$  NMR (100 MHz,  $\text{CDCl}_3$ )  $\delta$  141.03, 137.35, 136.77, 136.36, 130.90, 129.47, 128.50, 127.93, 127.65, 119.88, 117.89, 114.35, 106.07.

$^{11}\text{B}$  NMR (128 MHz,  $\text{CDCl}_3$ )  $\delta$  29.9.

HRMS (APCI)  $m/z$  calcd for  $\text{C}_{18}\text{H}_{14}\text{BN}_2$  (M $^-$ ): 269.1256, found: 269.1257.

IR ( $\text{cm}^{-1}$ ): 3413, 2925, 1596, 1409, 1305, 1129.



**(2m) methyl 2-(1*H*-naphtho[1,8-*de*][1,3,2]diazaborinin-2(3*H*)-yl)benzoate**

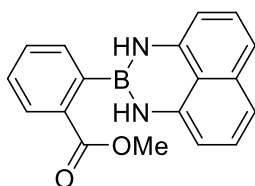

methyl 2-(1*H*-naphtho[1,8-*de*][1,3,2]diazaborinin-2(3*H*)-yl)benzoate

Chemical Formula: C<sub>18</sub>H<sub>15</sub>BN<sub>2</sub>O<sub>2</sub>

Exact Mass: 302.1227

Molecular Weight: 302.1400

The general procedure A was followed using methyl 2-bromobenzoate **1m** (64.5 mg 0.3 mmol, 1.2 eq.) as starting material. **2m** was obtained as white solid (58.2 mg, 77%) after purification by silica gel flash chromatography (PE:EA = 14:1).

Melting point (°C): 160.3-164.5

<sup>1</sup>H NMR (400 MHz, CDCl<sub>3</sub>) δ 8.04 (d, *J* = 8.0 Hz, 1H), 7.59-7.55 (m, 2H), 7.49-7.46 (m, 1H), 7.12 (t, *J* = 8.0 Hz, 2H), 7.04 (d, *J* = 8.0 Hz, 2H), 6.32 (d, *J* = 7.2 Hz, 2H), 5.73 (br, 2H), 3.86 (s, 3H).

<sup>13</sup>C NMR (100 MHz, CDCl<sub>3</sub>) δ 168.44, 141.40, 136.57, 133.33, 132.84, 132.20, 129.71, 129.01, 127.68, 119.78, 117.70, 105.92, 52.49.

<sup>11</sup>B NMR (128 MHz, CDCl<sub>3</sub>) δ 31.0.

HRMS (APCI) *m/z* calcd for C<sub>18</sub>H<sub>14</sub>BN<sub>2</sub>O<sub>2</sub> (M<sup>-</sup>): 301.1154, found: 301.1157.

IR (cm<sup>-1</sup>): 3381, 1706, 1600, 1515, 1269, 1069.

**(2n) 2-(*o*-tolyl)-2,3-dihydro-1*H*-naphtho[1,8-*de*][1,3,2]diazaborinine**

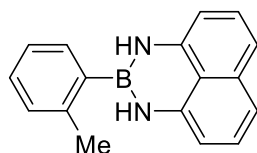

2-(*o*-tolyl)-2,3-dihydro-1*H*-naphtho[1,8-*de*][1,3,2]diazaborinine

Chemical Formula: C<sub>17</sub>H<sub>15</sub>BN<sub>2</sub>

Exact Mass: 258.1328

Molecular Weight: 258.1310

The general procedure A was followed using 1-bromo-2-methylbenzene **1n** (36.1 uL, 0.3 mmol, 1.2 eq.) as starting material. **2n** was obtained as white solid (58.7 mg, 91%) after purification by silica gel flash chromatography (PE:EA = 20:1).

Melting point (°C): 73.2-75.1

<sup>1</sup>H NMR (400 MHz, CDCl<sub>3</sub>) δ 7.38-7.36 (m, 1H), 7.25-7.22 (m, 1H), 7.15-7.12 (m, 2H), 7.05 (t, *J* = 8.4 Hz, 2H), 6.97 (d, *J* = 8.4 Hz, 2H), 6.26 (dd, *J* = 7.2, 0.8 Hz, 2H), 5.74 (br, 2H), 2.41 (s, 3H).

<sup>13</sup>C NMR (100 MHz, CDCl<sub>3</sub>) δ 141.21, 140.76, 136.48, 132.36, 129.81, 129.44, 127.74, 125.41, 119.89, 117.95, 106.03, 22.52.

<sup>11</sup>B NMR (128 MHz, CDCl<sub>3</sub>) δ 30.0.

HRMS (APCI) *m/z* calcd for C<sub>17</sub>H<sub>14</sub>BN<sub>2</sub> (M<sup>-</sup>): 257.1256, found: 257.1257.

IR (cm<sup>-1</sup>): 3420, 3405, 1599, 1506, 1407, 1319, 1079.

**(2o) 2-([1,1'-biphenyl]-2-yl)-2,3-dihydro-1*H*-naphtho[1,8-*de*][1,3,2]diazaborinine**

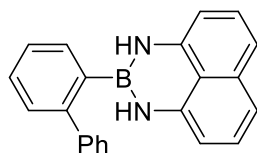

2-([1,1'-biphenyl]-2-yl)-2,3-dihydro-1*H*-naphtho[1,8-*de*][1,3,2]diazaborinine

Chemical Formula: C<sub>22</sub>H<sub>17</sub>BN<sub>2</sub>

Exact Mass: 320.1485

Molecular Weight: 320.2020

The general procedure A was followed using 2-bromo-1,1'-biphenyl **1o** (69.9 mg, 0.3 mmol, 1.2 eq.) as starting material. **2o** was obtained as white solid (55.2 mg, 69%) after purification by silica gel flash chromatography (PE:EA = 20:1).

Melting point (°C): 97.7-99.4

<sup>1</sup>H NMR (400 MHz, CDCl<sub>3</sub>) δ 7.67 (d, *J* = 7.6 Hz, 1H), 7.54-7.32 (m, 8H), 7.06 (t, *J* = 8.4 Hz, 2H), 6.99 (d, *J* = 8.0 Hz, 2H), 6.11 (d, *J* = 7.2 Hz, 2H), 5.47 (br, 2H).

<sup>13</sup>C NMR (100 MHz, CDCl<sub>3</sub>) δ 146.42, 142.67, 141.07, 136.21,

132.77, 129.70, 129.42, 129.09, 128.38, 127.56, 127.46, 126.93, 119.47, 117.52, 105.75.

<sup>11</sup>B NMR (128 MHz, CDCl<sub>3</sub>) δ 29.9.

HRMS (APCI) *m/z* calcd for C<sub>22</sub>H<sub>16</sub>BN<sub>2</sub> (M<sup>-</sup>): 319.1412, found: 319.1416.

IR (cm<sup>-1</sup>): 3416, 1596, 1507, 1404, 1329, 1082. (**2p**)

**2-(naphthalen-1-yl)-2,3-dihydro-1H-naphtho[1,8-de][1,3,2]diazaborinine**

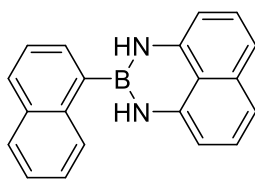

2-(naphthalen-1-yl)-2,3-dihydro-1H-naphtho[1,8-de][1,3,2]diazaborinine

Chemical Formula: C<sub>20</sub>H<sub>15</sub>BN<sub>2</sub>

Exact Mass: 294.1328

Molecular Weight: 294.1640

The general procedure A was followed using 1-bromonaphthalene **1p** (62.1 mg, 0.3 mmol, 1.2 eq.) as starting material. **2p** was obtained as white solid (66.9 mg, 91%) after purification by silica gel flash chromatography (PE:EA = 30:1).

Melting point (°C): 140.2-143.6

<sup>1</sup>H NMR (400 MHz, CDCl<sub>3</sub>) δ 8.20 (dd, *J* = 6.4, 3.2 Hz, 1H), 7.92-7.89 (m, 2H), 7.70 (d, *J* = 6.4 Hz, 1H), 7.53-7.50 (m, 3H), 7.17 (t, *J* = 8.0 Hz, 2H), 7.11 (d, *J* = 8.0 Hz, 2H), 6.38 (d, *J* = 7.2 Hz, 2H), 6.02 (br, 2H).

<sup>13</sup>C NMR (100 MHz, CDCl<sub>3</sub>) δ 141.23, 136.55, 135.54, 133.41,

130.79, 129.65, 128.91, 128.03, 127.79, 126.36, 125.97, 125.52, 120.09, 118.12, 106.17.

<sup>11</sup>B NMR (128 MHz, CDCl<sub>3</sub>) δ 30.7.

HRMS (ESI) *m/z* calcd for C<sub>20</sub>H<sub>16</sub>BN<sub>2</sub> (M<sup>+</sup>): 295.1407, found: 295.1399.

IR (cm<sup>-1</sup>): 3420, 3402, 1594, 1508, 1498, 1315, 1167.

**(2q) 2-(benzo[d][1,3]dioxol-5-yl)-2,3-dihydro-1H-naphtho[1,8-de][1,3,2]diazaborinine**

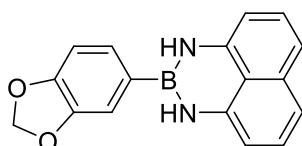

2-(benzo[d][1,3]dioxol-5-yl)-2,3-dihydro-1H-naphtho[1,8-de][1,3,2]diazaborinine

Chemical Formula: C<sub>17</sub>H<sub>13</sub>BN<sub>2</sub>O<sub>2</sub>

Exact Mass: 288.1070

Molecular Weight: 288.1130

The general procedure A was followed using 5-bromobenzo[d][1,3]dioxole **1q** (60.3 mg, 0.3 mmol, 1.2 eq.) as starting material. **2q** was obtained as white solid (69.0 mg, 93%) after purification by silica gel flash chromatography (PE:EA = 15:1).

The general procedure A was followed using benzo[d][1,3]dioxol-5-yl trifluoromethanesulfonate **1q-OTf** (81.1 mg, 0.3 mmol, 1.2 eq.) as starting material. **2q** was obtained as white solid (69.9 mg, 97%) after purification by

silica gel flash chromatography (PE:EA = 15:1).

Melting point (°C): 173.5-175.8

<sup>1</sup>H NMR (400 MHz, CDCl<sub>3</sub>) δ 7.16-7.12 (m, 3H), 7.06 (t, *J* = 8.4 Hz, 3H), 6.91 (d, *J* = 7.6 Hz, 1H), 6.41 (d, *J* = 7.2 Hz, 2H), 6.00 (s, 2H), 5.94 (br, 2H).

<sup>13</sup>C NMR (100 MHz, CDCl<sub>3</sub>) δ 149.53, 147.95, 141.19, 136.47, 127.75, 125.90, 119.83, 117.92, 111.04, 108.90, 106.12, 101.06.

<sup>11</sup>B NMR (128 MHz, CDCl<sub>3</sub>) δ 29.7.

HRMS (ESI) *m/z* calcd for C<sub>17</sub>H<sub>14</sub>BN<sub>2</sub>O<sub>2</sub> (M<sup>+</sup>): 289.1148, found: 289.1147.

IR (cm<sup>-1</sup>): 3399, 1594, 1478, 1402, 1232, 1034.

**(2r) 2-(6-methoxypyridin-2-yl)-2,3-dihydro-1H-naphtho[1,8-de][1,3,2]diazaborinine**

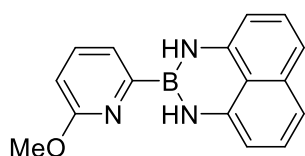

2-(6-methoxypyridin-2-yl)-2,3-dihydro-1H-naphtho[1,8-de][1,3,2]diazaborinine

Chemical Formula: C<sub>16</sub>H<sub>14</sub>BN<sub>3</sub>O

Exact Mass: 275.1230

Molecular Weight: 275.1180

The general procedure A was followed using 2-bromo-6-methoxypyridine **1r** (36.9 uL, 0.3 mmol, 1.2 eq.) as starting material. **2r** was obtained as white solid (62.6 mg, 91%) after purification by silica gel flash chromatography (PE:Acetone = 20:1).

The general procedure A was followed using 2-chloro-6-methoxypyridine **1r-Cl** (35.7 uL, 0.3 mmol, 1.2 eq.) as starting material. **2r** was obtained as white solid (37.8 mg, 55%)

after purification by silica gel flash chromatography (PE:Acetone = 20:1).

Melting point (°C): 142.3-144.9

<sup>1</sup>H NMR (400 MHz, CDCl<sub>3</sub>) δ 7.61 (dd, *J* = 8.4, 7.2 Hz, 1H), 7.24 (d, *J* = 7.2 Hz, 1H), 7.15 (t, *J* = 8.0 Hz, 2H), 7.05 (d, *J* = 8.0 Hz, 2H), 6.81 (d, *J* = 8.4 Hz, 1H), 6.47-6.44 (m, 4H), 4.05 (s, 3H).

<sup>13</sup>C NMR (100 MHz, CDCl<sub>3</sub>) δ 163.97, 141.18, 137.73, 136.63, 127.76, 120.49, 117.97, 112.45, 106.26, 53.38.

<sup>11</sup>B NMR (128 MHz, CDCl<sub>3</sub>) δ 27.6.

HRMS (APCI) *m/z* calcd for C<sub>16</sub>H<sub>13</sub>BN<sub>3</sub>O (M<sup>-</sup>): 274.1157, found: 274.1157.

IR (cm<sup>-1</sup>): 3419, 1595, 1454, 1407, 1308, 1033, 1010.

**(2s) 2-(thiophen-2-yl)-2,3-dihydro-1*H*-naphtho[1,8-*de*][1,3,2]diazaborinine (CAS: 1159803-80-1)<sup>4</sup>**

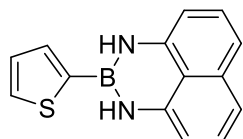

2-(thiophen-2-yl)-2,3-dihydro-1*H*-  
naphtho[1,8-*de*][1,3,2]diazaborinine

Chemical Formula: C<sub>14</sub>H<sub>11</sub>BN<sub>2</sub>S

Exact Mass: 250.0736

Molecular Weight: 250.1260

The general procedure A was followed using 2-chlorothiophene **1s-Cl** (27.7 uL, 0.3 mmol, 1.2 eq.) as starting material. **2s** was obtained as white solid (31.9 mg, 51%) after purification by silica gel flash chromatography (PE:EA = 20:1).

Melting point (°C): 78.6-80.3

<sup>1</sup>H NMR (400 MHz, CDCl<sub>3</sub>) δ 7.61 (d, *J* = 4.8 Hz, 1H), 7.50 (d, *J* = 3.2 Hz, 1H), 7.26-7.24 (m, 1H), 7.14 (t, *J* = 8.0 Hz, 2H), 7.06 (d, *J* = 8.0 Hz, 2H), 6.41 (d, *J* = 7.2 Hz, 2H), 5.97 (br, 2H).

<sup>13</sup>C NMR (100 MHz, CDCl<sub>3</sub>) δ 140.86, 136.46, 132.98, 130.24,

128.70, 127.73, 119.91, 118.14, 106.28.

HRMS (APCI) *m/z* calcd for C<sub>14</sub>H<sub>10</sub>BNS (M<sup>-</sup>): 249.0663, found: 249.0664.

IR (cm<sup>-1</sup>): 3400, 1595, 1523, 1399, 1232.

**(2t) 2-(1*H*-indol-5-yl)-2,3-dihydro-1*H*-naphtho[1,8-*de*][1,3,2]diazaborinine**

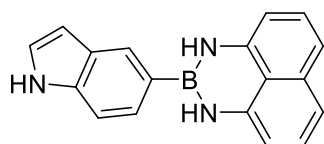

2-(1*H*-indol-5-yl)-2,3-dihydro-1*H*-  
naphtho[1,8-*de*][1,3,2]diazaborinine

Chemical Formula: C<sub>18</sub>H<sub>14</sub>BN<sub>3</sub>

Exact Mass: 283.1281

Molecular Weight: 283.1410

The general procedure A was followed using 5-Bromoindole **1t** (58.8 mg, 0.3 mmol, 1.2 eq.) as starting material. **2t** was obtained as white solid (47.8 mg, 68%) after purification by silica gel flash chromatography (PE:EA = 4:1).

Melting point (°C): 170.4-174.1

<sup>1</sup>H NMR (400 MHz, CDCl<sub>3</sub>) δ 8.23 (br, 1H), 8.00 (s, 1H), 7.48 (s, 2H), 7.25 (s, 1H), 7.16 (t, *J* = 7.6 Hz, 2H), 7.06 (d, *J* = 8.4 Hz, 2H), 6.63 (t, *J* = 2.4 Hz, 1H), 6.44 (d, *J* = 7.2 Hz, 2H), 6.12 (br, 2H).

<sup>13</sup>C NMR (100 MHz, CDCl<sub>3</sub>) δ 141.62, 137.31, 136.53, 128.10,

127.78, 125.10, 124.77, 124.71, 119.82, 117.63, 111.19, 105.97, 103.10.

<sup>11</sup>B NMR (128 MHz, CDCl<sub>3</sub>) δ 30.4.

HRMS (APCI) *m/z* calcd for C<sub>18</sub>H<sub>13</sub>BN<sub>3</sub> (M<sup>-</sup>): 282.1208, found: 282.1211.

IR (cm<sup>-1</sup>): 3407, 3362, 1592, 1406, 1328, 1163, 1075.

### 3. The application of B(dan)-containing molecules

**(3a)(E)-2-(4-(2-(4,4,5,5-tetramethyl-1,3,2-dioxaborolan-2-yl)vinyl)phenyl)-2,3-dihydro-1H-naphtho[1,8-de][1,3,2]diazaborinine**

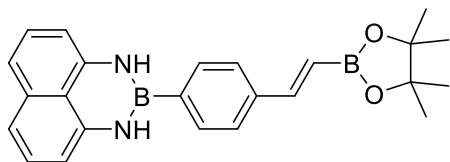

(E)-2-(4-(2-(4,4,5,5-tetramethyl-1,3,2-dioxaborolan-2-yl)vinyl)phenyl)-2,3-dihydro-1H-naphtho[1,8-de][1,3,2]diazaborinine

Chemical Formula:  $C_{24}H_{26}B_2N_2O_2$

Exact Mass: 396.2180

Molecular Weight: 396.1040

The general procedure A was followed using (E)-2-(4-chlorostyryl)-4,4,5,5-tetramethyl-1,3,2-dioxaborolane (79.4 mg, 0.3 mmol, 1.2 eq.) as starting material. **3a** was obtained as white solid (79.2 mg, 80%) after purification by silica gel flash chromatography (PE:EA = 10:1).

Melting point ( $^{\circ}C$ ): 200.5-203.8

$^1H$  NMR (400 MHz,  $CDCl_3$ )  $\delta$  7.63 (d,  $J$  = 8.0 Hz, 2H), 7.55 (d,  $J$  = 8.0 Hz, 2H), 7.43 (d,  $J$  = 18.4 Hz, 1H), 7.14 (t,  $J$  = 8.0 Hz, 2H), 7.06 (d,  $J$  = 8.0 Hz, 2H), 6.41 (d,  $J$  = 7.2 Hz, 2H), 6.26 (d,  $J$  = 18.4 Hz, 1H), 6.02 (br, 2H), 1.33 (s, 12H).

$^{13}C$  NMR (100 MHz,  $CDCl_3$ )  $\delta$  149.06, 141.01, 139.26, 136.36, 131.76, 127.63, 126.84, 119.87, 117.88, 106.06, 83.47, 24.84.

$^{11}B$  NMR (128 MHz,  $CDCl_3$ )  $\delta$  29.6.

HRMS (ESI)  $m/z$  calcd for  $C_{24}H_{27}B_2N_2O_2$  ( $M^+$ ): 397.2259, found: 397.2249.

IR ( $cm^{-1}$ ): 3413, 2976, 1597, 1406, 1347, 1318, 1139.

**(3b)8-(3-(1H-naphtho[1,8-de][1,3,2]diazaborinin-2(3H)-yl)phenyl)-4-methyldihydro-4 $\lambda^4$ ,8 $\lambda^4$ -[1,3,2]oxazaborolo[2,3-b][1,3,2]oxazaborole-2,6(3H,5H)-dione**

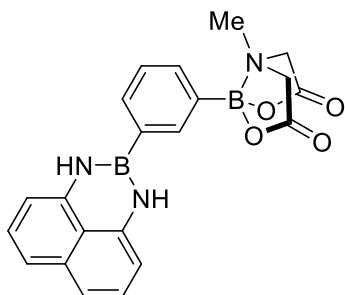

Chemical Formula:  $C_{21}H_{19}B_2N_3O_4$

Exact Mass: 399.1562

Molecular Weight: 399.0200

The general procedure A was followed using 3-chlorophenyl MIDA boronate (80.2 mg, 0.3 mmol, 1.2 eq.) as starting material. **3b** was obtained as white solid (78.8 mg, 79%) after purification by silica gel flash chromatography (PE:Acetone = 3:2).

Melting point ( $^{\circ}C$ ): > 250

$^1H$  NMR (400 MHz, Acetone- $d_6$ )  $\delta$  8.04 (s, 1H), 7.88 (d,  $J$  = 7.2 Hz, 1H), 7.73 (s, 2H), 7.61 (d,  $J$  = 7.6 Hz, 1H), 7.41 (t,  $J$  = 7.6 Hz, 1H), 7.08 (t,  $J$  = 8.0 Hz, 2H), 6.97 (d,  $J$  = 8.0 Hz, 2H), 6.56 (d,  $J$  = 7.2 Hz, 2H), 4.35 (d,  $J$  = 16.8 Hz, 2H), 4.16 (d,  $J$  = 16.8 Hz, 2H), 2.73 (s, 3H).

$^{13}C$  NMR (100 MHz, Acetone- $d_6$ )  $\delta$  169.40, 143.21, 137.45, 137.25, 135.06, 133.87, 128.45, 128.12, 121.02, 117.71, 106.65, 62.76, 48.34.

$^{11}B$  NMR (128 MHz,  $CDCl_3$ )  $\delta$  12.0, 31.3.

HRMS (APCI)  $m/z$  calcd for  $C_{21}H_{18}B_2N_3O_4$  ( $M^-$ ): 398.1489, found: 398.1498.

IR ( $cm^{-1}$ ): 3392, 3373, 1749, 1600, 1282, 1203, 1042, 990.

**(3c)8-(4-(1*H*-naphtho[1,8-*de*][1,3,2]diazaborinin-2(3*H*)-yl)phenyl)-4-methyldihydro-4λ<sup>4</sup>,8λ<sup>4</sup>-[1,3,2]oxazaborolo[2,3-*b*][1,3,2]oxazaborole-2,6(3*H*,5*H*)-dione**

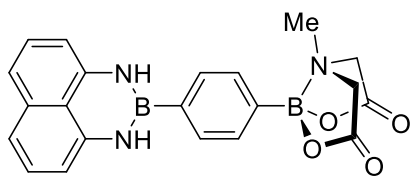

Chemical Formula: C<sub>21</sub>H<sub>19</sub>B<sub>2</sub>N<sub>3</sub>O<sub>4</sub>

Exact Mass: 399.1562

Molecular Weight: 399.0200

The general procedure A was followed using 4-bromophenyl MIDA boronate (93.6 mg, 0.3 mmol, 1.2 eq.) as starting material. **3c** was obtained as white solid (66.8 mg, 67%) after purification by silica gel flash chromatography (PE:Acetone = 3:2).

Melting point (°C): > 250

<sup>1</sup>H NMR (400 MHz, Acetone-*d*<sub>6</sub>) δ 7.88 (d, *J* = 7.9 Hz, 2H), 7.68 (s, 2H), 7.59 (d, *J* = 8.0 Hz, 2H), 7.16 (t, *J* = 8.0 Hz, 2H), 6.98 (d, *J* = 8.0 Hz, 2H), 6.61 (d, *J* = 7.2 Hz, 2H), 4.37 (d, *J* = 17.2 Hz, 2H), 4.15 (d, *J*

= 17.2 Hz, 2H), 2.74 (s, 3H).

<sup>13</sup>C NMR (100 MHz, Acetone-*d*<sub>6</sub>) δ 169.35, 143.14, 137.43, 132.84, 132.45, 128.45, 121.06, 117.77, 106.76, 62.78, 48.30.

<sup>11</sup>B NMR (128 MHz, CDCl<sub>3</sub>) δ 11.9, 31.0.

HRMS (ESI) *m/z* calcd for C<sub>21</sub>H<sub>20</sub>B<sub>2</sub>N<sub>3</sub>O<sub>4</sub> (M<sup>+</sup>): 400.1640, found: 400.1630.

IR (cm<sup>-1</sup>): 3373, 1746, 1598, 1282, 1204, 1040, 990.

**(3d)2-(4-(5,5-dimethyl-1,3,2-dioxaborinan-2-yl)phenyl)-2,3-dihydro-1*H*-naphtho[1,8-*de*][1,3,2]diazaborinine**

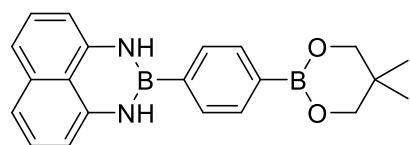

Chemical Formula: C<sub>21</sub>H<sub>22</sub>B<sub>2</sub>N<sub>2</sub>O<sub>2</sub>

Exact Mass: 356.1867

Molecular Weight: 356.0390

The product **3d** was synthesized according to the method of a published literature.<sup>5</sup>

In a dried Schlenk flask (10 mL in volume) equipped with a stirring bar were placed with *p*-B(dan) benzonitrile (53.8 mg, 0.20 mmol, 1.0 eq.), bis(neopentylglycolato)diboron (90.4 mg, 0.40 mmol, 2.0 eq.), [RhCl(cod)]<sub>2</sub> (4.9 mg, 0.01 mmol, 5 mol %), XantPhos (23.1 mg, 0.04 mmol, 20 mol %), DABCO (22.5 mg, 0.20 mmol, 1.0 eq.). After

evacuation and refill with dry nitrogen for three times, toluene (0.2 mL) were added with syringes under a stream of nitrogen. The resulting mixture was allowed to stir at 100 °C for 15 h. After cooling to room temperature, the reaction mixture was concentrated and then purified by column chromatography on silica gel to give the target product as white solid (32.0 mg, 45%) after purification by silica gel flash chromatography (PE:EA = 10:1).

Melting point (°C): 173.5-176.8

<sup>1</sup>H NMR (400 MHz, CDCl<sub>3</sub>) δ 7.87 (d, *J* = 8.0 Hz, 2H), 7.65 (d, *J* = 7.6 Hz, 2H), 7.14 (t, *J* = 8.0 Hz, 2H), 7.05 (d, *J* = 8.0 Hz, 2H), 6.42 (d, *J* = 7.6 Hz, 2H), 6.07 (br, 2H), 3.80 (s, 4H), 1.05 (s, 6H).

<sup>13</sup>C NMR (100 MHz, CDCl<sub>3</sub>) δ 141.23, 136.48, 133.70, 130.72, 127.76, 120.03, 117.91, 106.15, 72.49, 32.05, 22.05.

<sup>11</sup>B NMR (128 MHz, CDCl<sub>3</sub>) δ 32.3.

HRMS (APCI) *m/z* calcd for C<sub>21</sub>H<sub>21</sub>B<sub>2</sub>N<sub>2</sub>O<sub>2</sub> (M<sup>-</sup>): 355.1795, found: 355.1790.

IR (cm<sup>-1</sup>): 3413, 2925, 1596, 1409, 1305, 1129.

**(3e) 2-(3-(2-(4,4,5,5-tetramethyl-1,3,2-dioxaborolan-2-yl)ethyl)phenyl)-2,3-dihydro-1H-naphtho[1,8-de][1,3,2]diazaborinine**

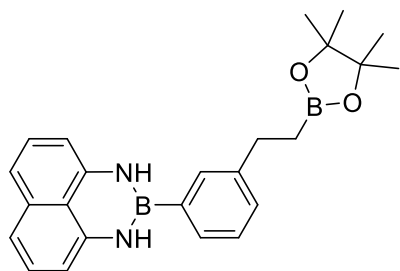

Chemical Formula:  $C_{24}H_{28}B_2N_2O_2$

Exact Mass: 398.2337

Molecular Weight: 398.1200

The product **3e** was synthesized according to the method of a published literature.<sup>6</sup>

CuCl (1.0 mg, 0.01 mmol, 5 mol %), NaOt-Bu (2.9 mg, 0.03 mmol, 15 mol %) and DPEphos (5.4 mg, 0.01 mmol, 5 mol %) were placed in an oven-dried Schlenk tube and THF (0.20 ml) were added under nitrogen. The reaction mixture was stirred for 30 min at room temperature and then, bis(pinacolato)diboron and THF (0.20 ml) were added. The reaction mixture was stirred for 10 min and **21** compound (54.0 mg, 0.20 mmol) was added, followed by MeOH (12.8 mg, 0.40 mmol). The reaction tube was washed with THF (0.40 mL), sealed, and stirred for 20 hours at 30°C. Then reaction mixture was concentrated and purified by

column chromatography on silica gel to give the target product as white solid (78.0 mg, 98%) after purification by silica gel flash chromatography (PE:EA = 15:1).

Melting point (°C): 158.7-162.6

$^1\text{H}$  NMR (400 MHz,  $\text{CDCl}_3$ )  $\delta$  7.52 (s, 1H), 7.45 (d,  $J$  = 5.2 Hz, 1H), 7.37-7.34 (m, 2H), 7.15 (t,  $J$  = 8.0 Hz, 2H), 7.06 (d,  $J$  = 8.4 Hz, 2H), 6.42 (d,  $J$  = 7.2 Hz, 2H), 6.05 (br, 2H), 2.82 (t,  $J$  = 8.4 Hz, 2H), 1.27-1.19 (m, 14H).

$^{13}\text{C}$  NMR (100 MHz,  $\text{CDCl}_3$ )  $\delta$  144.20, 141.20, 136.36, 131.20, 130.15, 128.68, 128.20, 127.65, 119.86, 117.72, 105.97, 83.20, 30.05, 24.85.

$^{11}\text{B}$  NMR (128 MHz,  $\text{CDCl}_3$ )  $\delta$  34.6, 30.7.

HRMS (APCI)  $m/z$  calcd for  $C_{24}H_{28}B_2N_2O_2$  (M<sup>-</sup>): 397.2264, found: 397.2269.

IR ( $\text{cm}^{-1}$ ): 3429, 3382, 1596, 1407, 1371, 1321, 1237, 1139.

**(4) 4-(1H-naphtho[1,8-de][1,3,2]diazaborinin-2(3H)-yl)-N-phenylaniline**

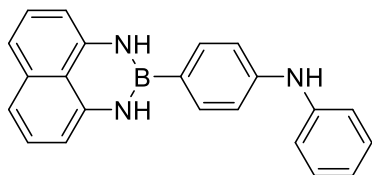

Chemical Formula:  $C_{22}H_{18}BN_3$

Exact Mass: 335.1594

Molecular Weight: 335.2170

The product **4** was synthesized according to the method of a published literature.<sup>7</sup>

In a dried Schlenk flask (25 mL in volume) equipped with a stirring bar were placed with p-B(dan)aniline (64.8 mg, 0.25 mmol, 1.0 eq.),  $\text{Pd}_2(\text{dba})_3$  (2.3 mg, 0.0025 mmol, 1 mol %), XPhos (4.8 mg, 0.01 mmol, 4 mol %),  $\text{K}_2\text{CO}_3$  (103.7 mg, 0.75 mmol, 3.0 eq.). After evacuation and refill with dry nitrogen for three times, phenylbromide (0.3 mmol, 1.2 eq.) and *t*-BuOH (0.5 mL) were added with syringes under a stream of

nitrogen. The resulting mixture was allowed to stir at 110 °C for 20 h. After cooling to room temperature, the reaction mixture was filtered, concentrated and then purified by column chromatography on silica gel to give the target product as yellow solid (62.8 mg, 75 %) after purification by silica gel flash chromatography (PE:EA = 15:1).

Melting point (°C): 164.8-169.2

$^1\text{H}$  NMR (400 MHz,  $\text{CDCl}_3$ )  $\delta$  7.54 (d,  $J$  = 8.4 Hz, 2H), 7.32 (t,  $J$  = 8.0 Hz, 2H), 7.20 – 7.02 (m, 9H), 6.41 (d,  $J$  = 7.2 Hz, 2H), 5.99 (br, 2H).

$^{13}\text{C}$  NMR (100 MHz,  $\text{CDCl}_3$ )  $\delta$  145.46, 142.06, 141.40, 136.50, 132.97, 129.59, 127.75, 122.22, 119.80, 119.23, 117.74, 116.46, 106.02.

$^{11}\text{B}$  NMR (128 MHz,  $\text{CDCl}_3$ )  $\delta$  30.9.

HRMS (APCI)  $m/z$  calcd for  $C_{22}H_{16}B_2N_2$  (M<sup>-</sup>): 334.1521, found: 334.1526.

IR ( $\text{cm}^{-1}$ ): 3433, 3416, 3367, 1595, 1495, 1405, 1326, 1084.

**(5) 2-([1,1'-biphenyl]-4-yl)-2,3-dihydro-1H-naphtho[1,8-de][1,3,2]diazaborinine (CAS: 950511-20-3)<sup>8</sup>**

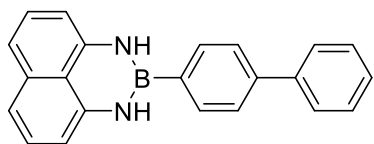

Chemical Formula: C<sub>22</sub>H<sub>17</sub>BN<sub>2</sub>

Exact Mass: 320.1485

Molecular Weight: 320.2020

The product **5** was synthesized according to the method of a published literature.<sup>9</sup>

Melting point (°C): 185.3-188.5

<sup>1</sup>H NMR (400 MHz, CDCl<sub>3</sub>) δ 7.74 – 7.63 (m, 6H), 7.47 (t, *J* = 8.0 Hz, 2H), 7.38 (t, *J* = 7.2 Hz, 1H), 7.15 (t, *J* = 8.0 Hz, 2H), 7.07 (d, *J* = 8.0 Hz, 2H), 6.44 (d, *J* = 7.2 Hz, 2H), 6.08 (br, 2H).

<sup>13</sup>C NMR (100 MHz, CDCl<sub>3</sub>) δ 143.17, 141.20, 140.88, 136.50, 132.10, 129.01, 127.78, 127.31, 127.11, 120.00, 118.00, 106.19.

HRMS (APCI) *m/z* calcd for C<sub>22</sub>H<sub>16</sub>B<sub>2</sub>N<sub>2</sub> (M<sup>-</sup>): 319.1412, found: 319.1416.

IR (cm<sup>-1</sup>): 3426, 3410, 1597, 1396, 1331, 1165, 1083.

**(6) 8-(3-(1H-naphtho[1,8-de][1,3,2]diazaborinin-2(3H)-yl)-5-(4,4,5,5-tetramethyl-1,3,2-dioxaborolan-2-yl)phenyl)-4-methyldihydro-4λ<sup>4</sup>,8λ<sup>4</sup>-[1,3,2]oxazaborolo[2,3-*b*][1,3,2]oxazaborole-2,6(3H,5H)-dione**

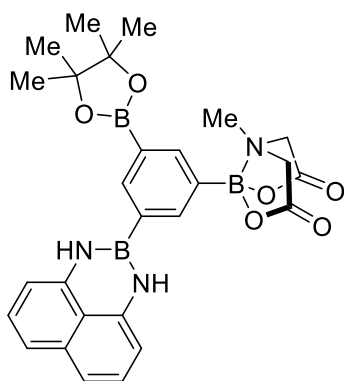

Chemical Formula: C<sub>27</sub>H<sub>30</sub>B<sub>3</sub>N<sub>3</sub>O<sub>6</sub>

Exact Mass: 525.2414

Molecular Weight: 524.9820

The general procedure A was followed at 0.10 mmol scale using 1-B(pin)-3-B(MIDA)phenyl chloride (47.2 mg, 0.12 mmol, 1.2 eq.) as starting material. **6** was obtained as white solid (22.0 mg, 42%) after purification by silica gel flash chromatography (PE:Acetone = 1:1).

Melting point (°C): >250

<sup>1</sup>H NMR (400 MHz, Acetone-*d*<sub>6</sub>) δ 8.22 (s, 1H), 8.13 (s, 1H), 8.08 (s, 1H), 7.86 (s, 2H), 7.06 (t, *J* = 7.6 Hz, 2H), 6.97 (d, *J* = 8.0 Hz, 2H), 6.58 (d, *J* = 7.2 Hz, 2H), 4.38 (d, *J* = 16.8 Hz, 2H), 4.19 (d, *J* = 17.2 Hz, 2H), 2.77 (s, 3H), 1.36 (s, 12H).

<sup>13</sup>C NMR (100 MHz, Acetone-*d*<sub>6</sub>) δ 168.51, 142.40, 140.69, 139.49, 139.40, 136.56, 127.56, 120.19, 116.79, 105.77, 83.56, 61.99, 47.62, 24.37.

<sup>11</sup>B NMR (128 MHz, CDCl<sub>3</sub>) δ 12.2, 30.7.

HRMS (APCI) *m/z* calcd for C<sub>27</sub>H<sub>16</sub>B<sub>2</sub>N<sub>2</sub> (M<sup>-</sup>): 524.2341, found: 524.2349.

IR (cm<sup>-1</sup>): 3390, 2920, 1765, 1599, 1362, 1204, 1024.

- 1 N. Iwadate and M. Suginome, *J. Am. Chem. Soc.*, 2010, **132**, 2548.
- 2 C. A. Slabber, C. D. Grimmer and R. S. Robinson, *J. Organomet. Chem.*, 2013, **723**, 122.
- 3 C.-Y. Lee, S.-J. Ahn and C.-H. Cheon, *J. Org. Chem.*, 2013, **78**, 12154.
- 4 N. Iwadate and M. Suginome, *J. Organomet. Chem.*, 2009, **694**, 1713.
- 5 M. Tobisu, H. Kinuta, Y. Kita, E. Remond and N. Chatani, *J. Am. Chem. Soc.*, 2012, **134**, 115.
- 6 S. Mun, J.-E. Lee and J. Yun, *Org. Lett.*, 2006, **8**, 4887.
- 7 X. Huang, K. W. Anderson, D. Zim, L. Jiang, A. Klapars and S. L. Buchwald, *J. Am. Chem. Soc.*, 2003, **125**, 6653.
- 8 H. Noguchi, T. Shioda, C.-M. Chou and M. Suginome, *Org. Lett.*, 2008, **10**, 377.
- 9 H. Wang, C. Grohmann, C. Nimphius and F. Glorius, *J. Am. Chem. Soc.*, 2012, **134**, 19592.

## 4. Copies of NMR

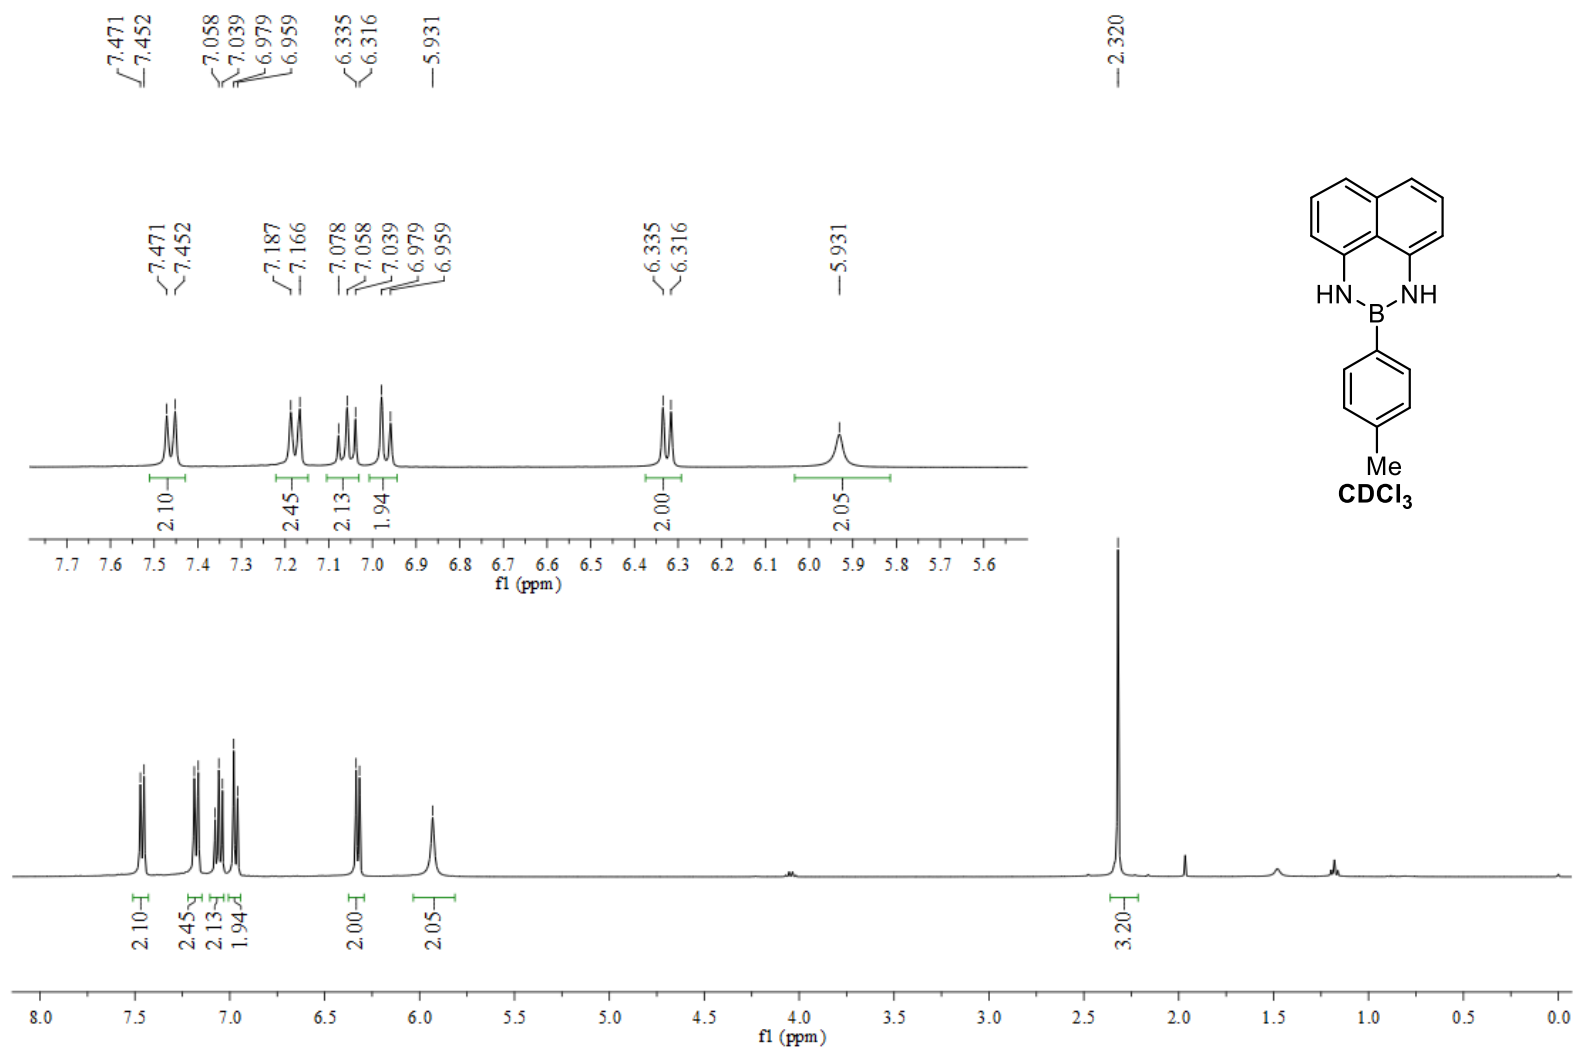



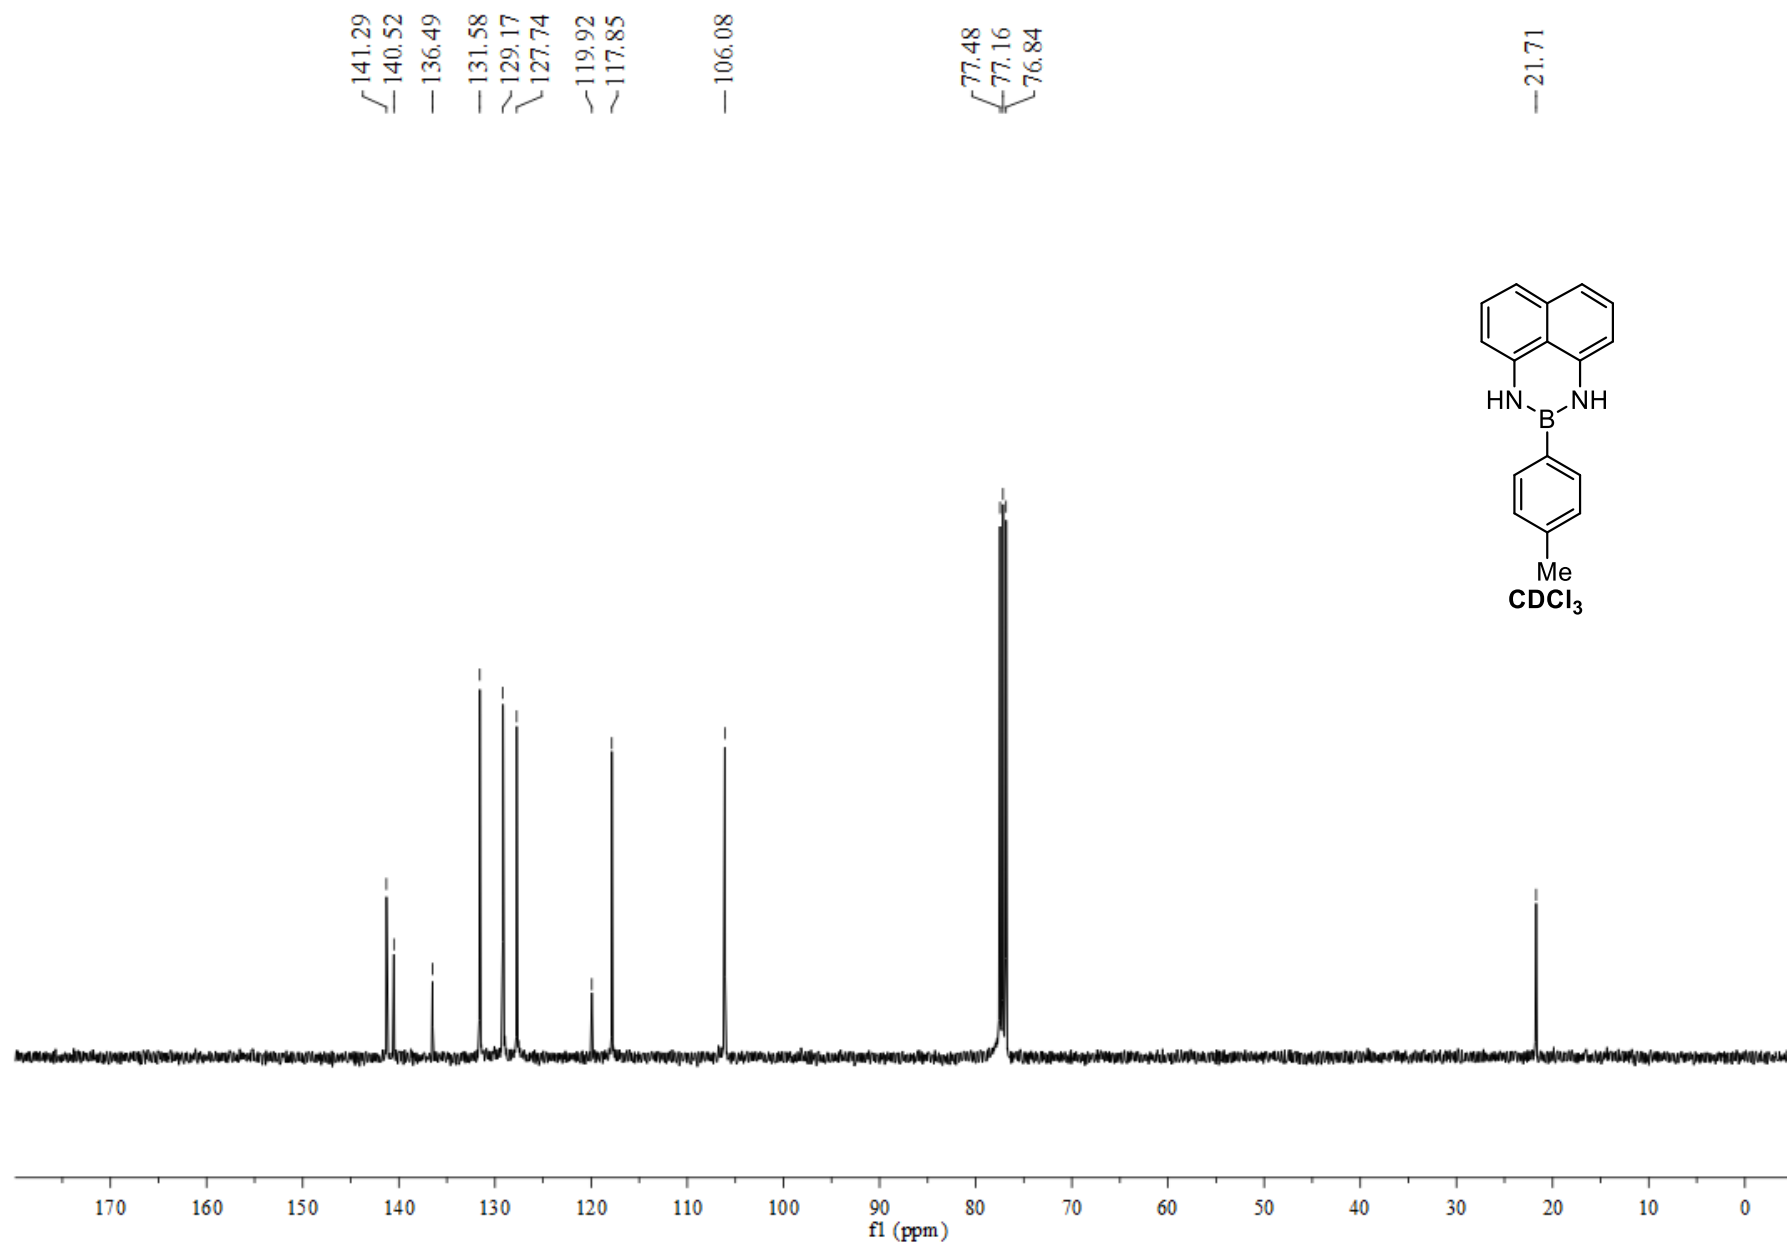

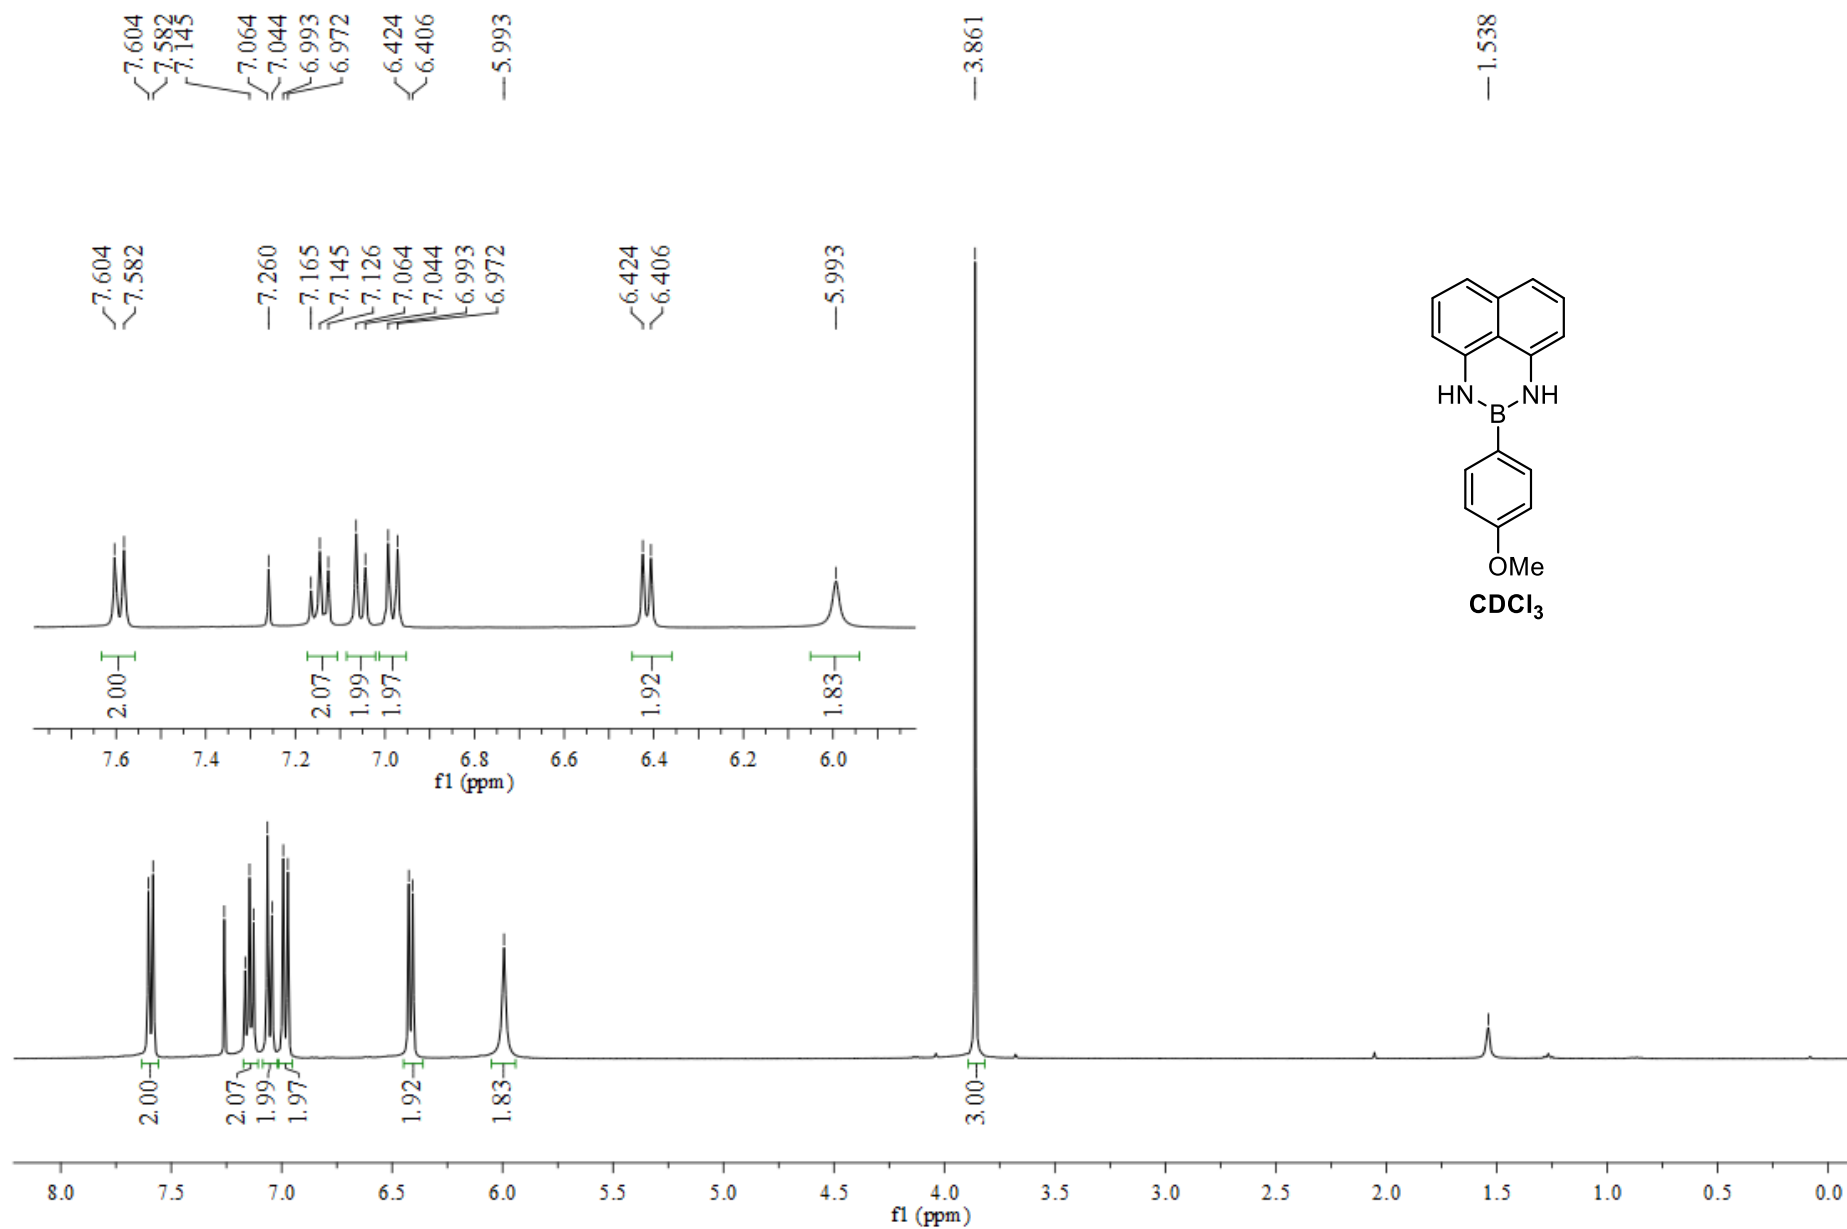

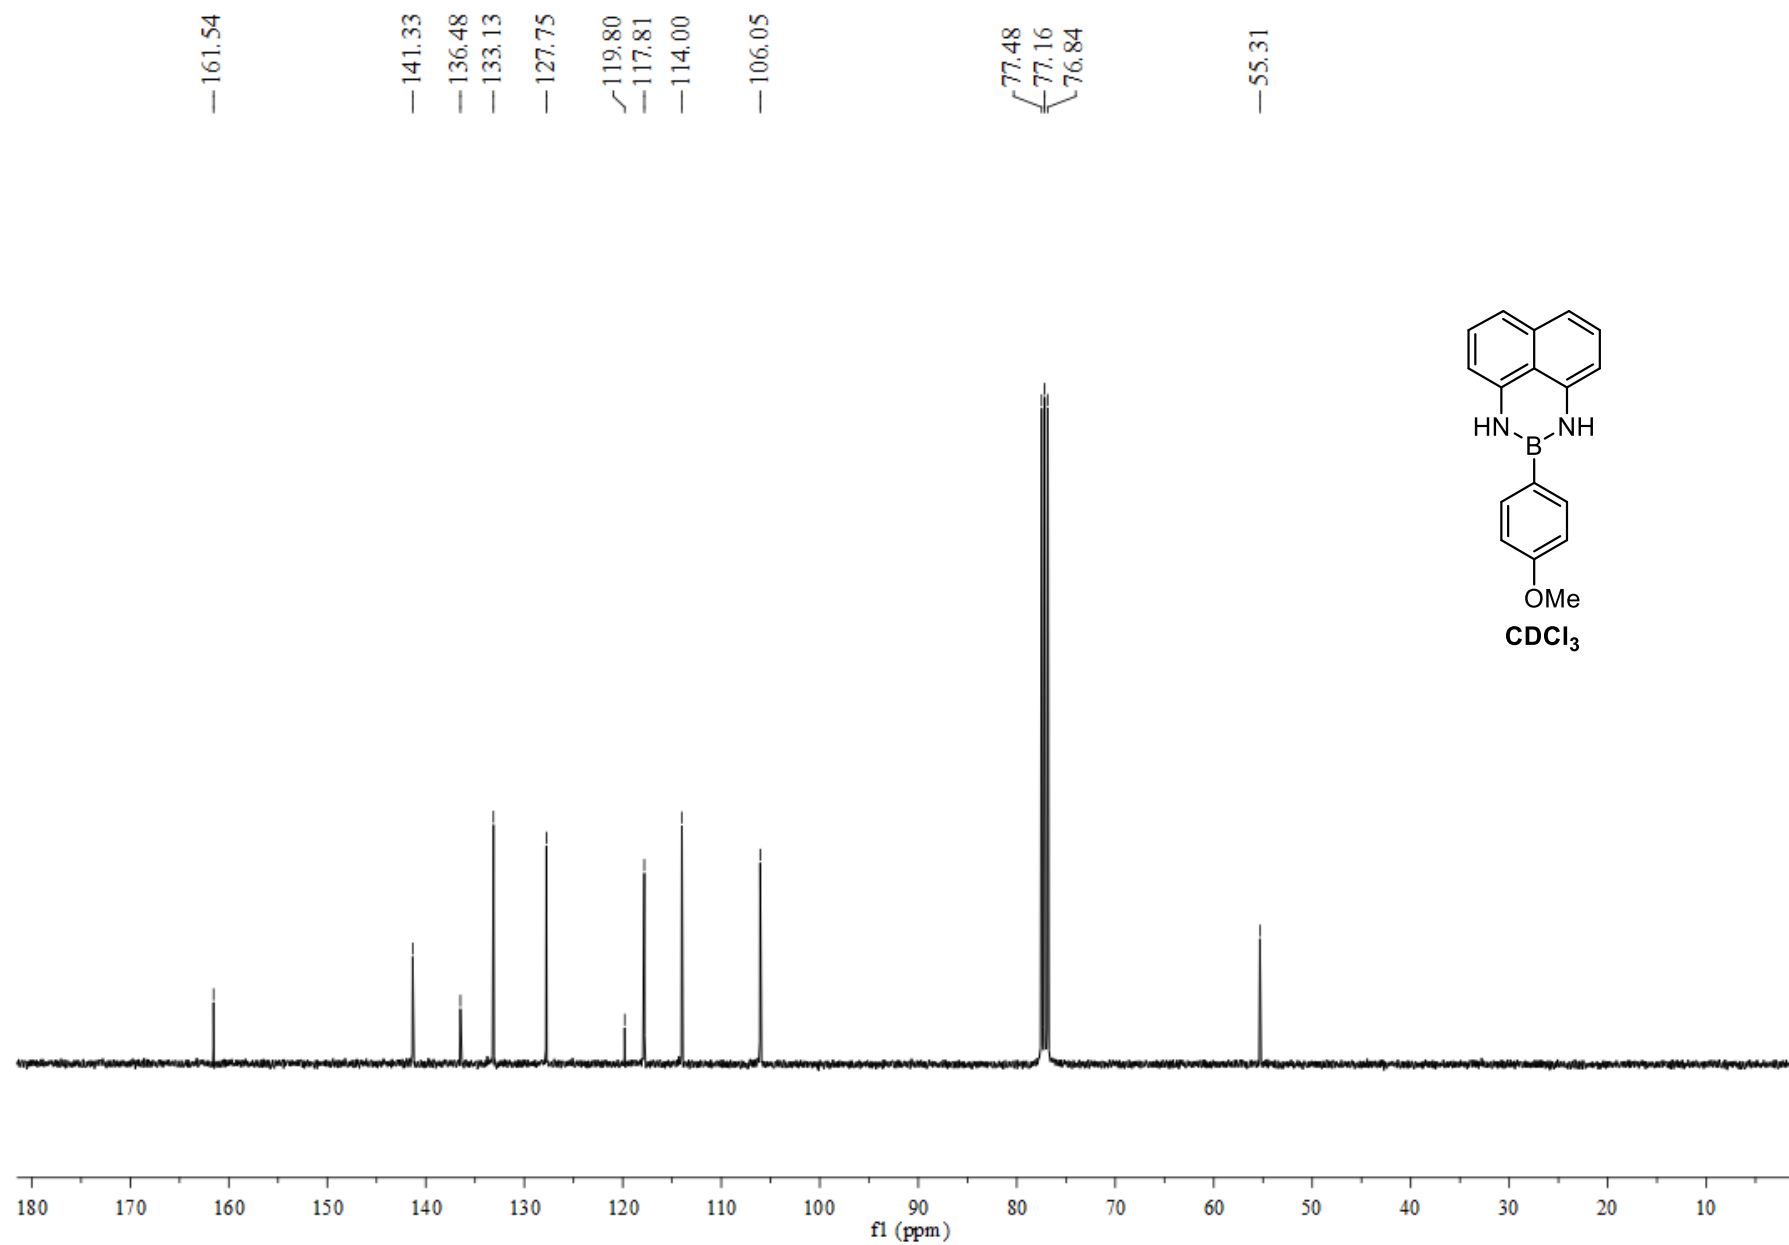

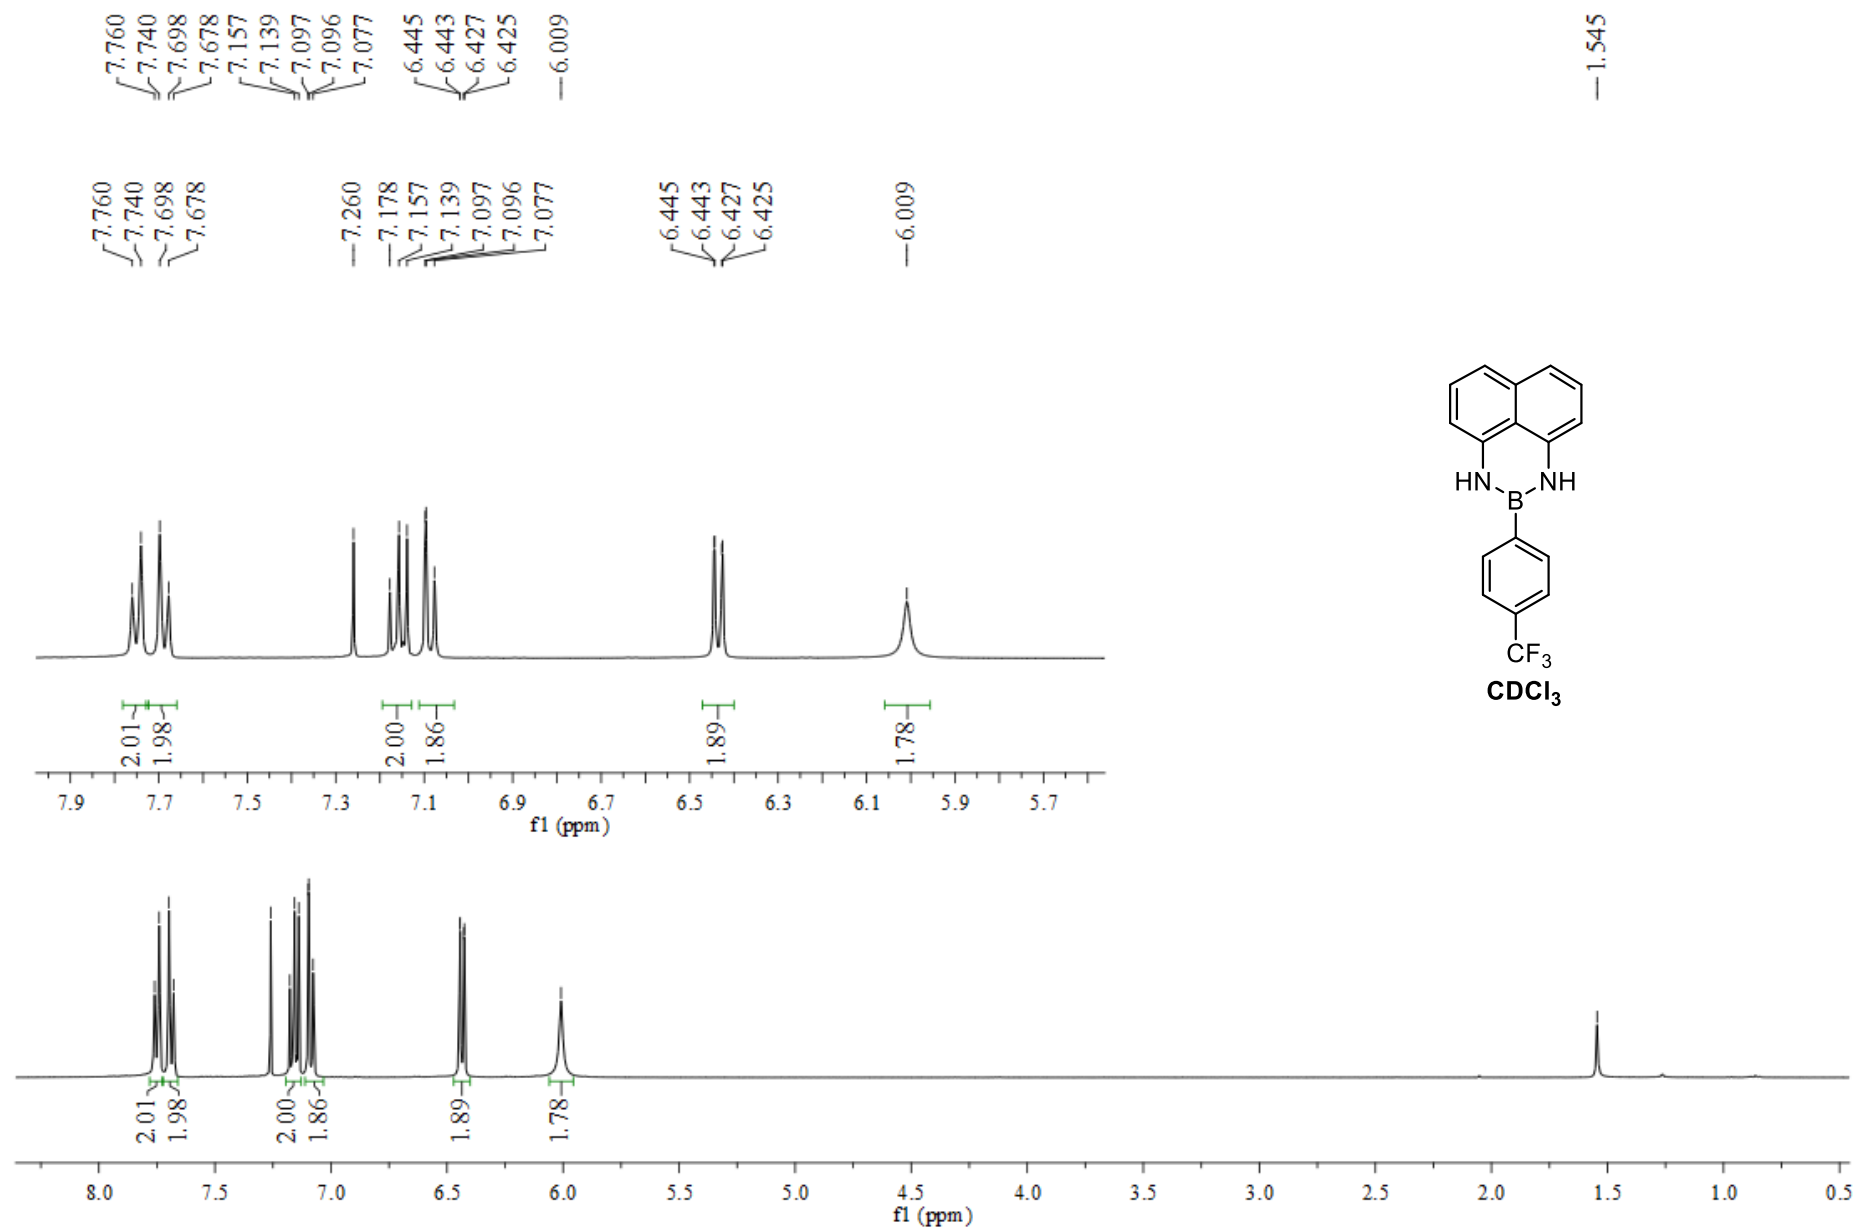

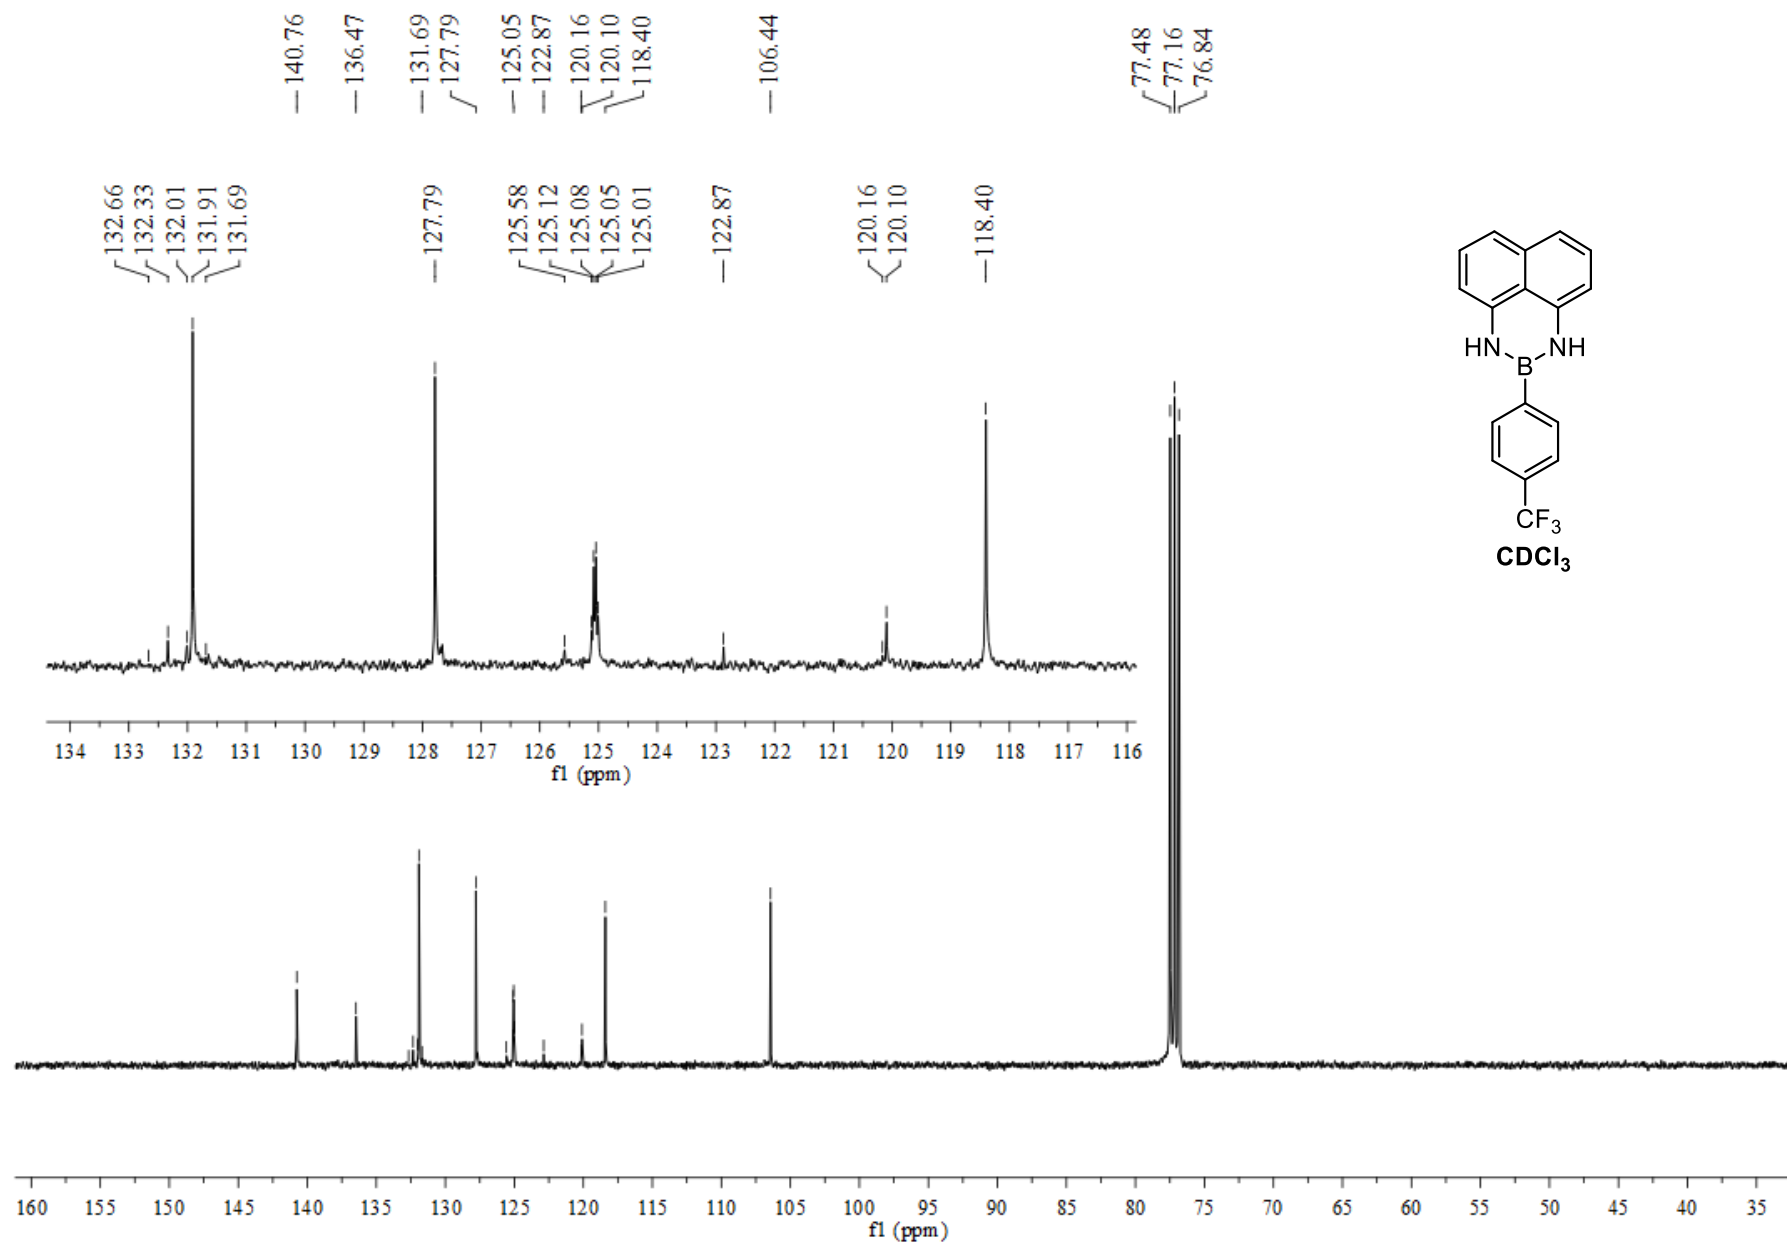

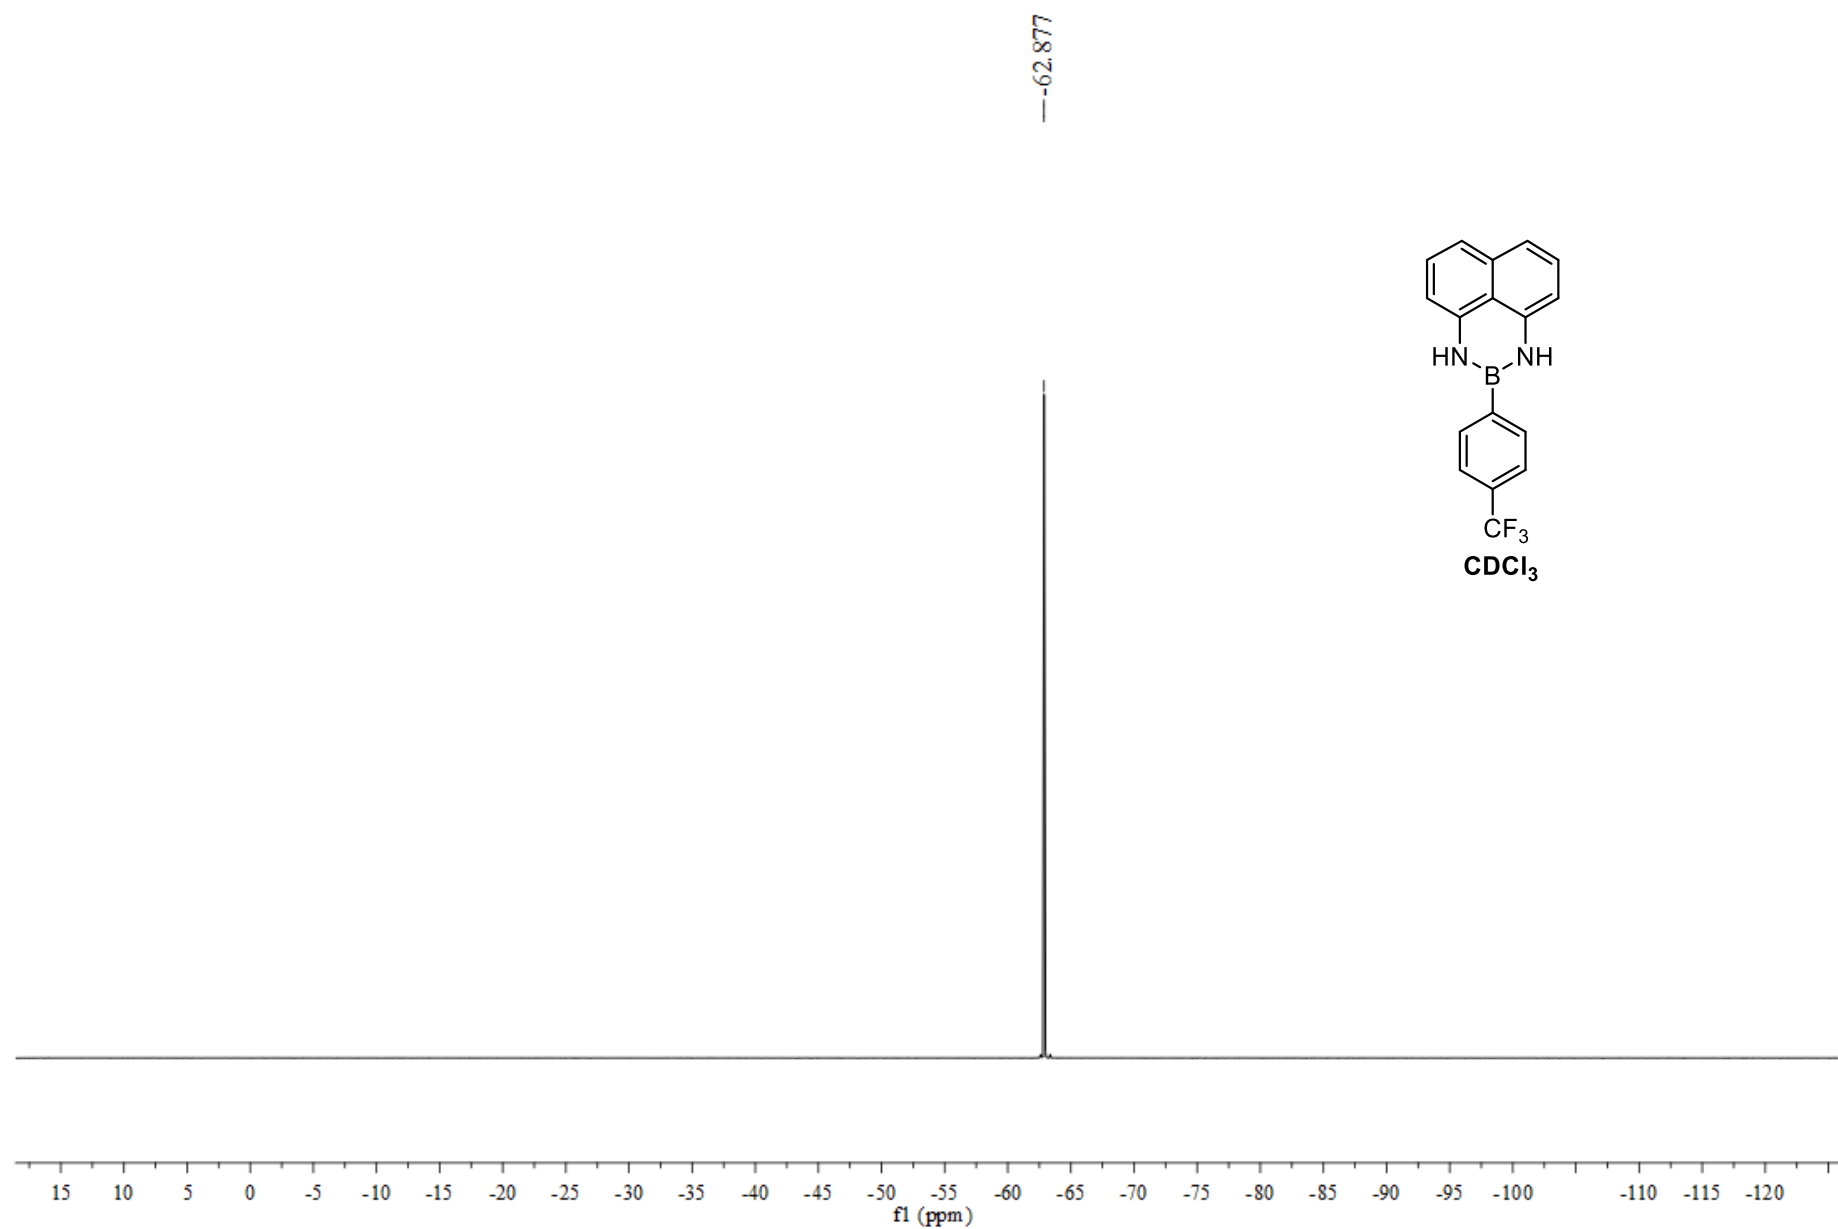

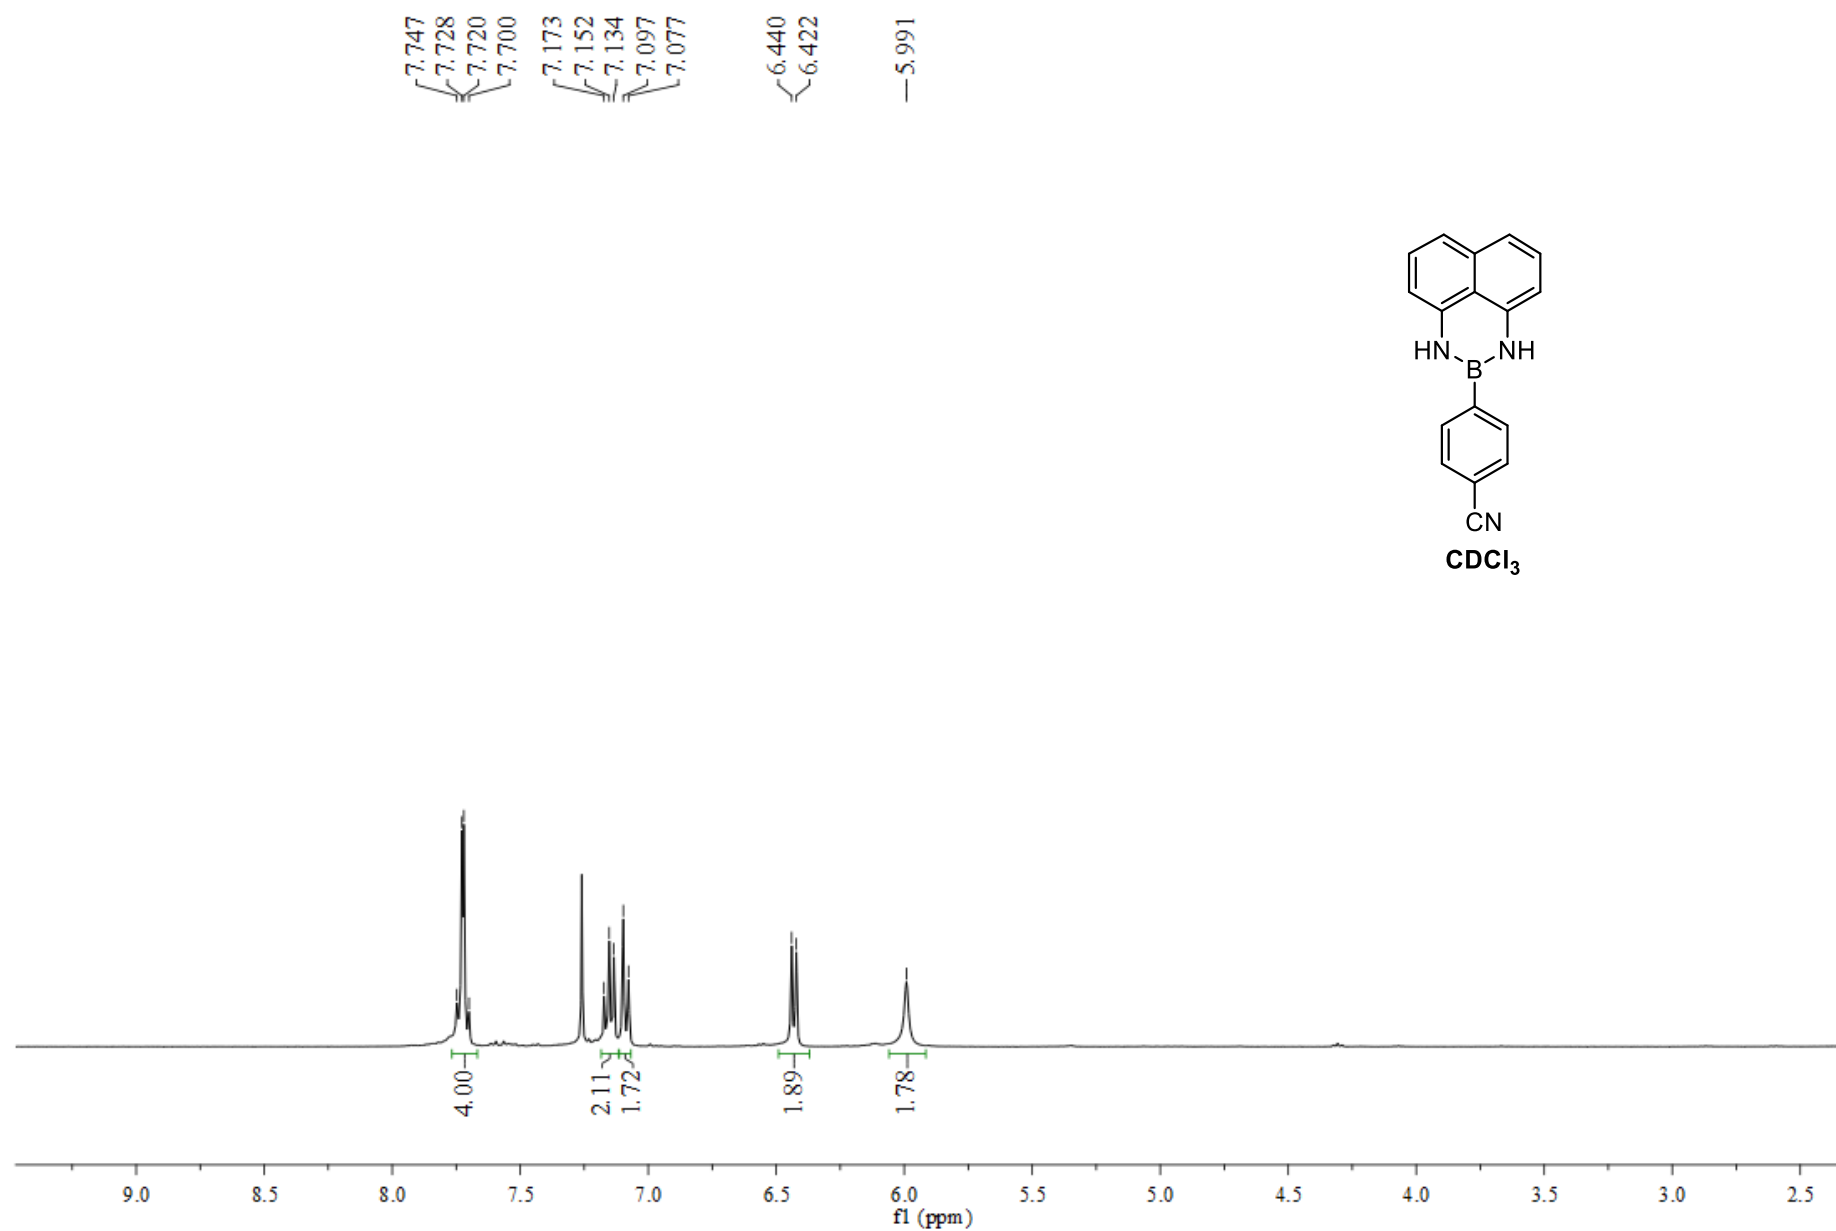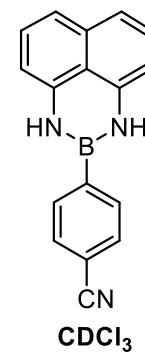

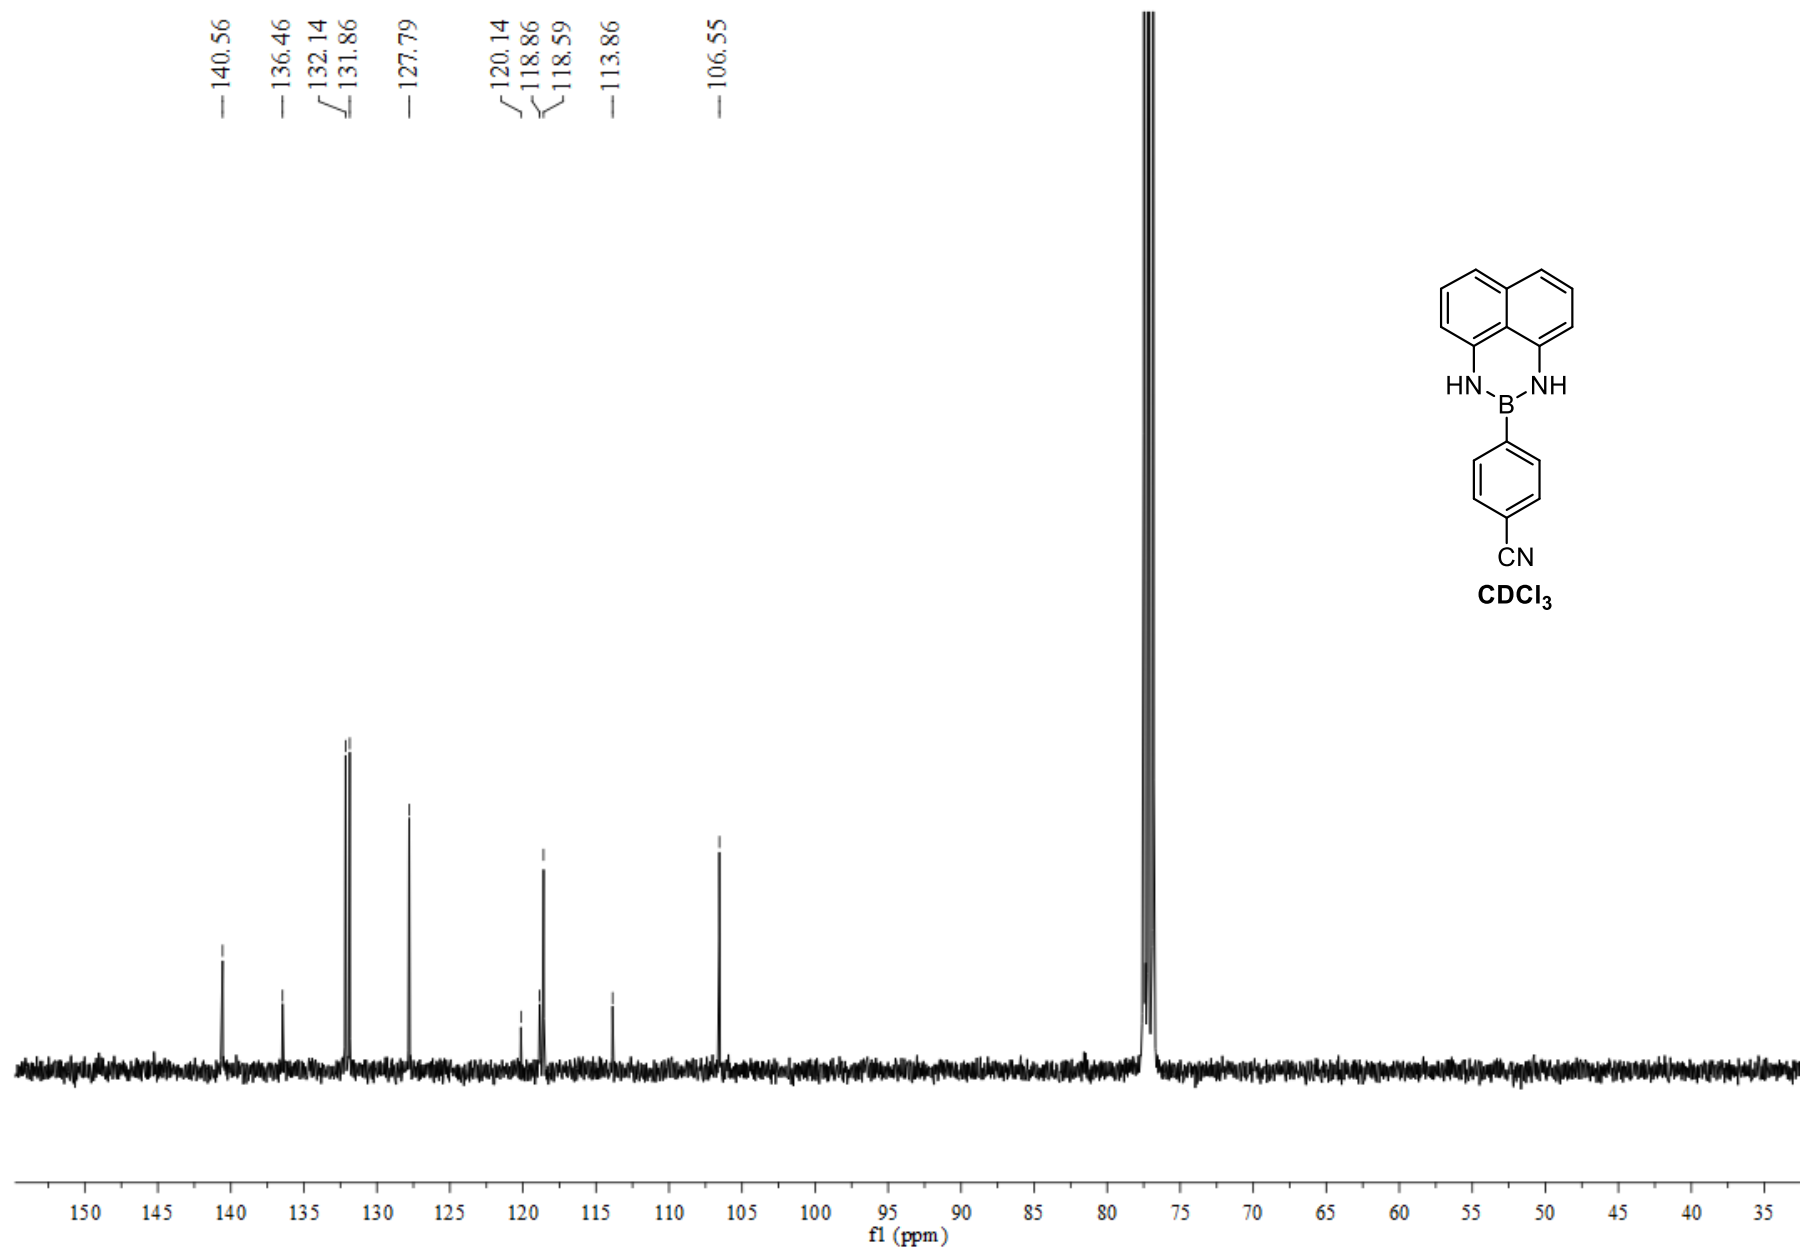



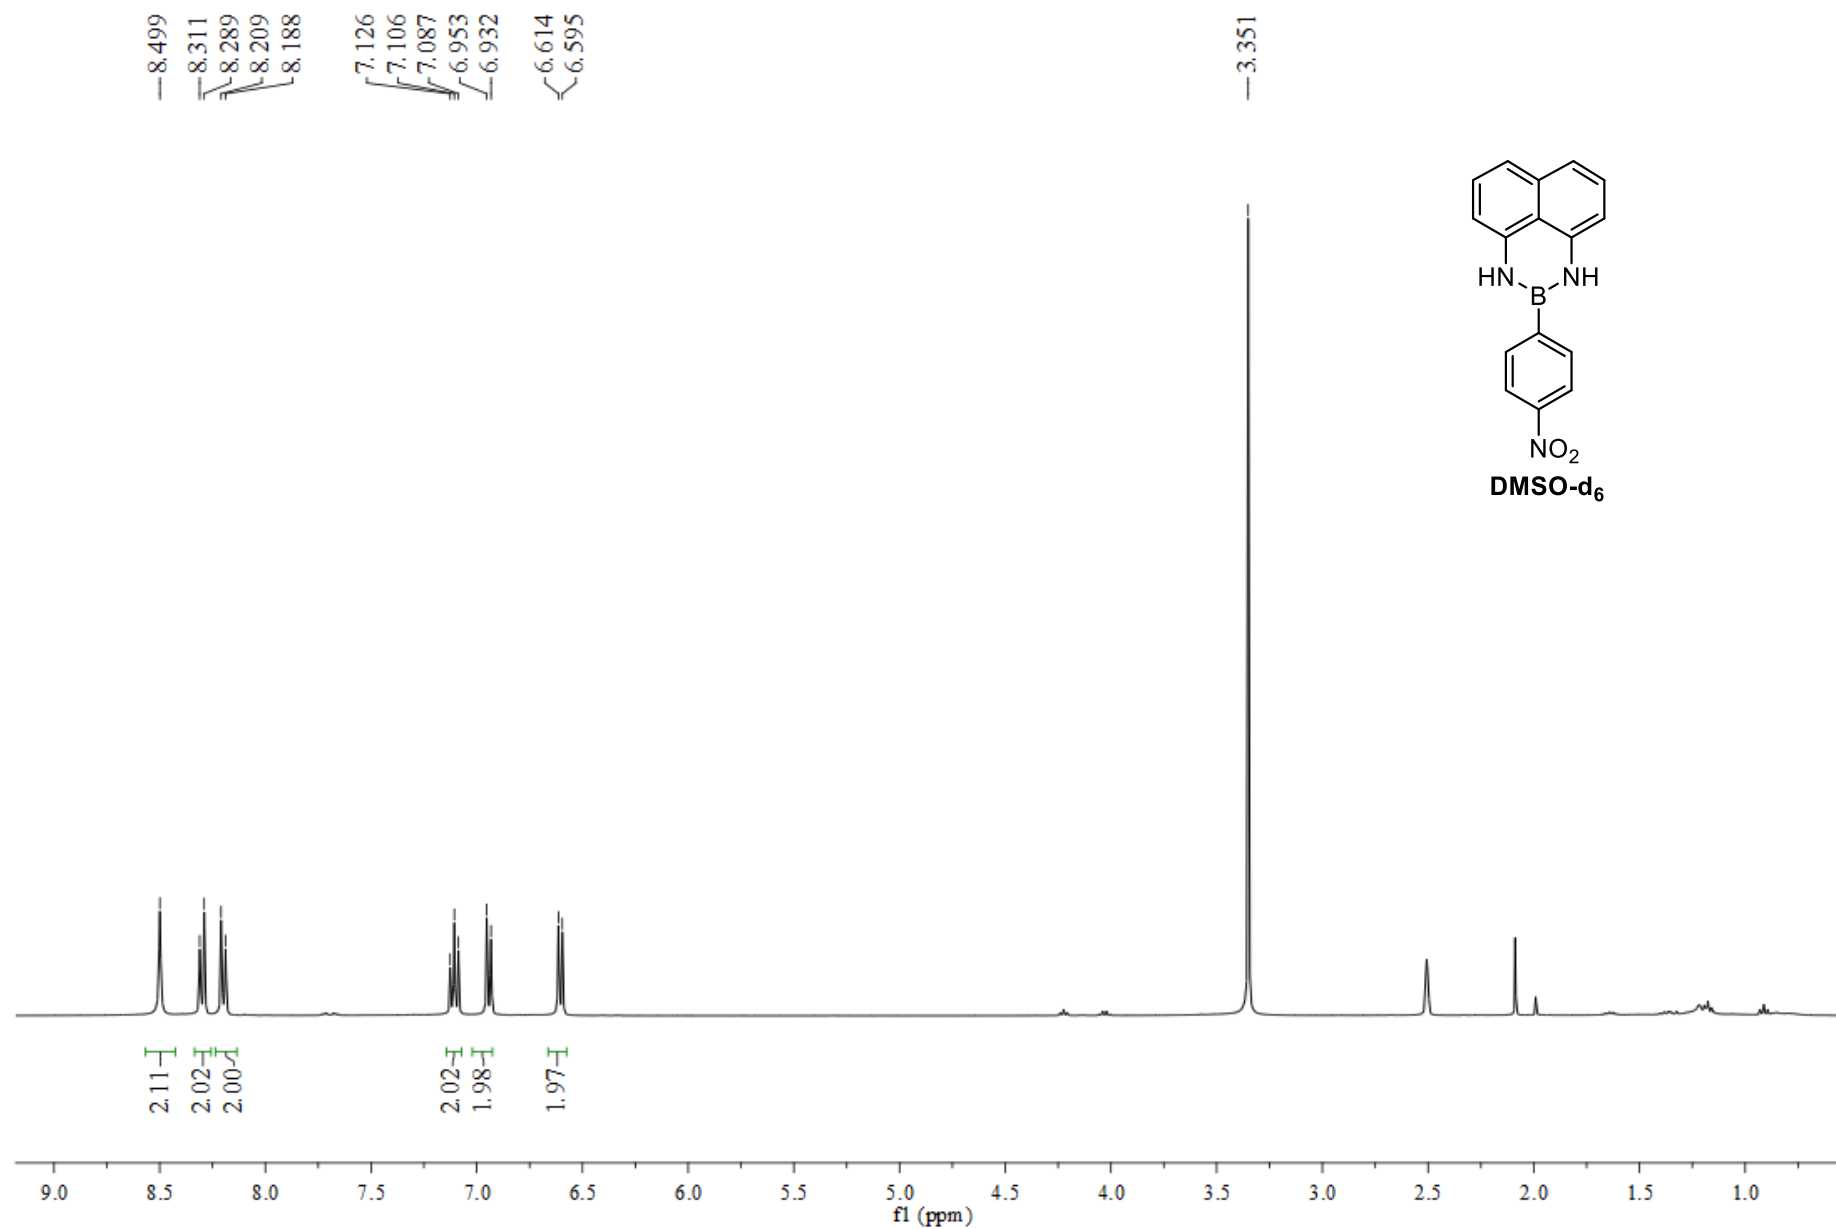

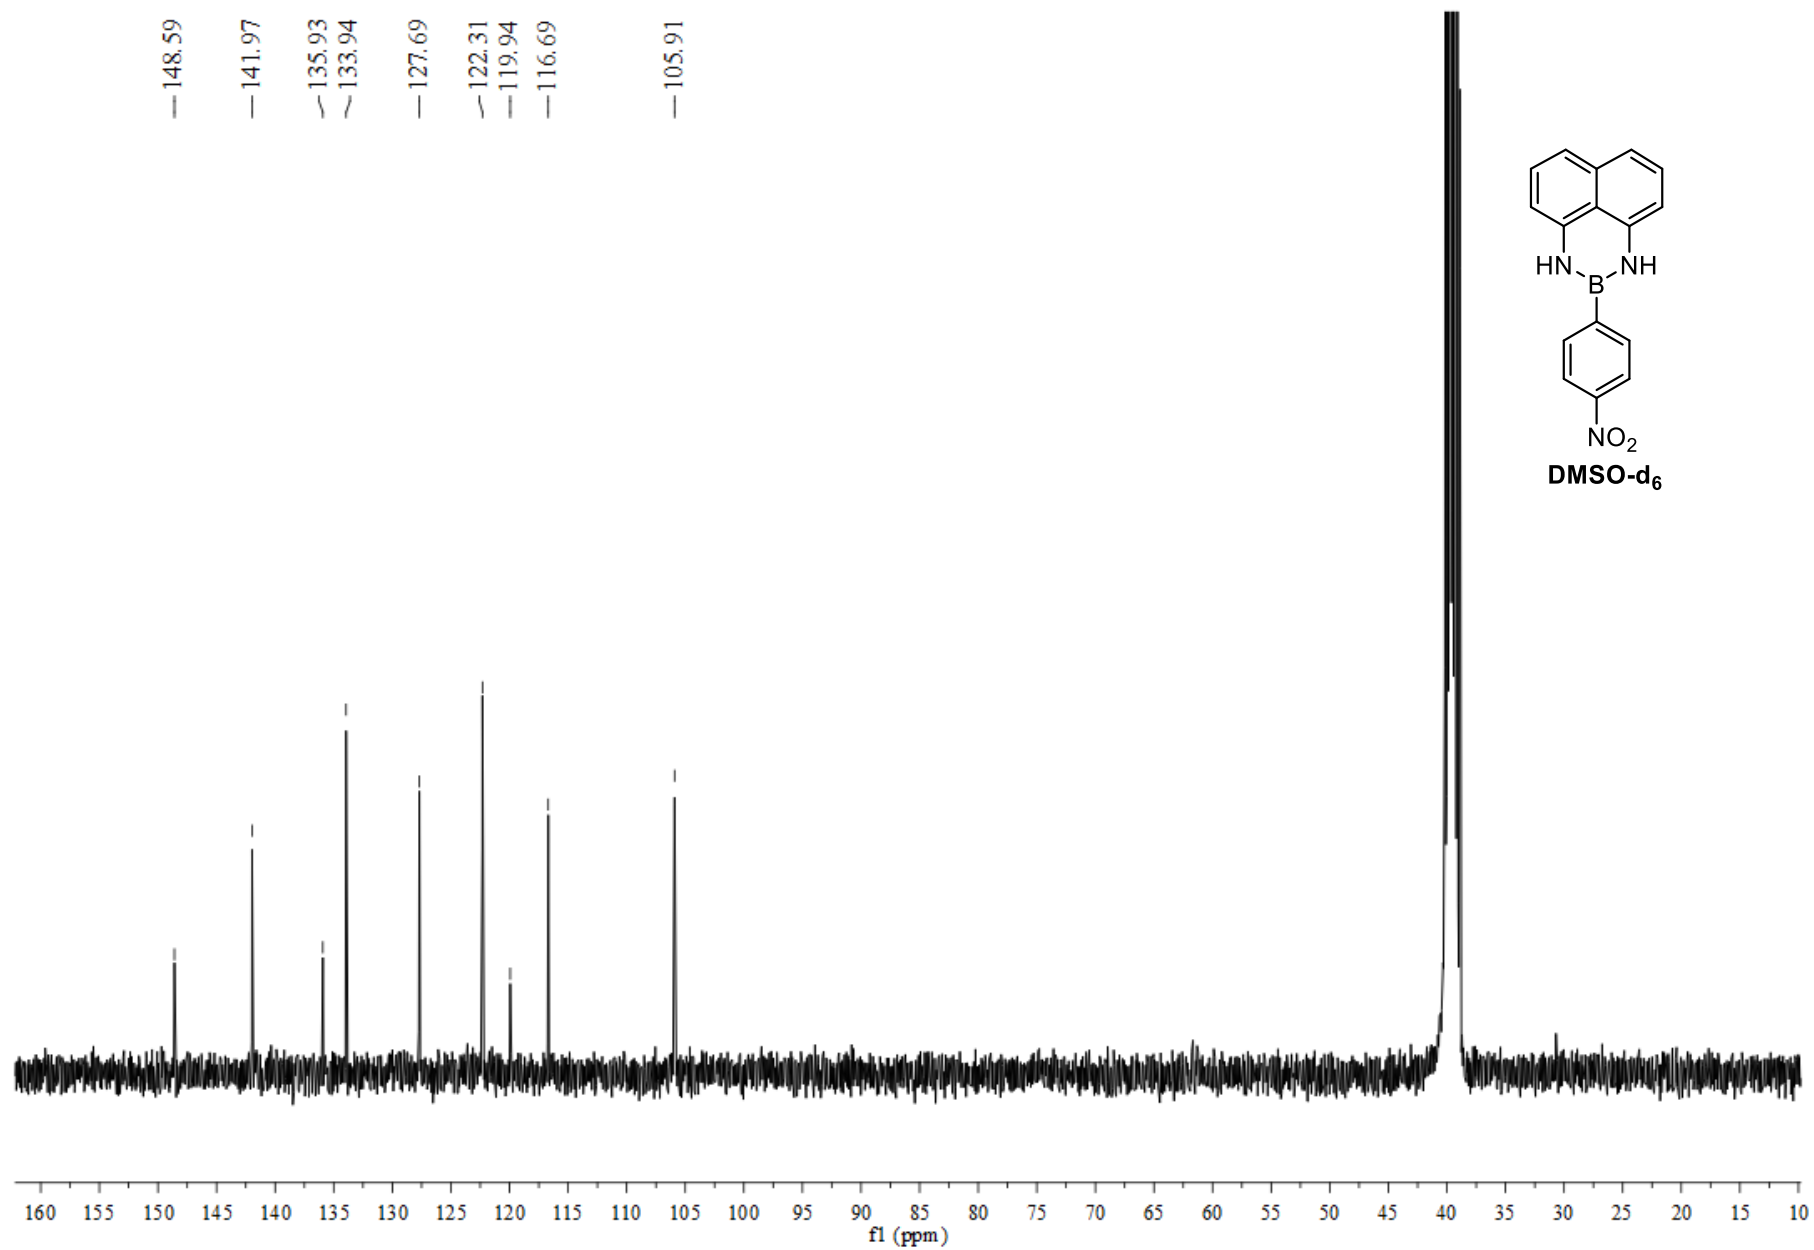

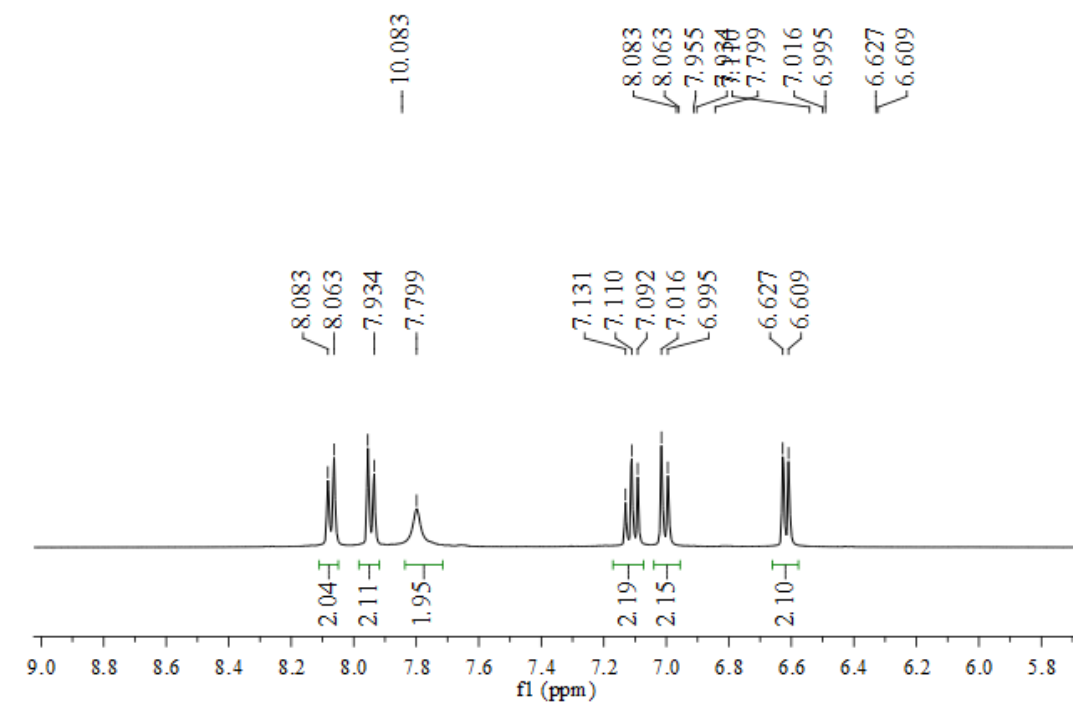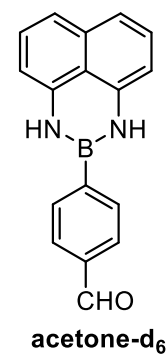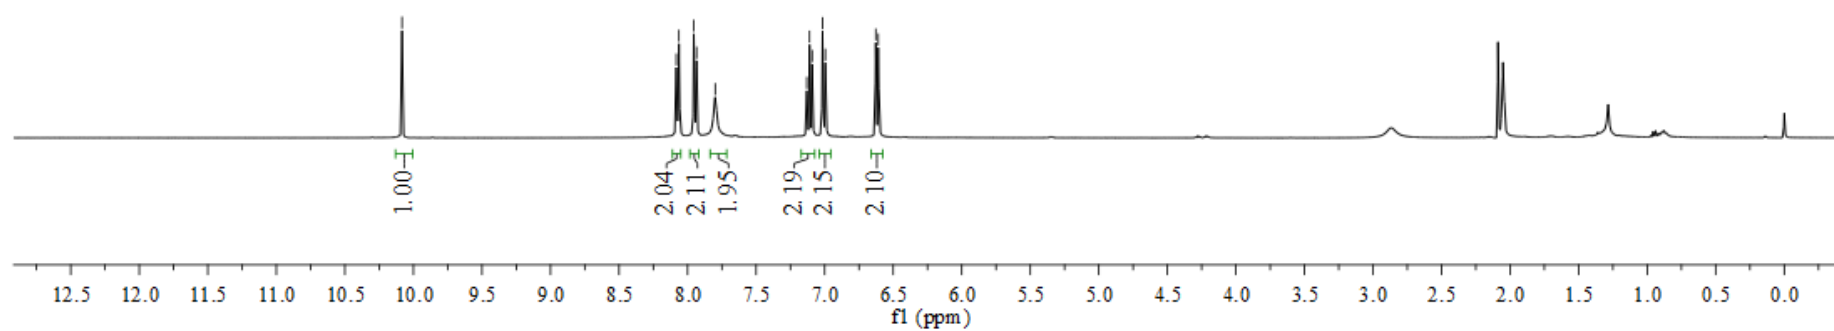

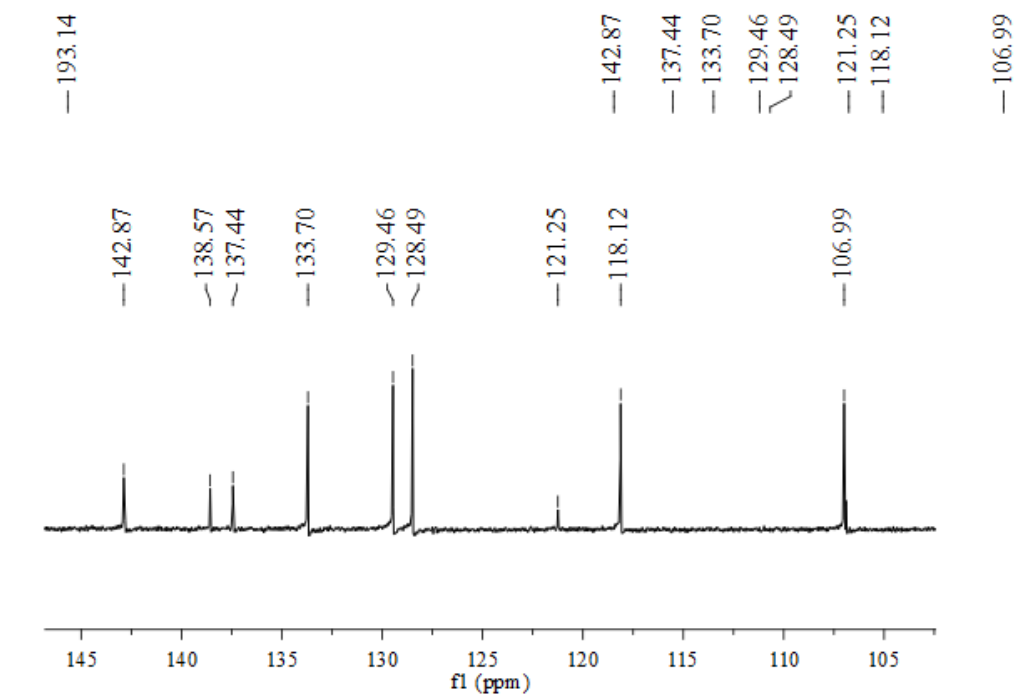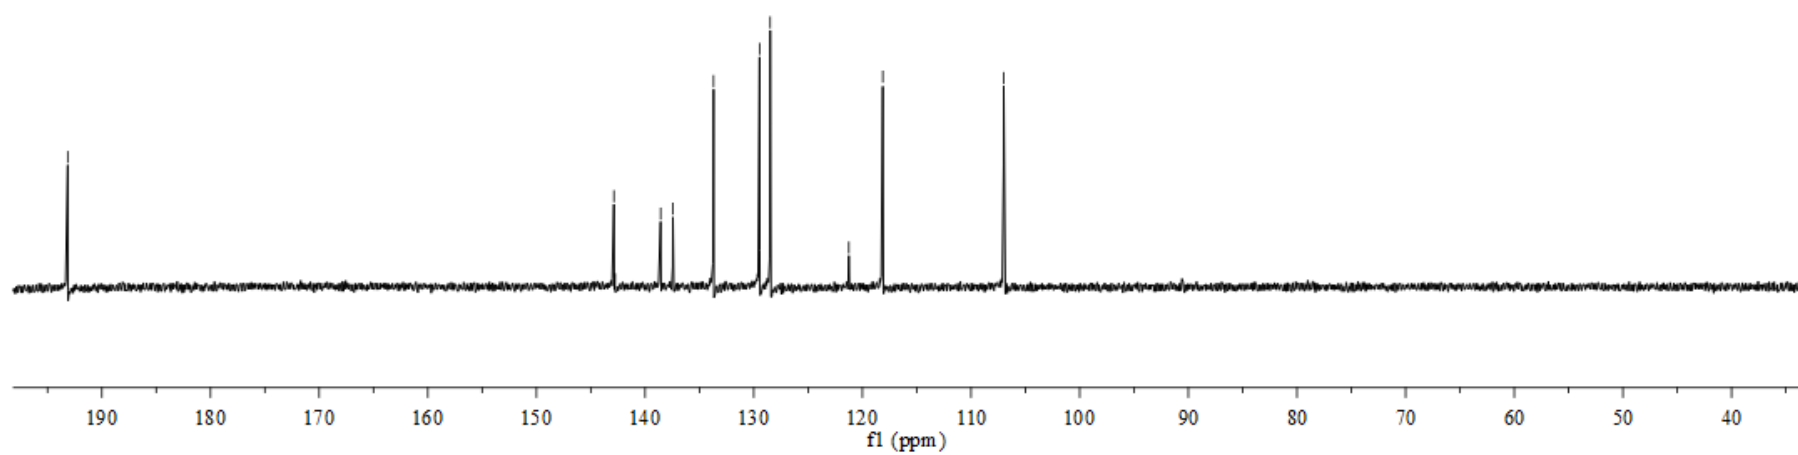

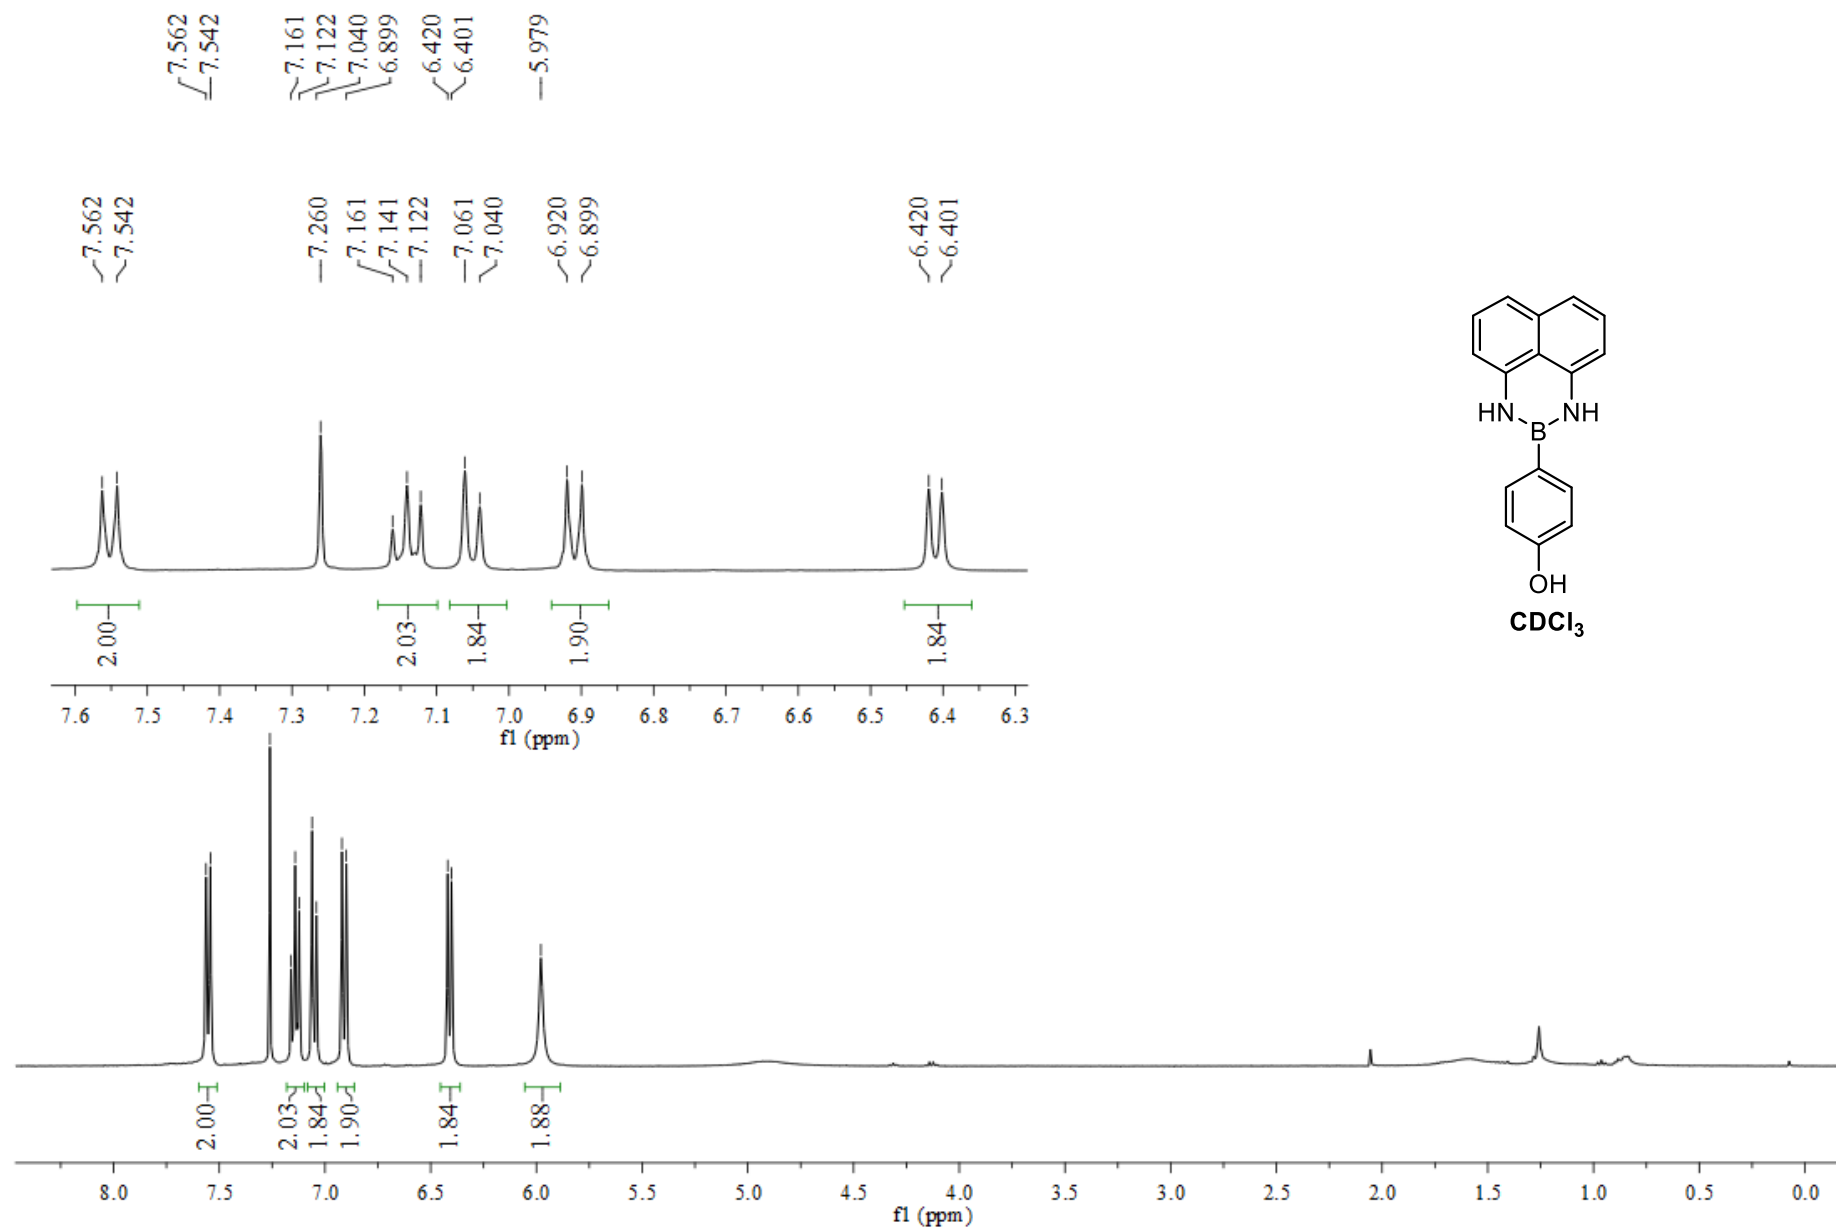

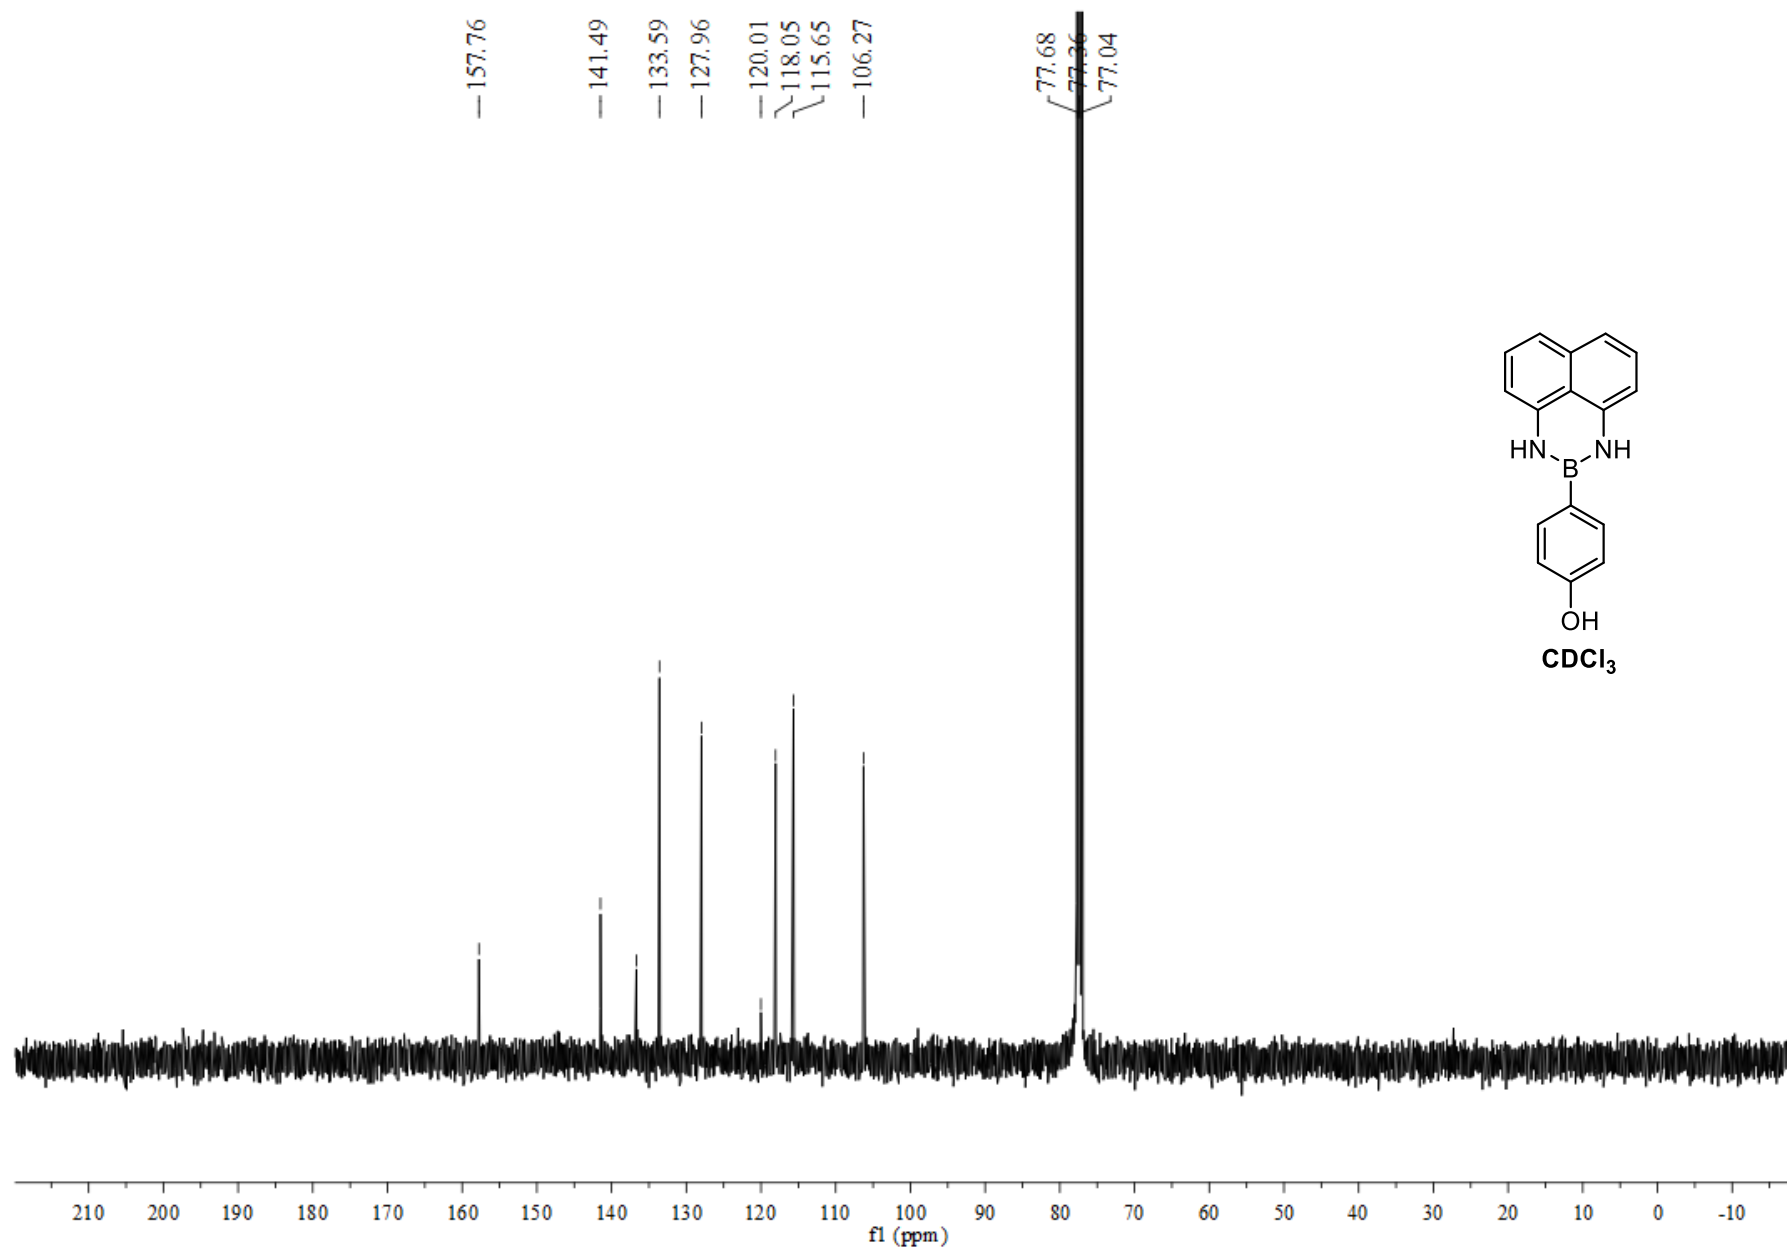

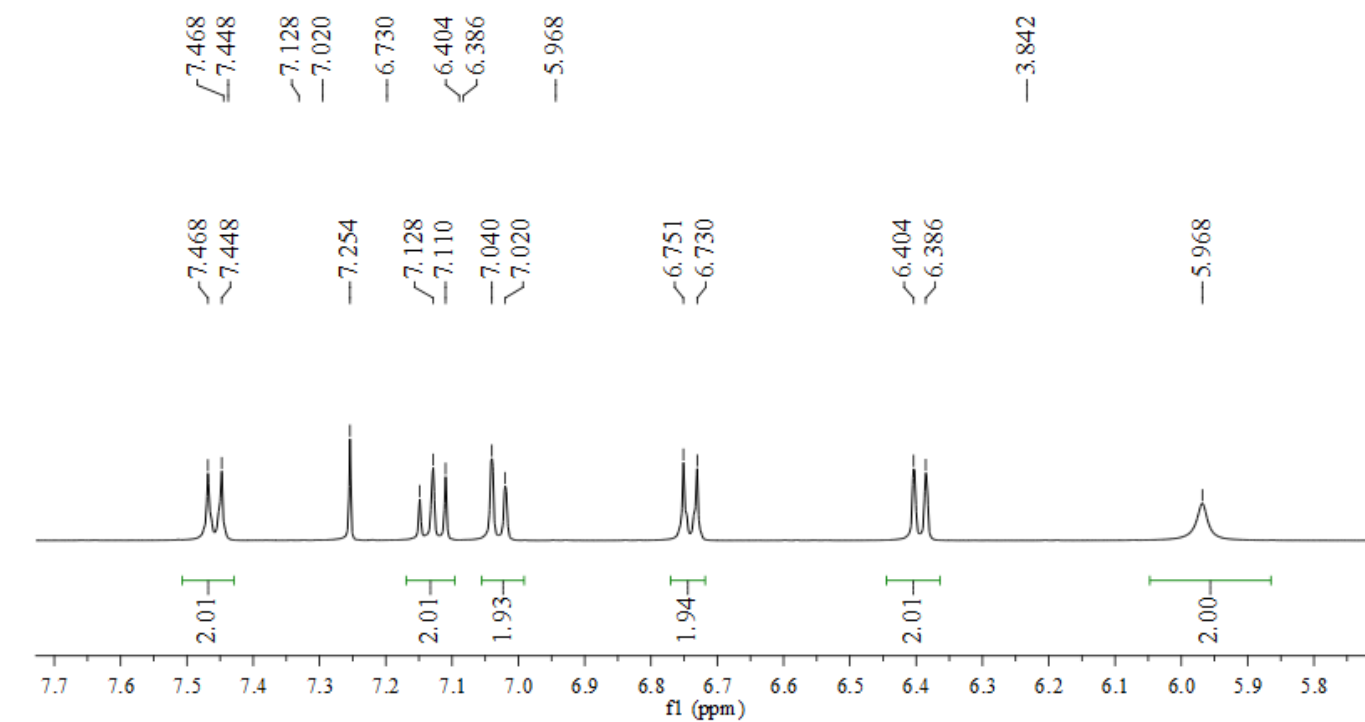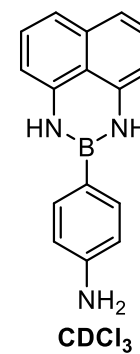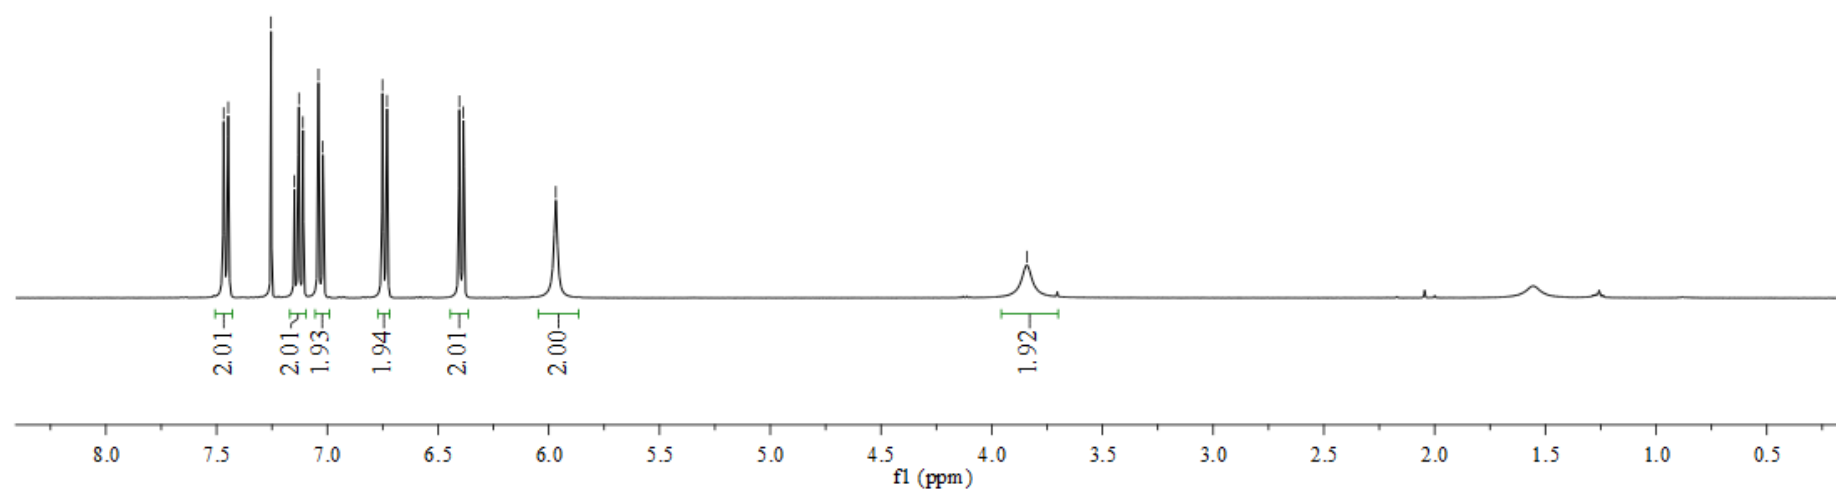

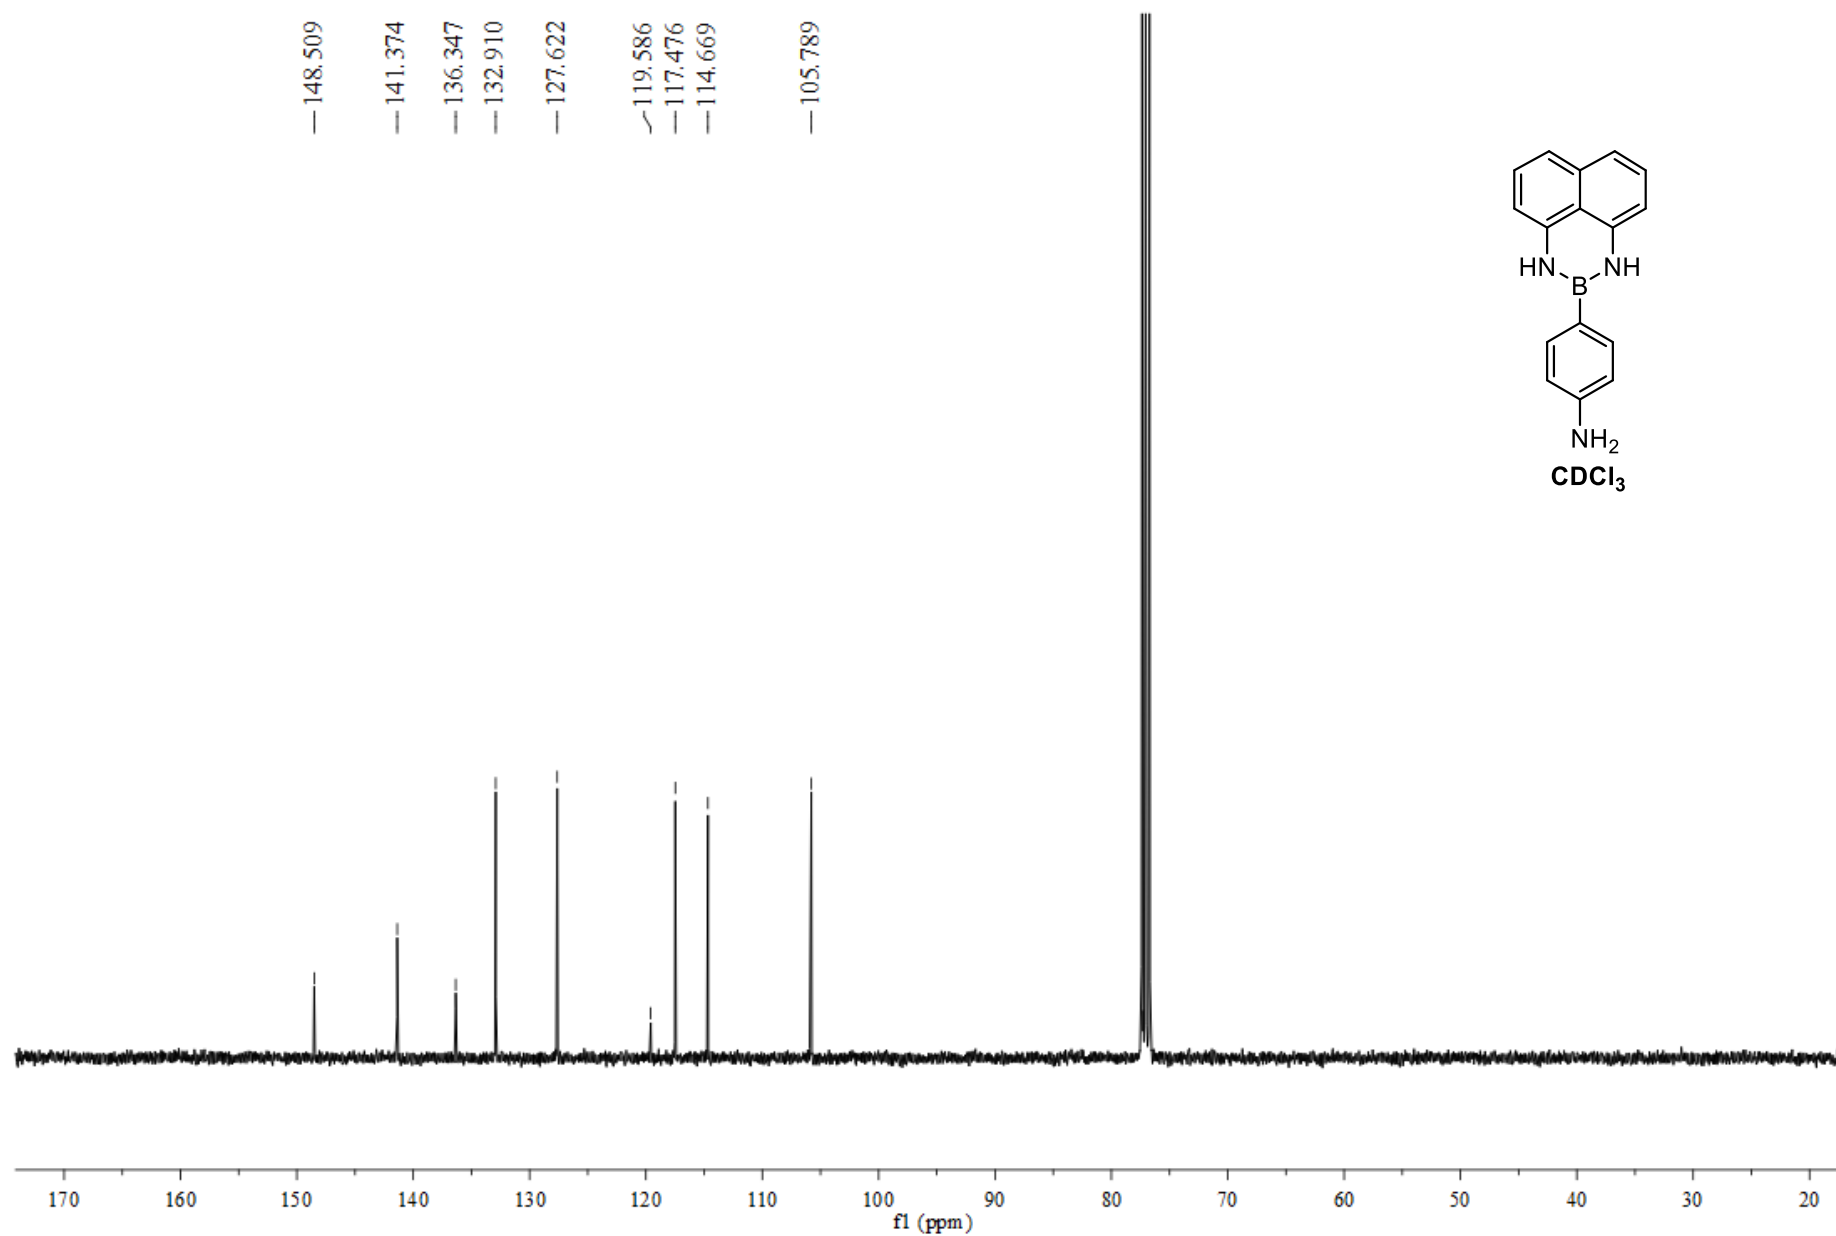



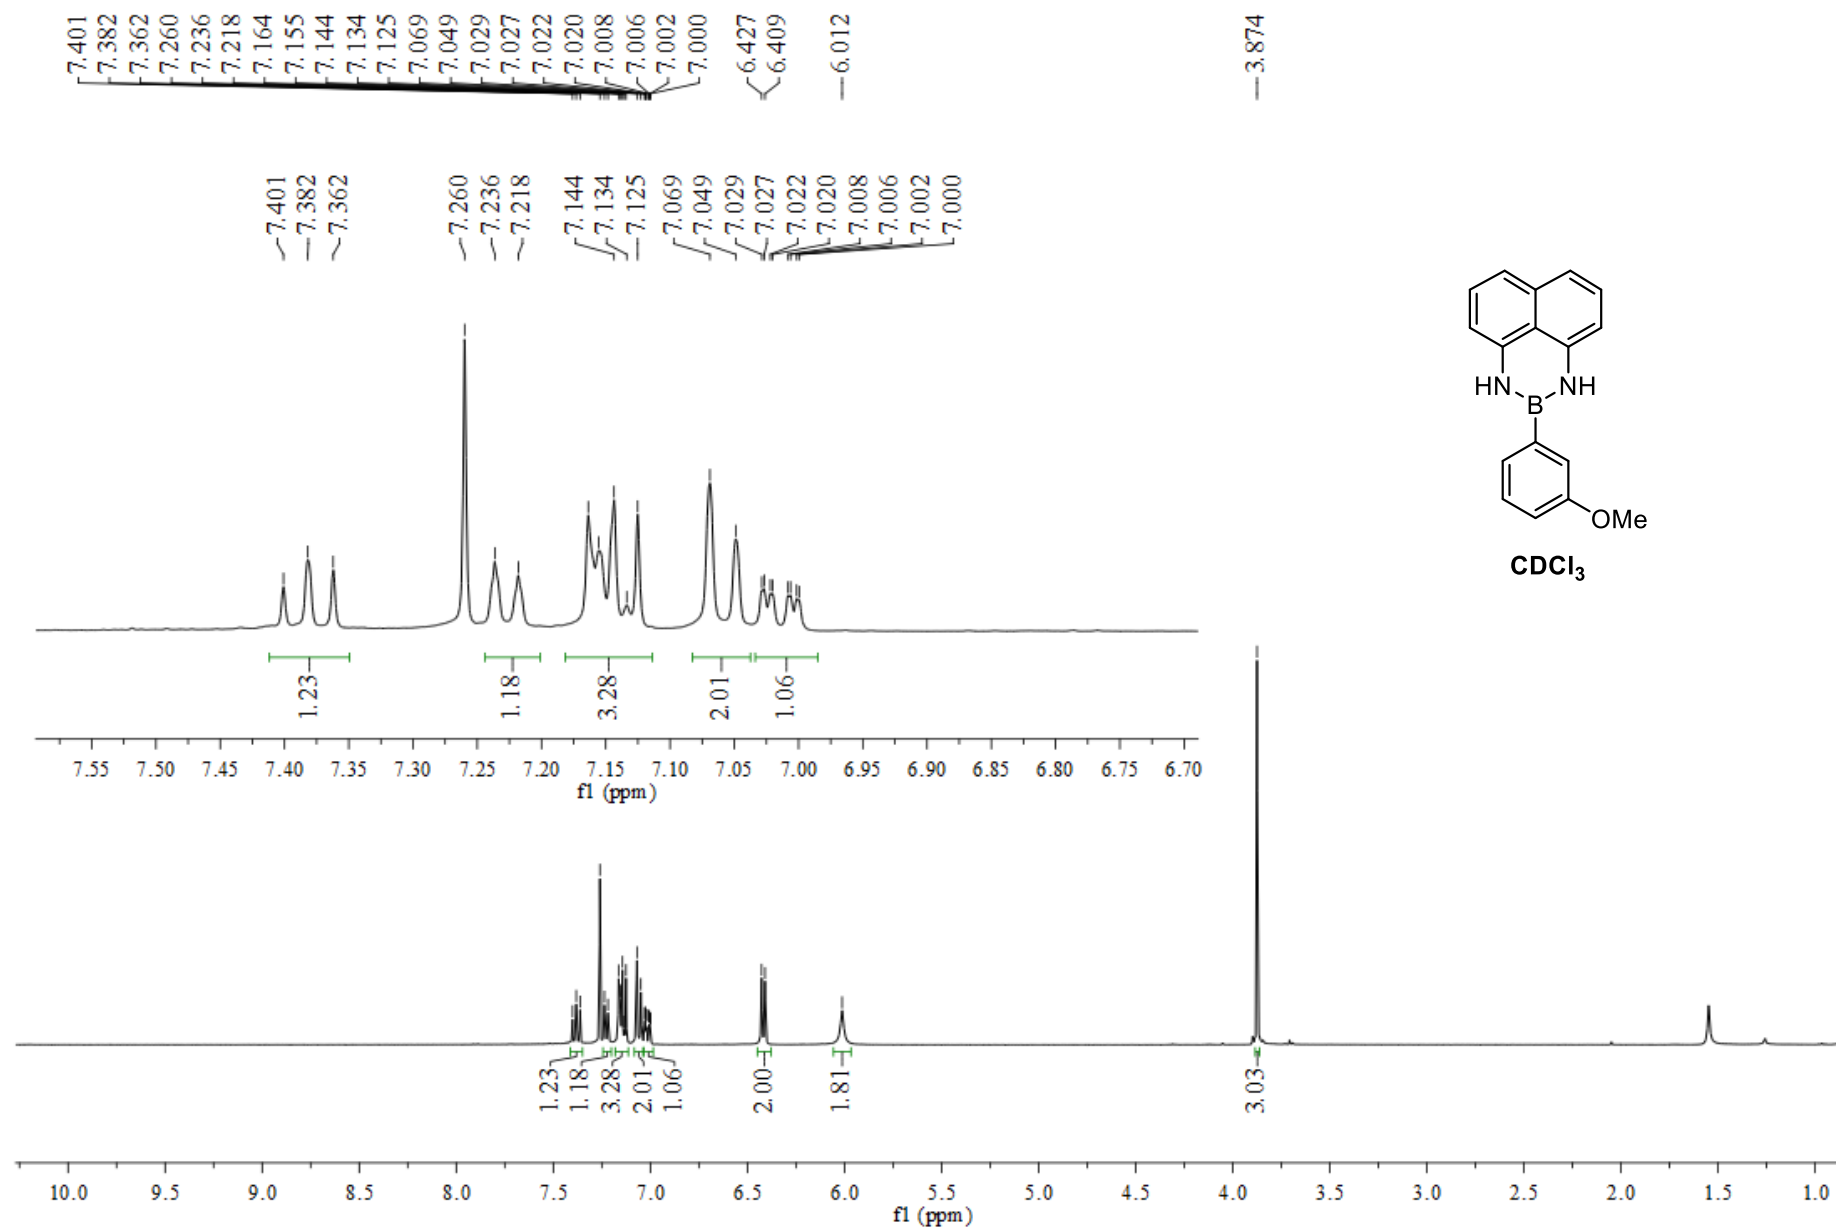

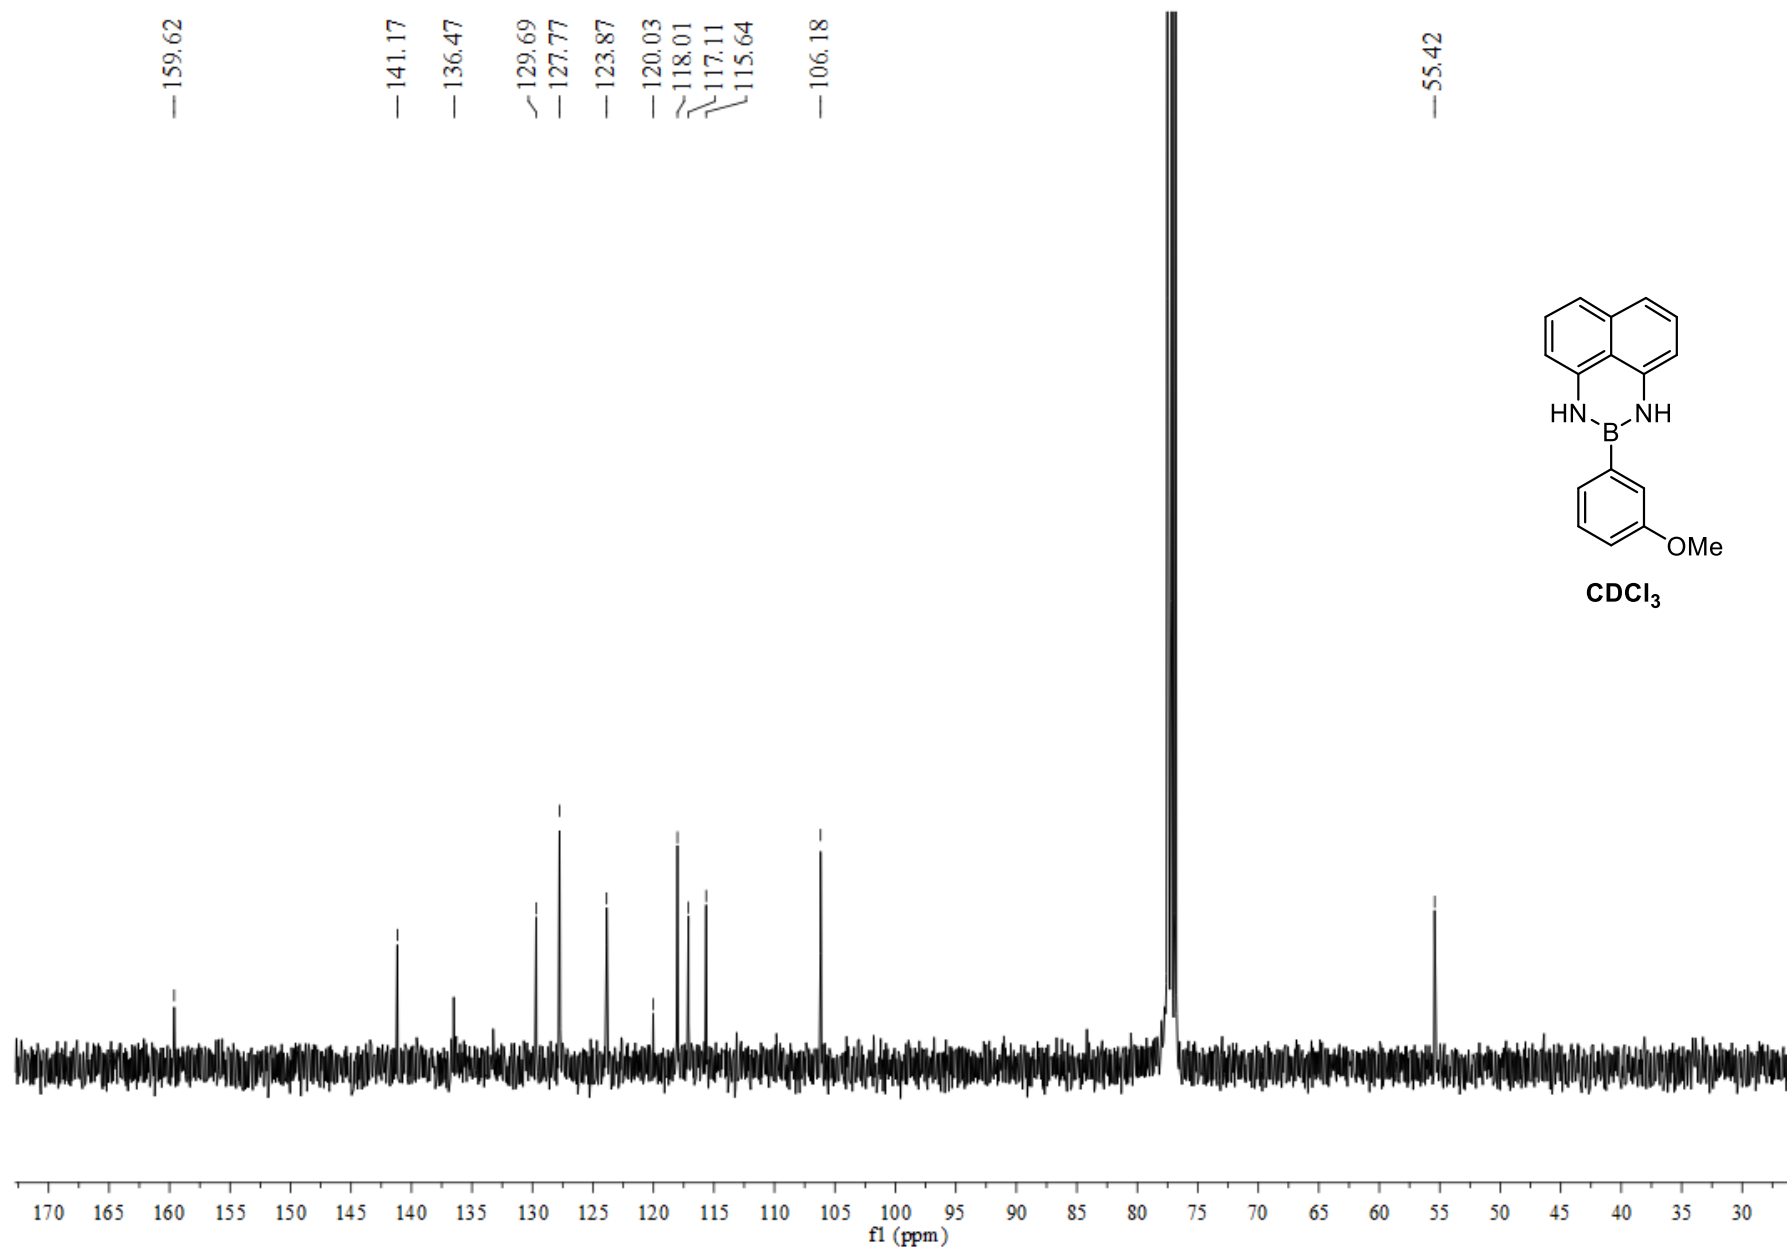

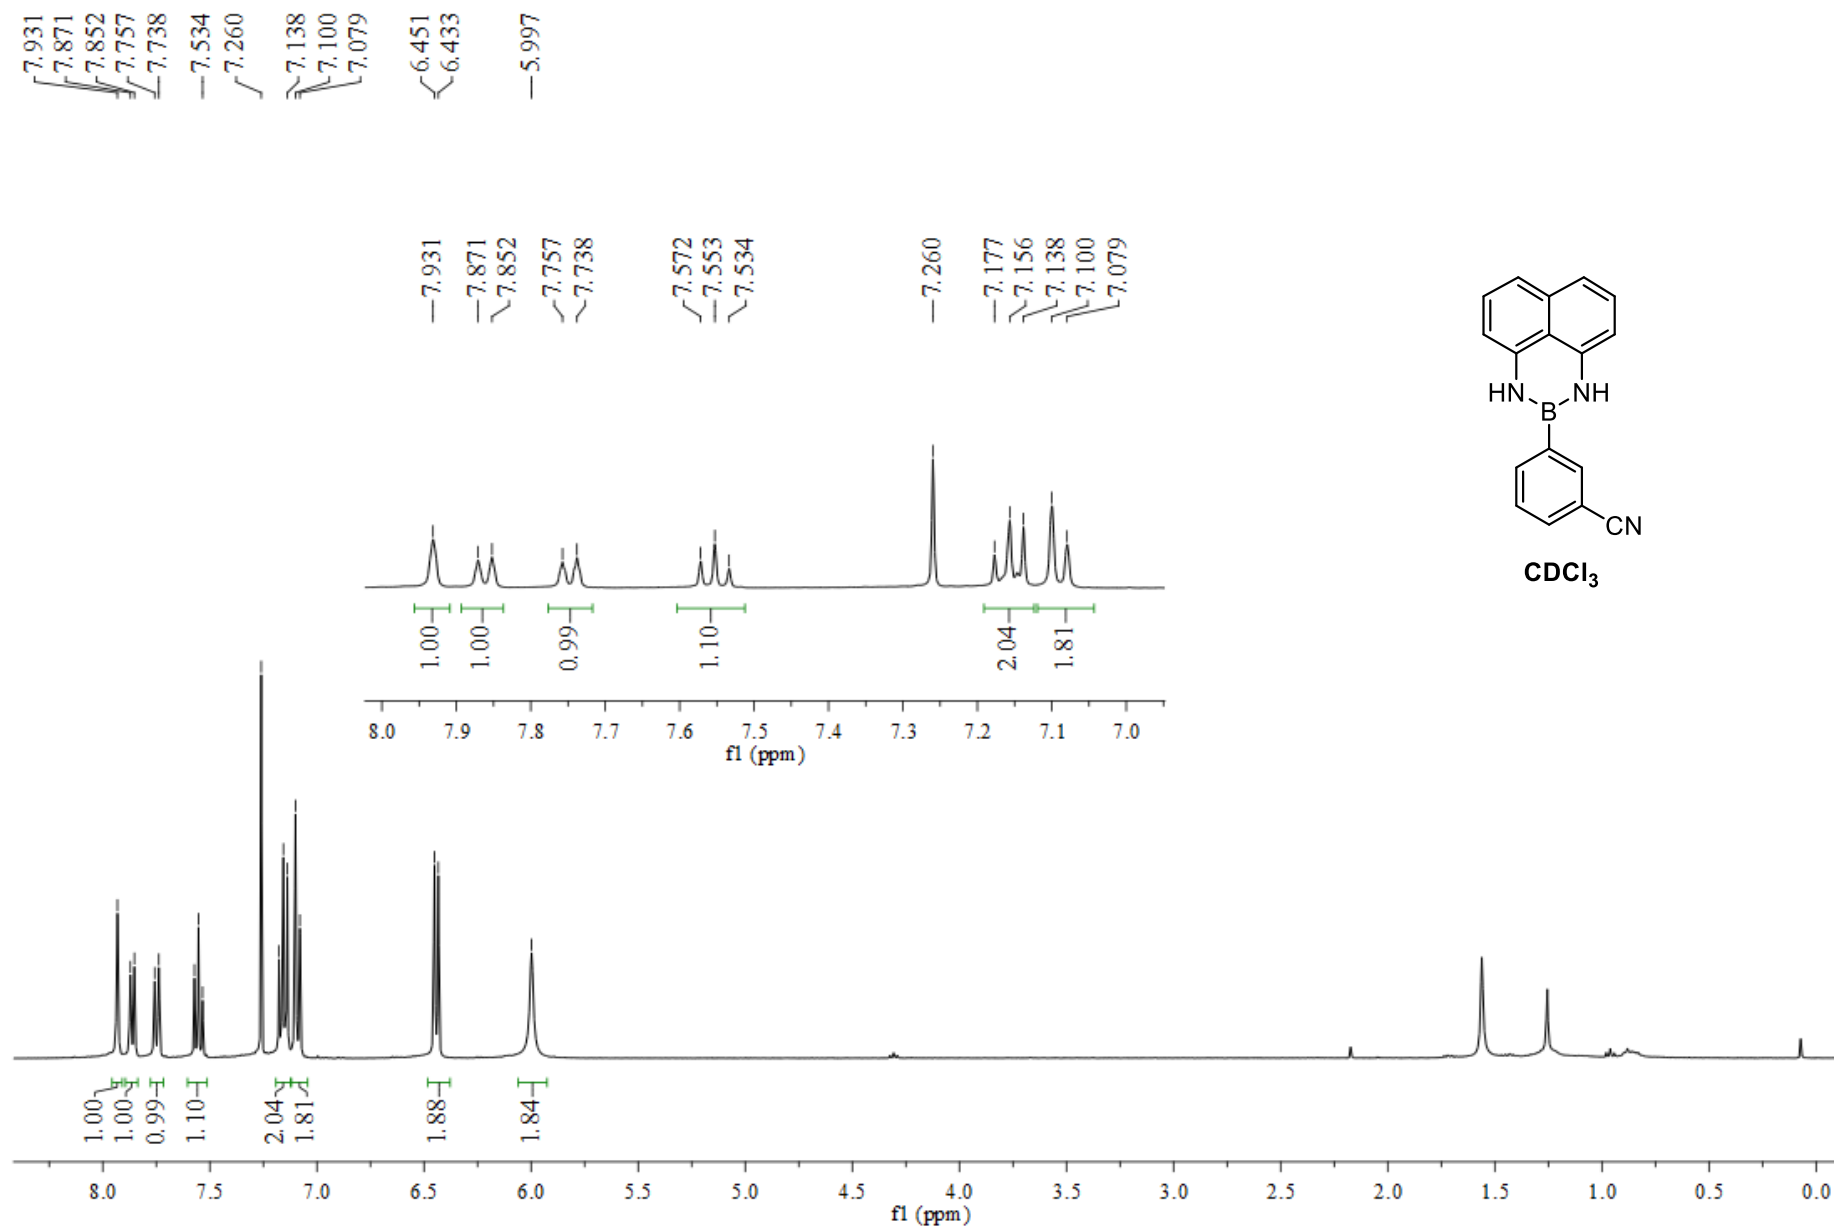

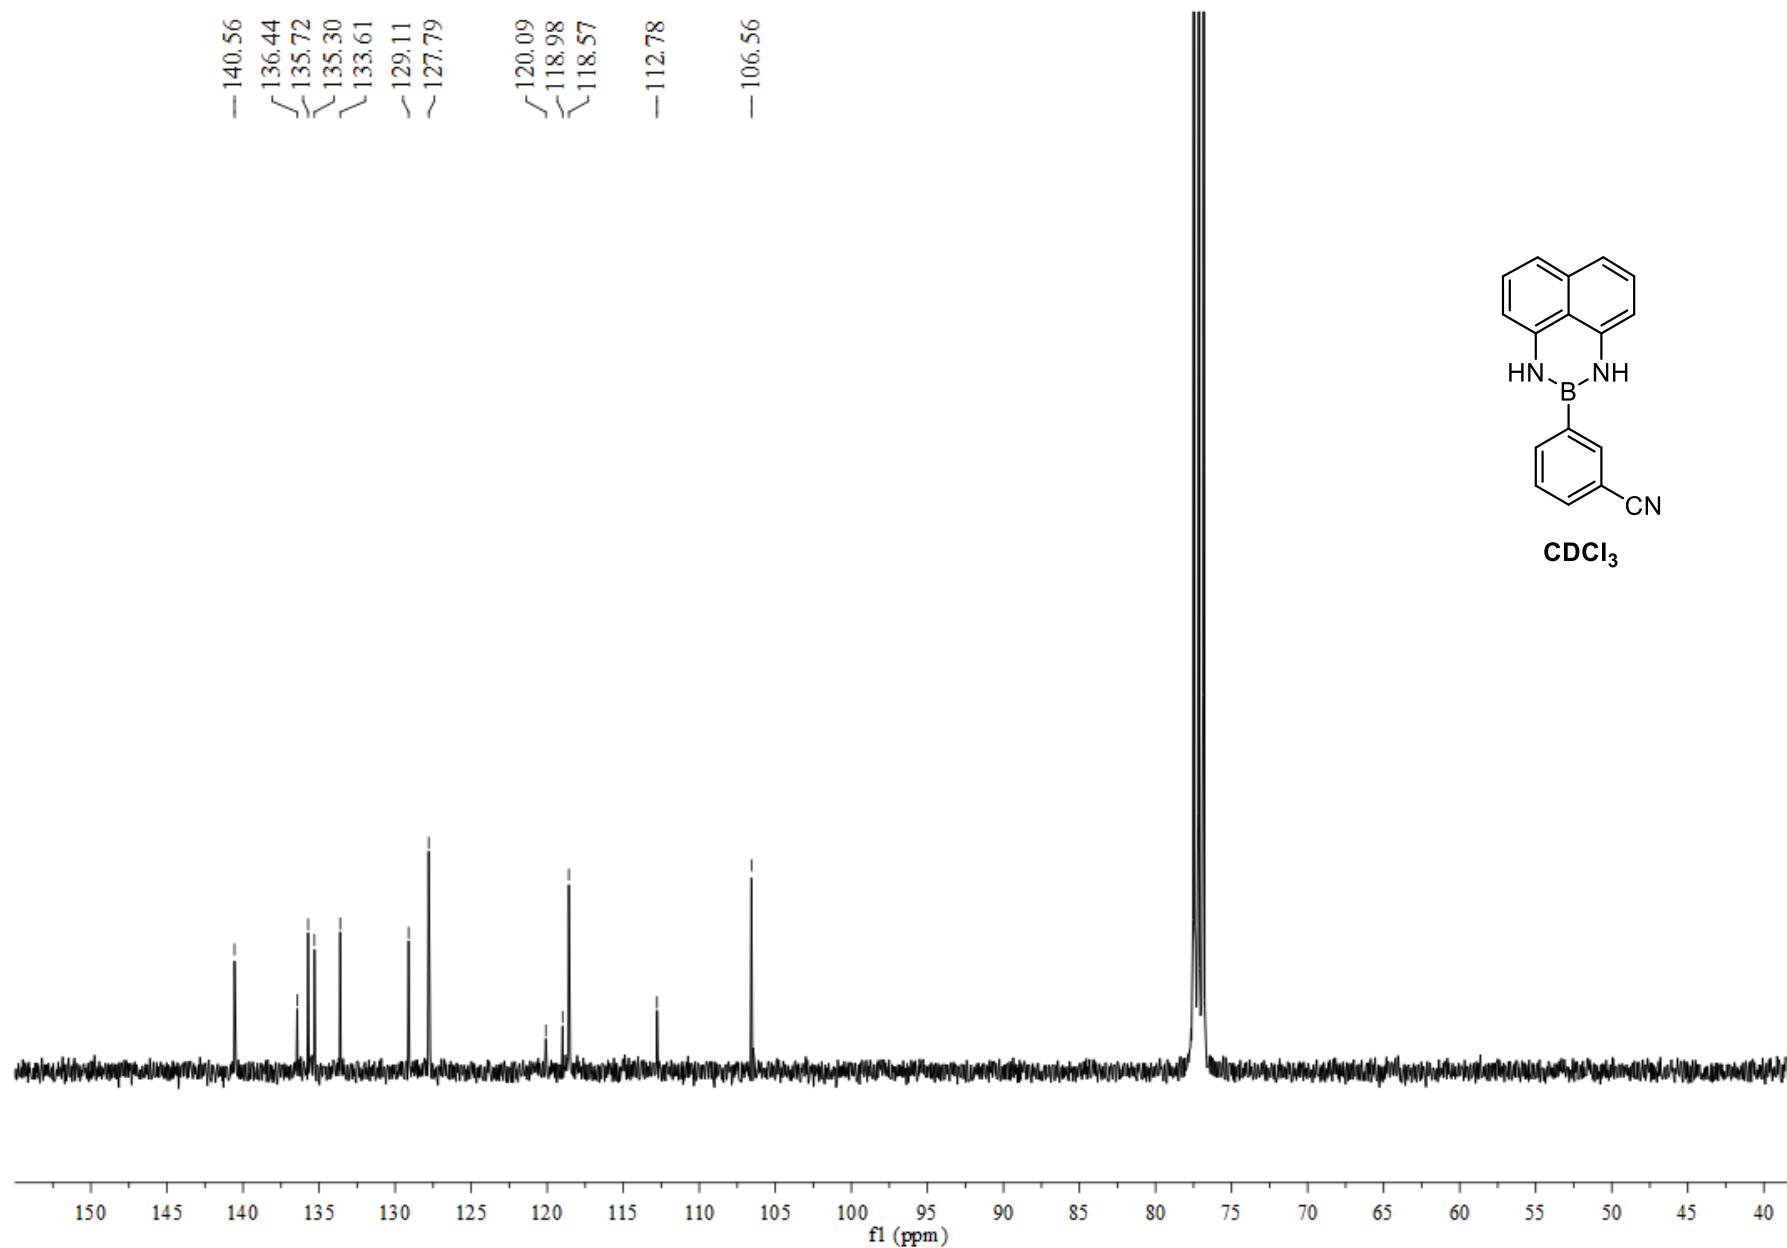

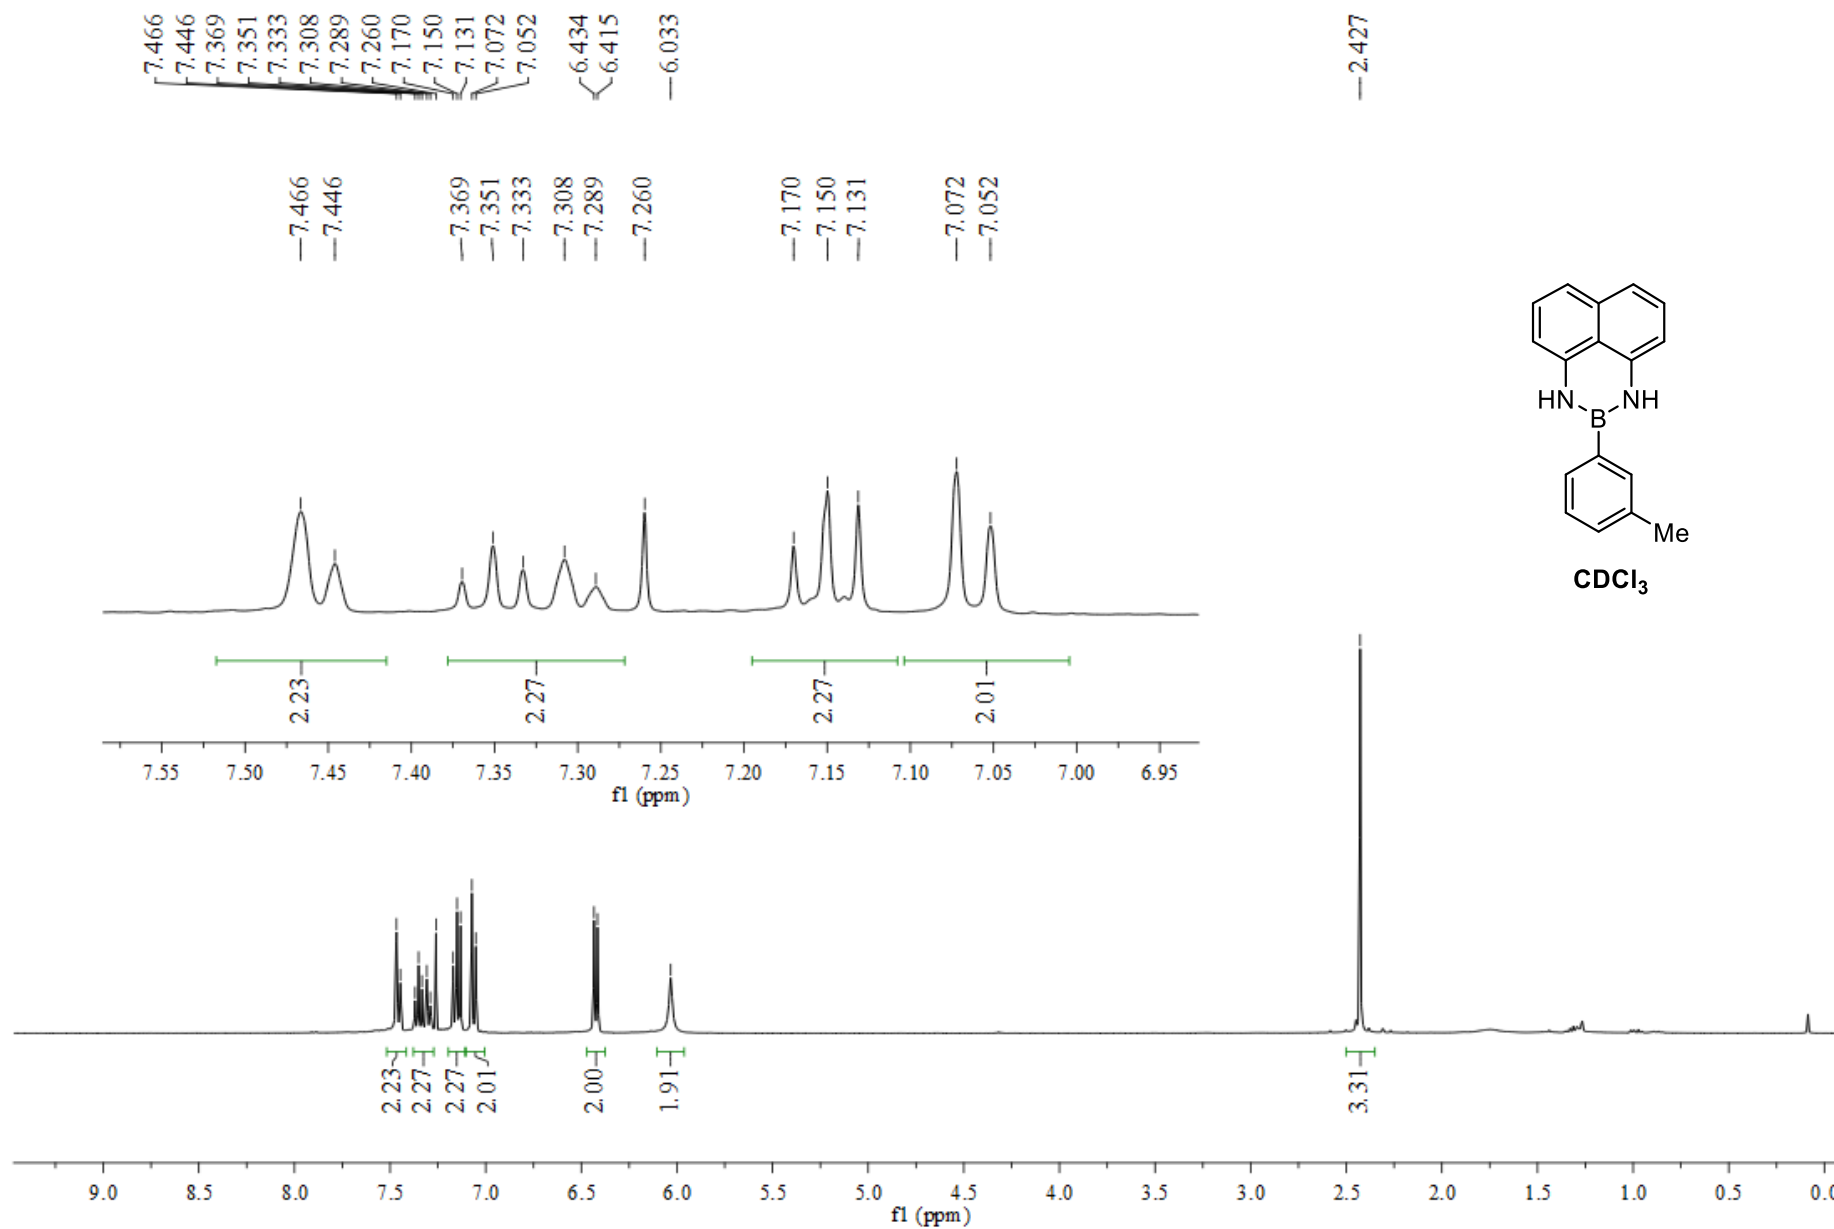

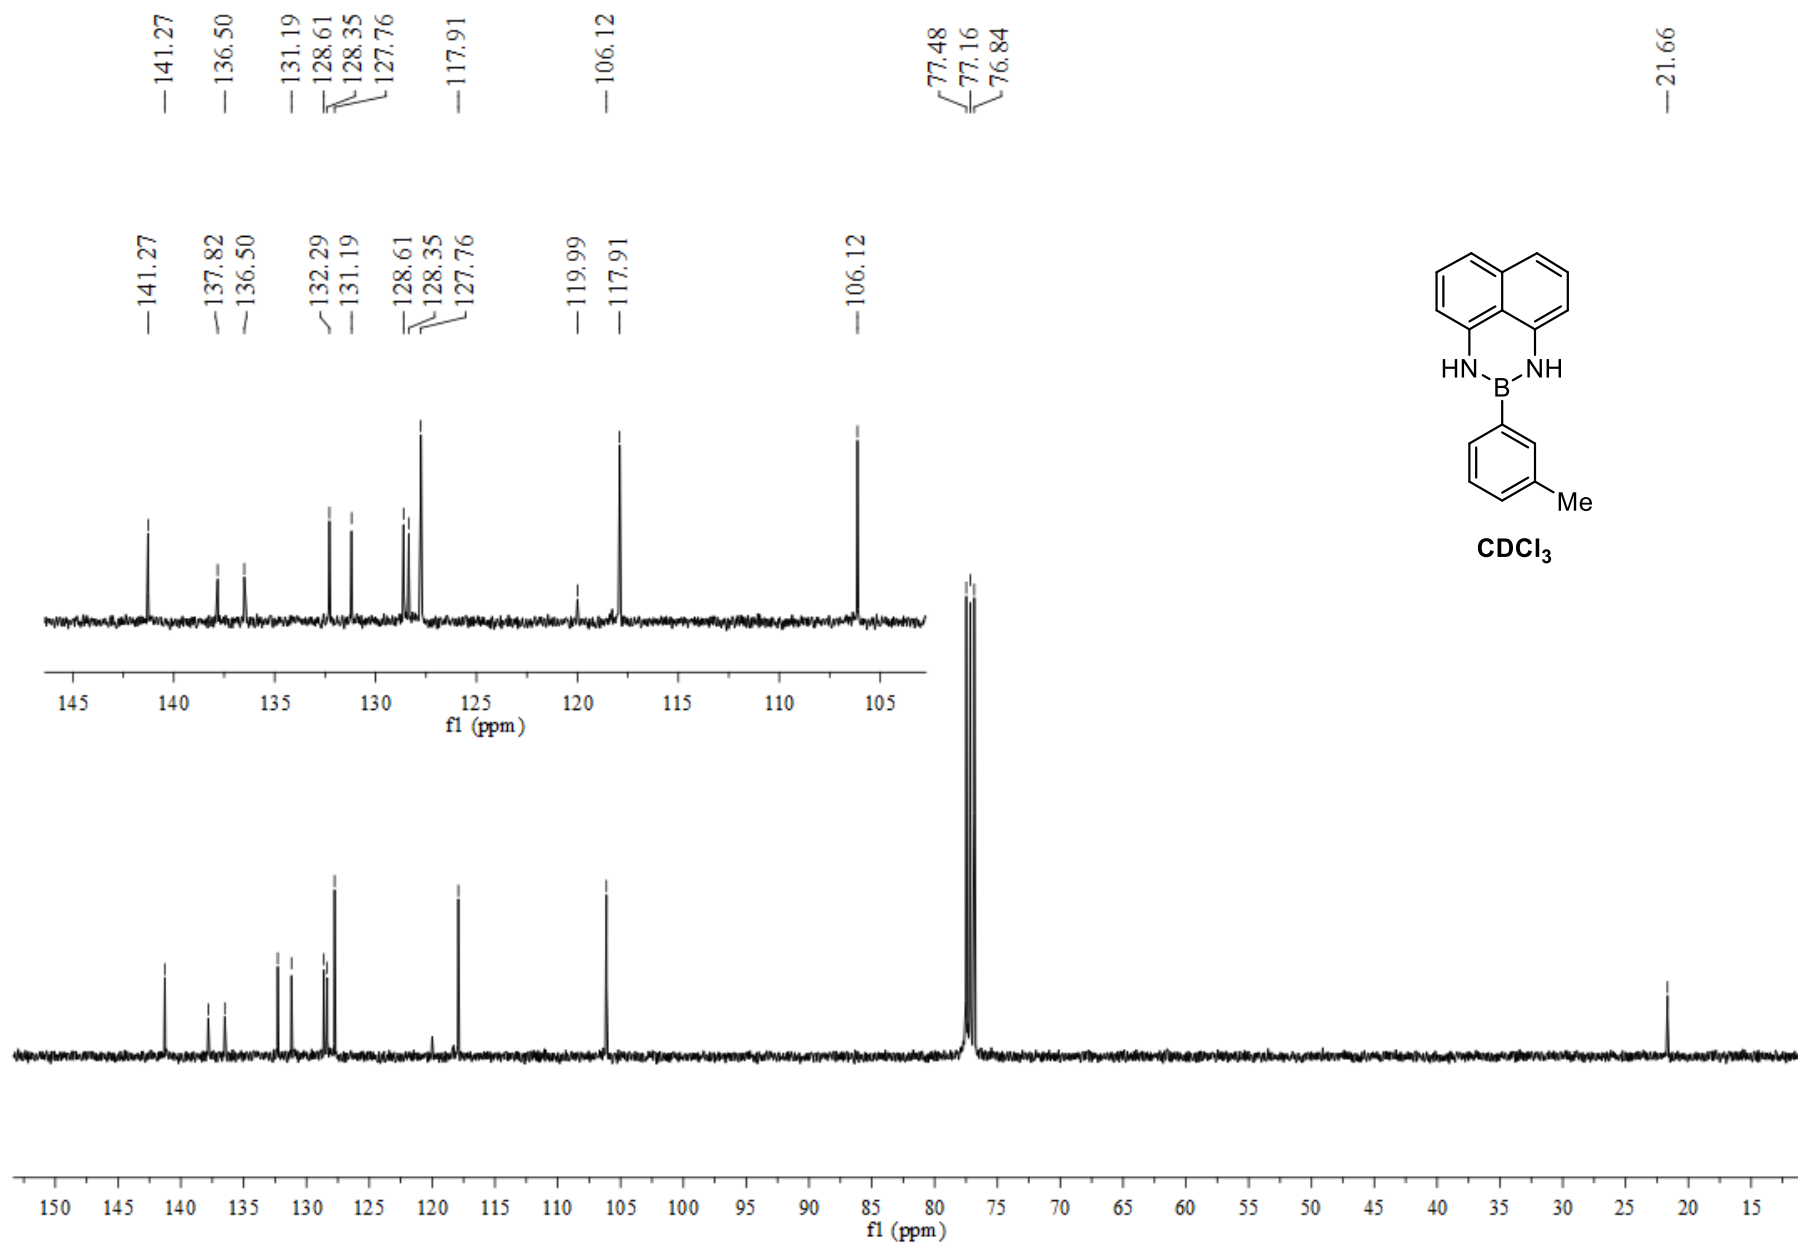

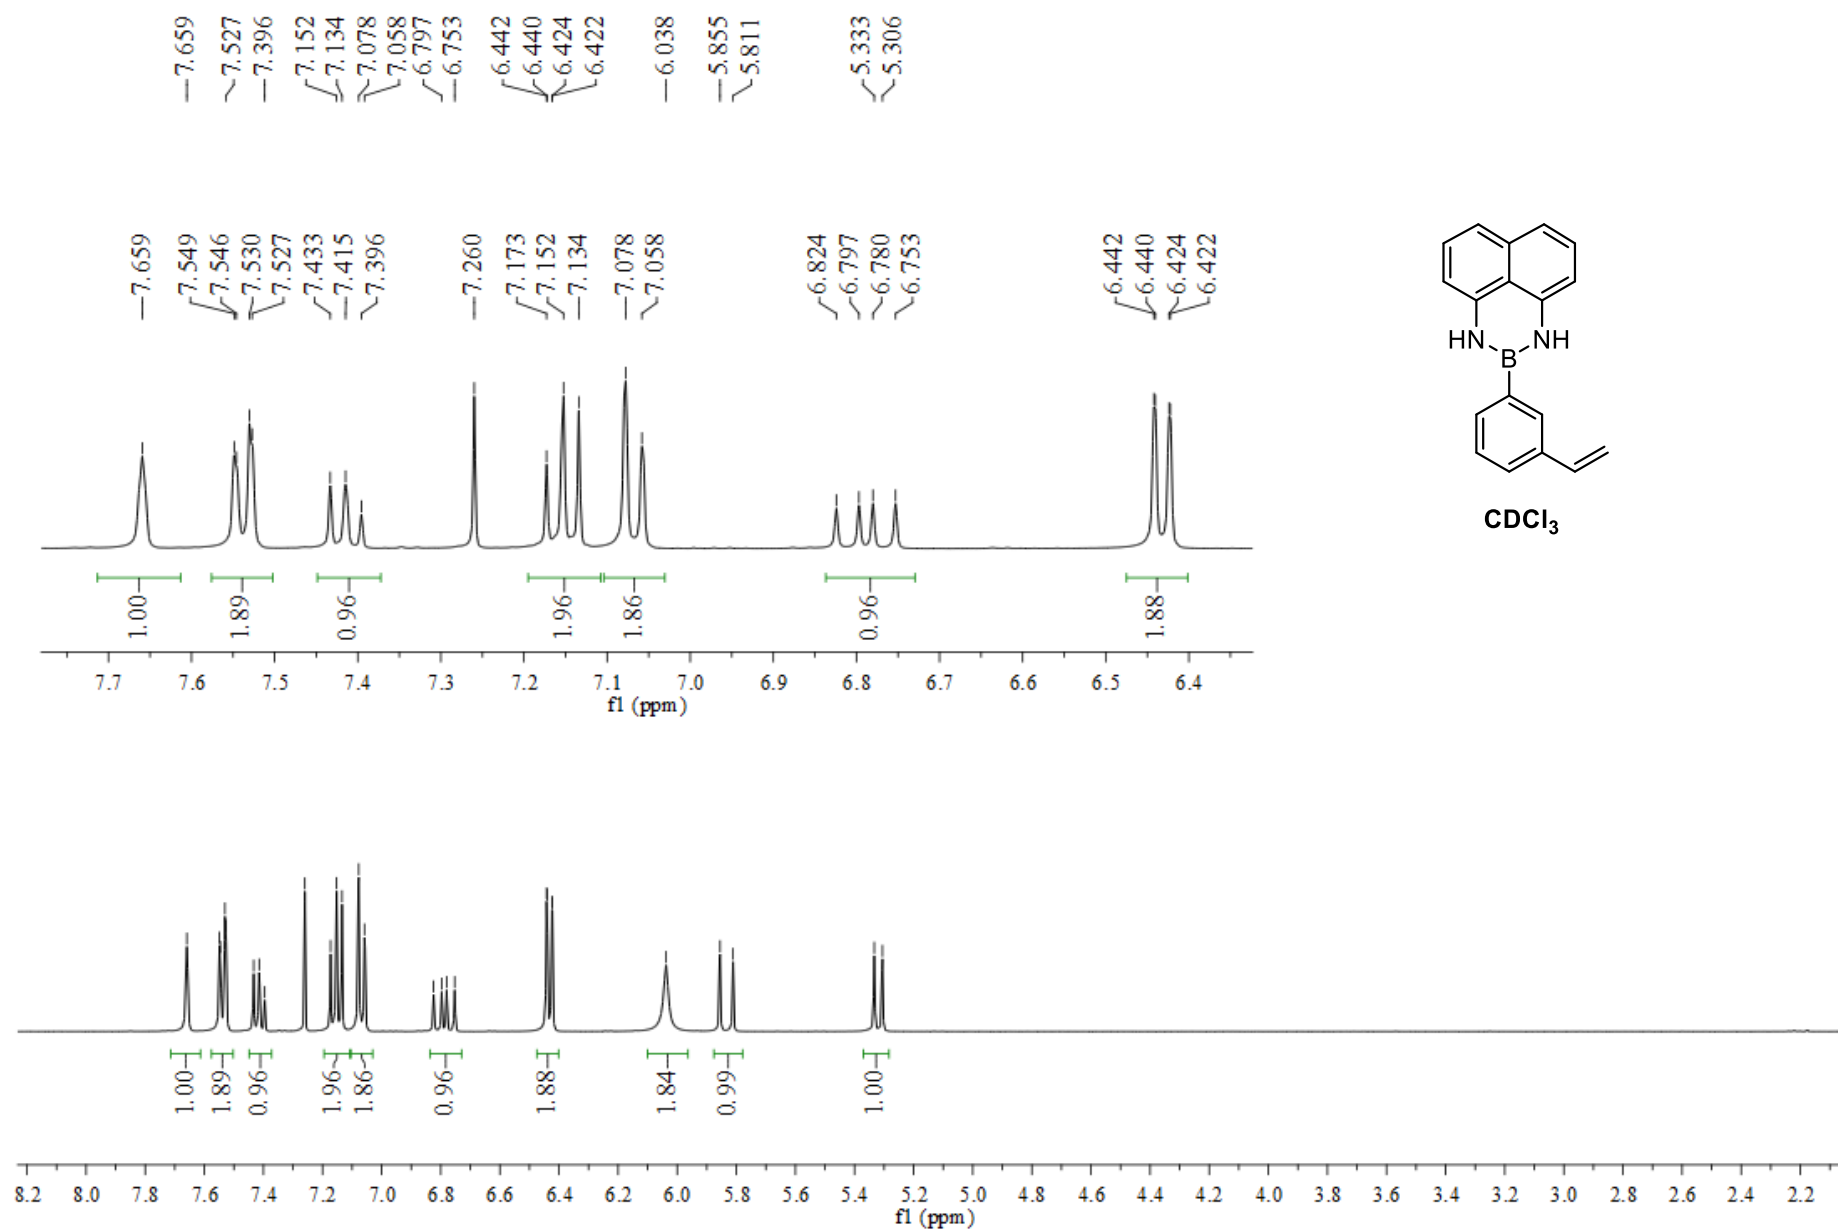

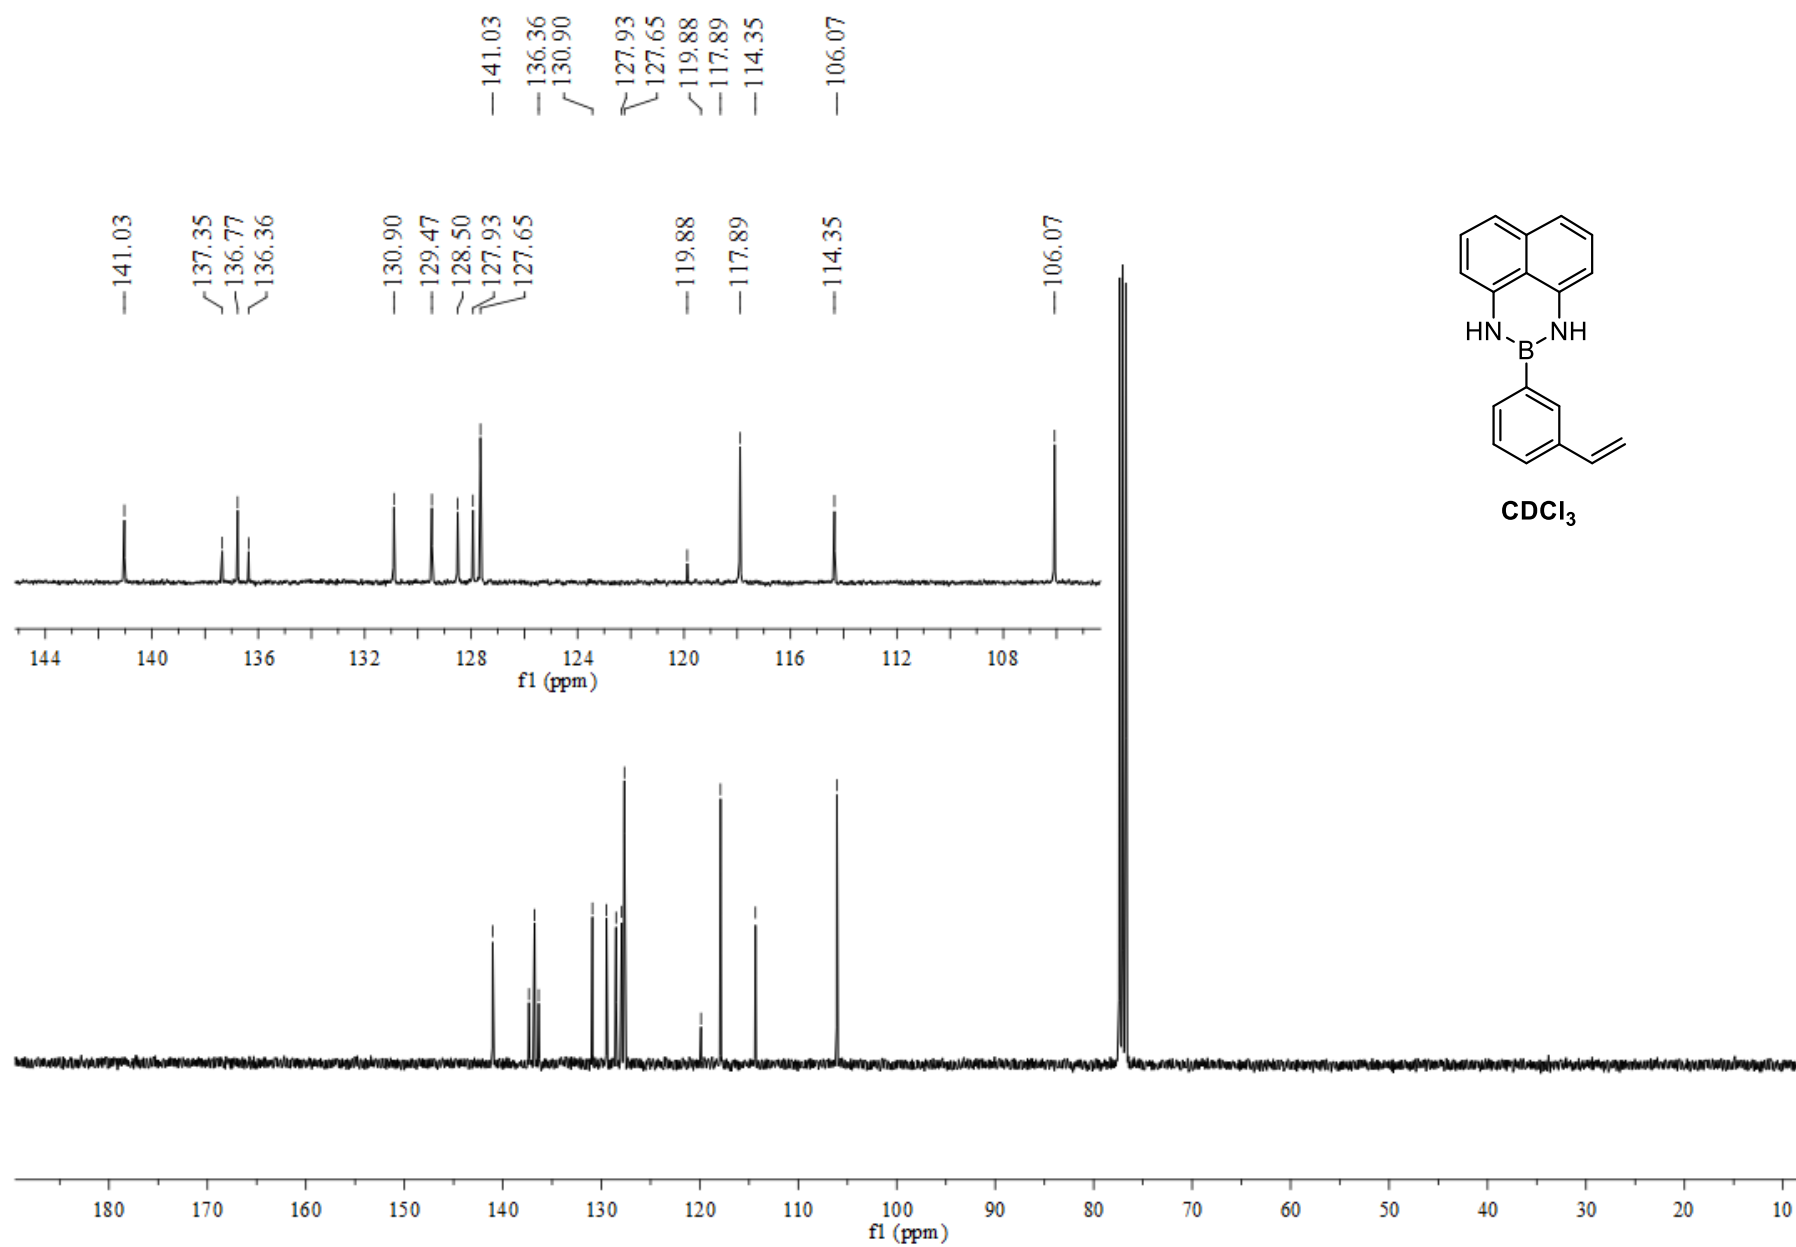



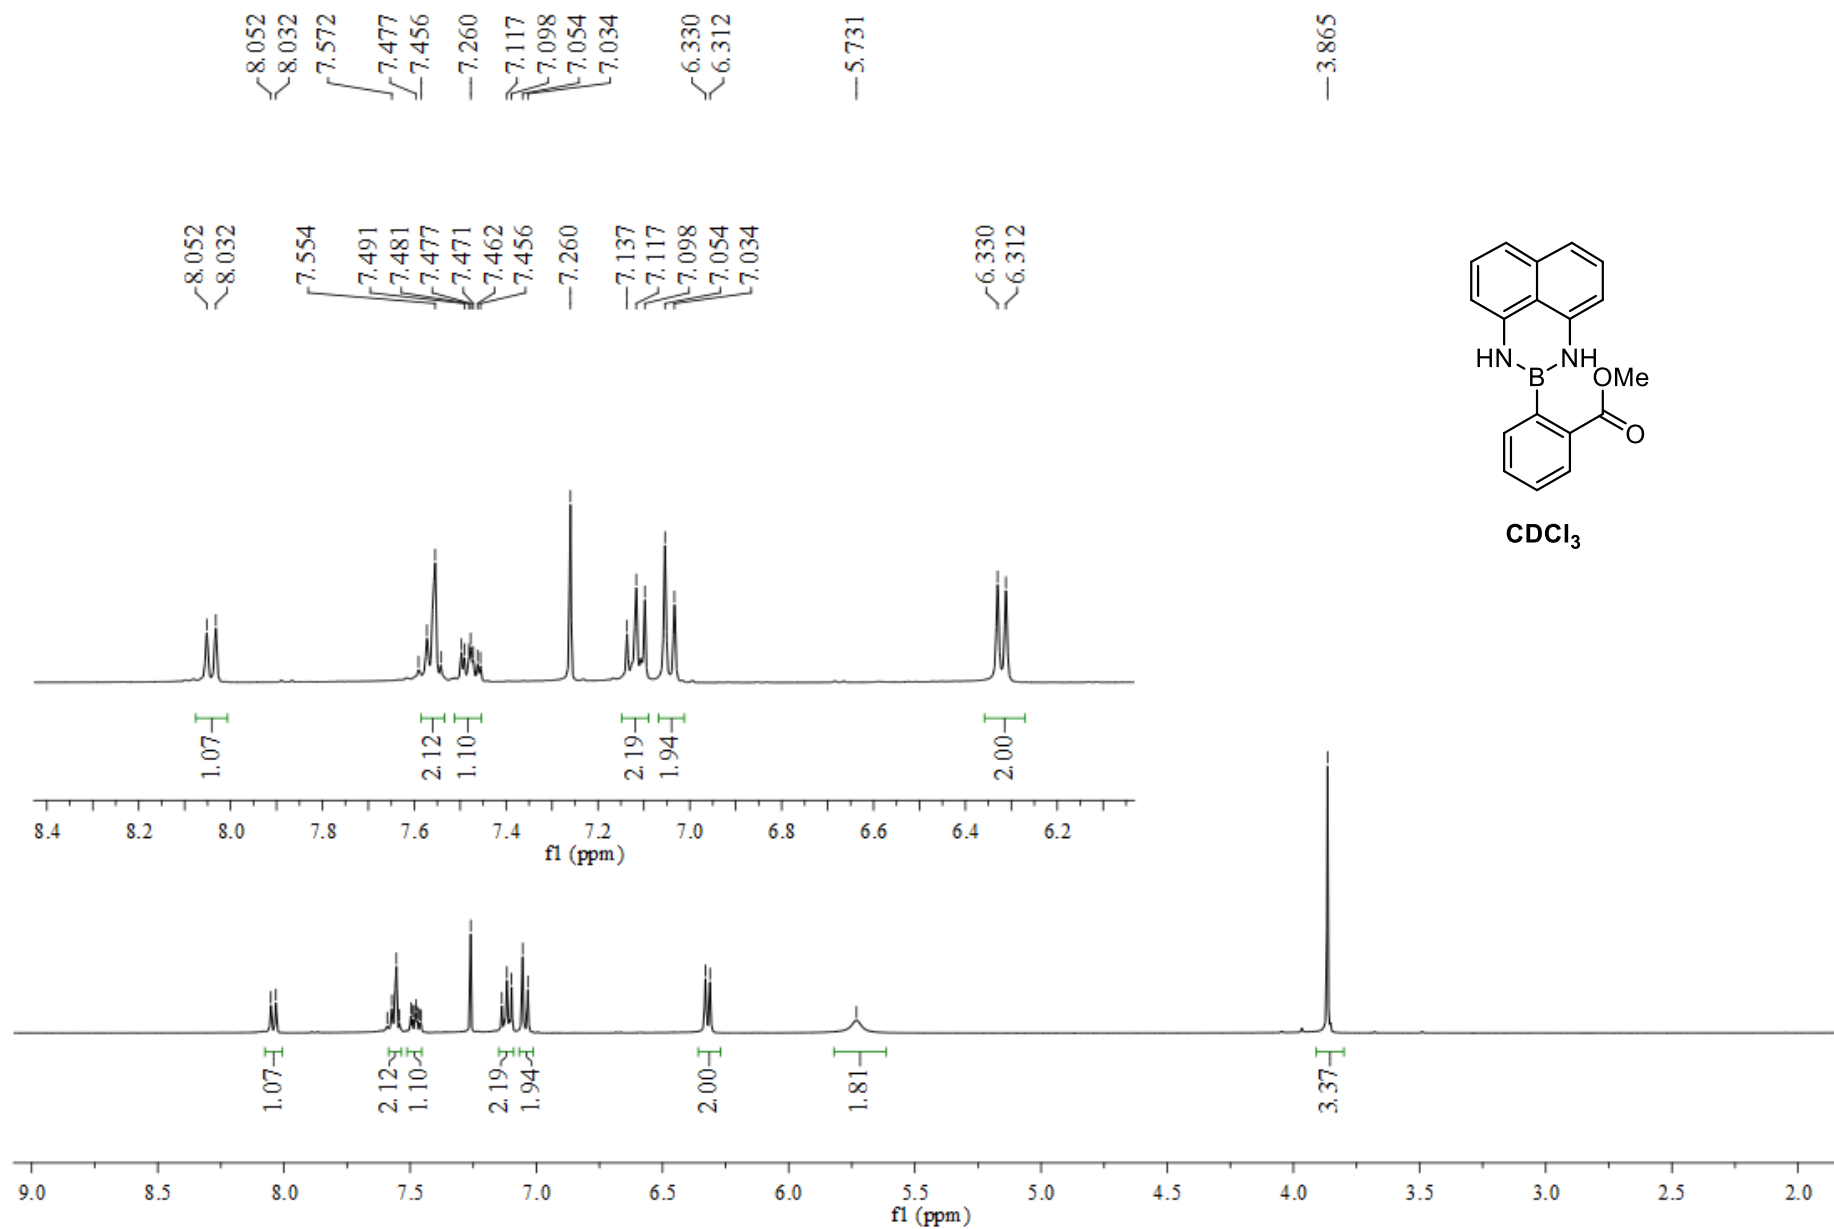

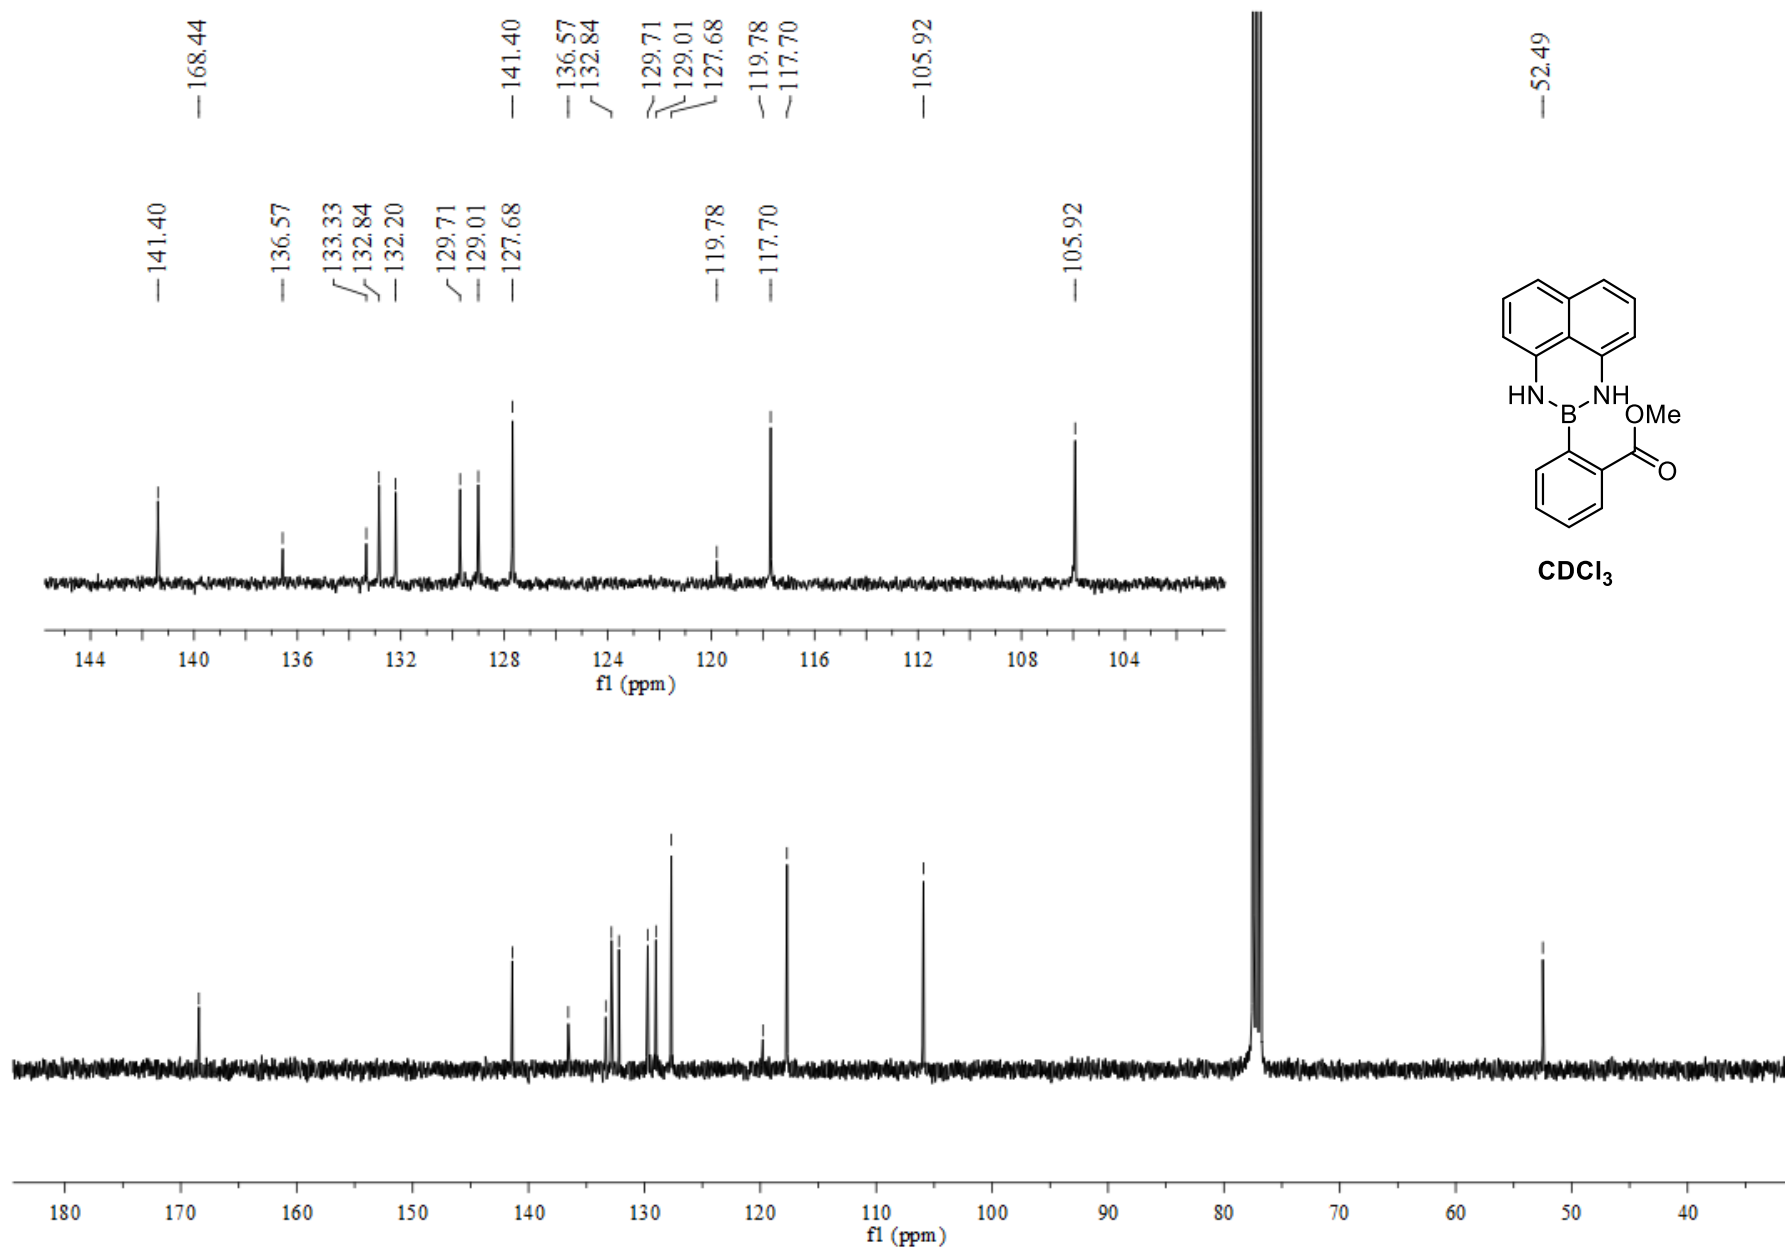

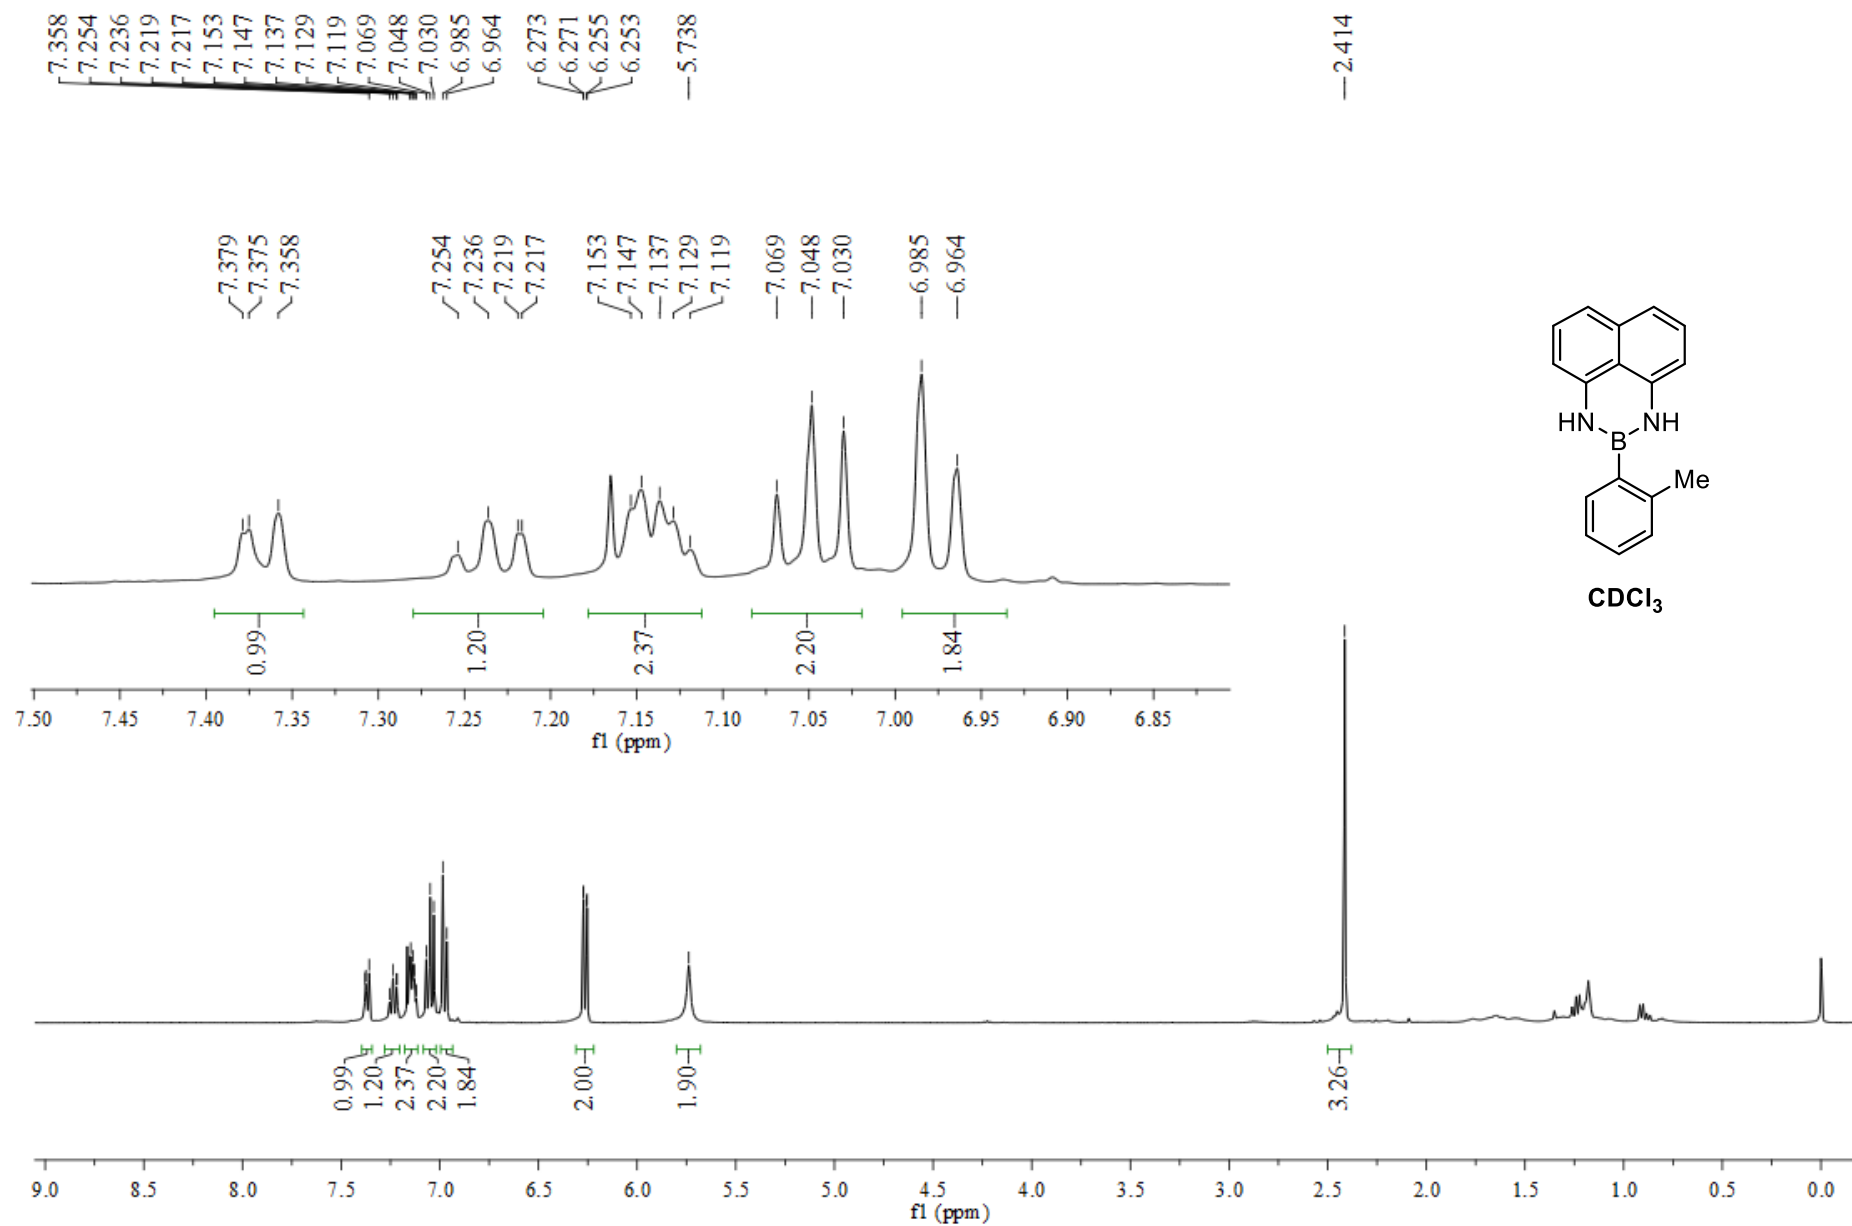

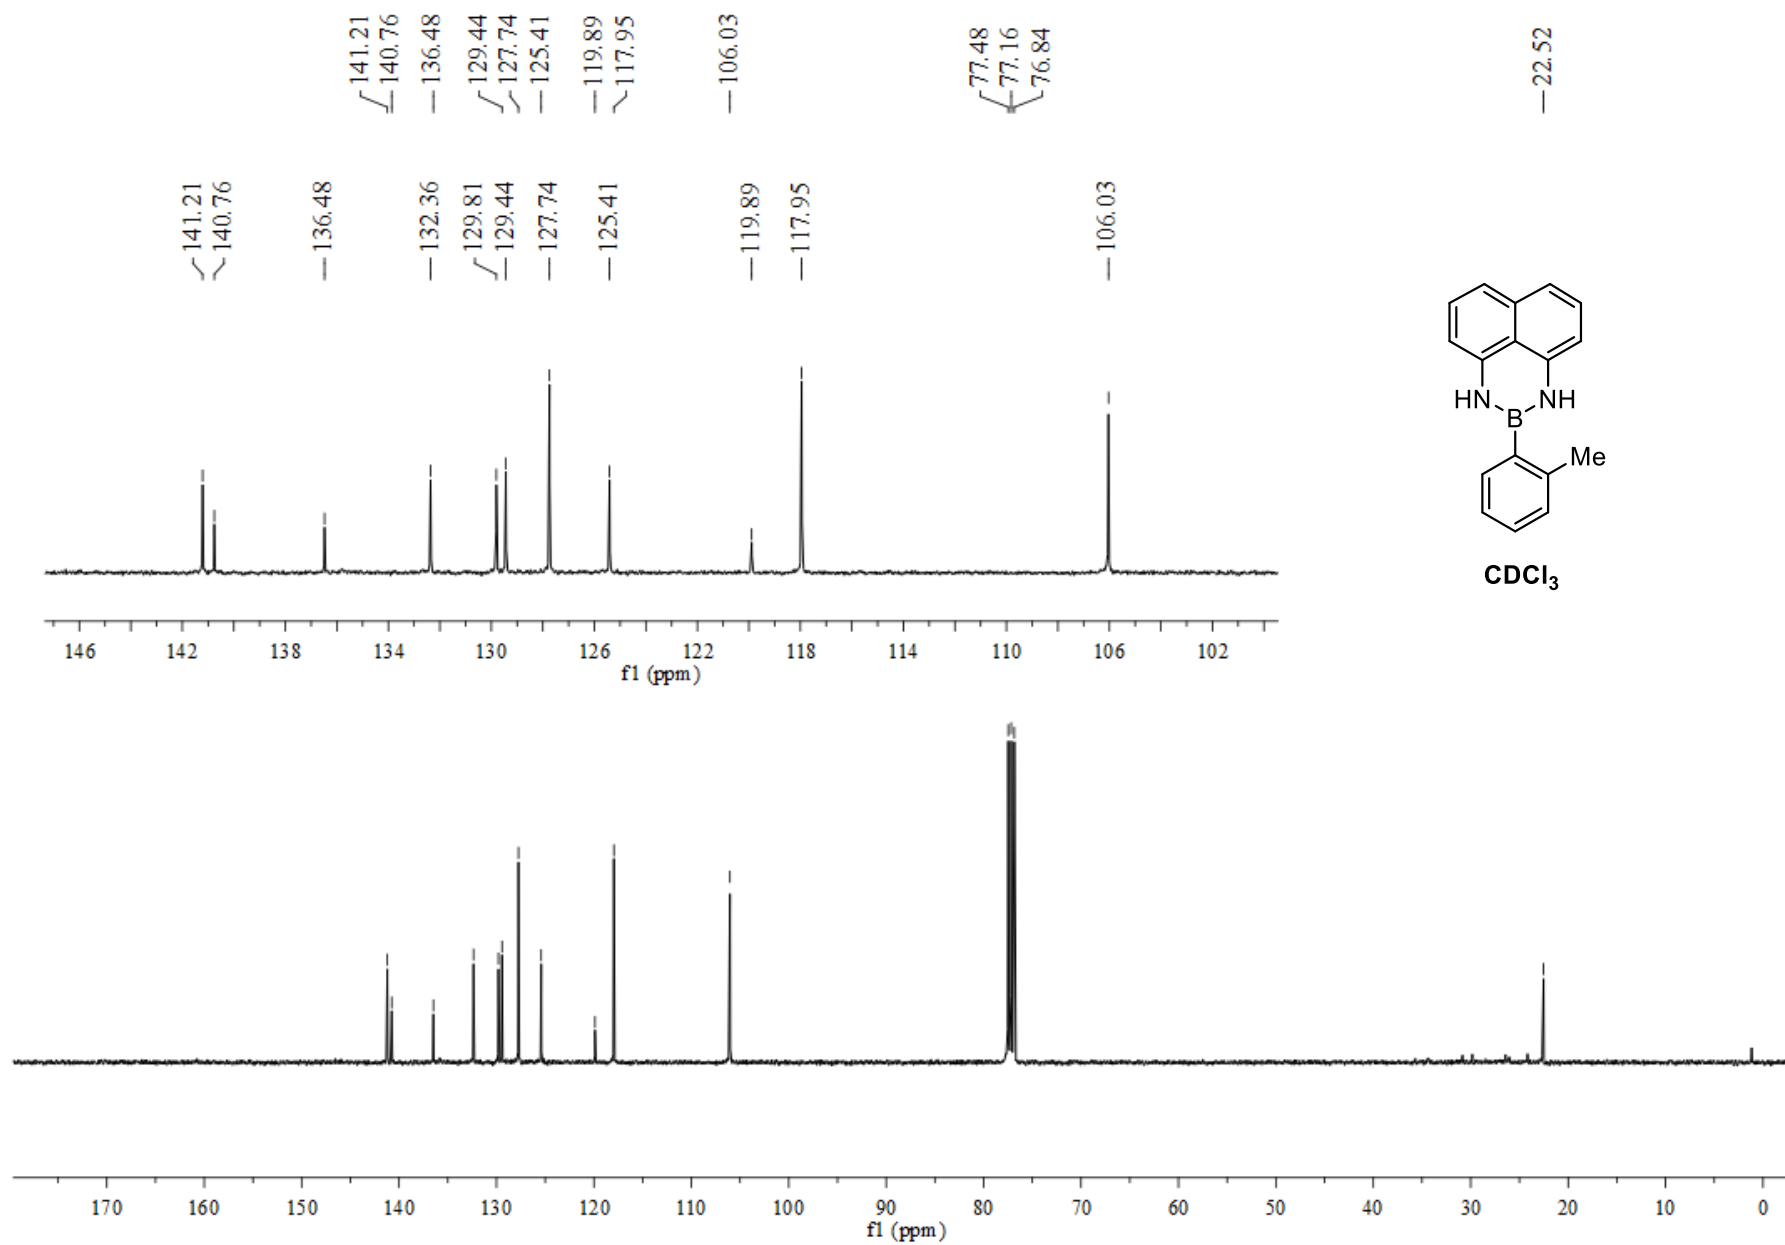

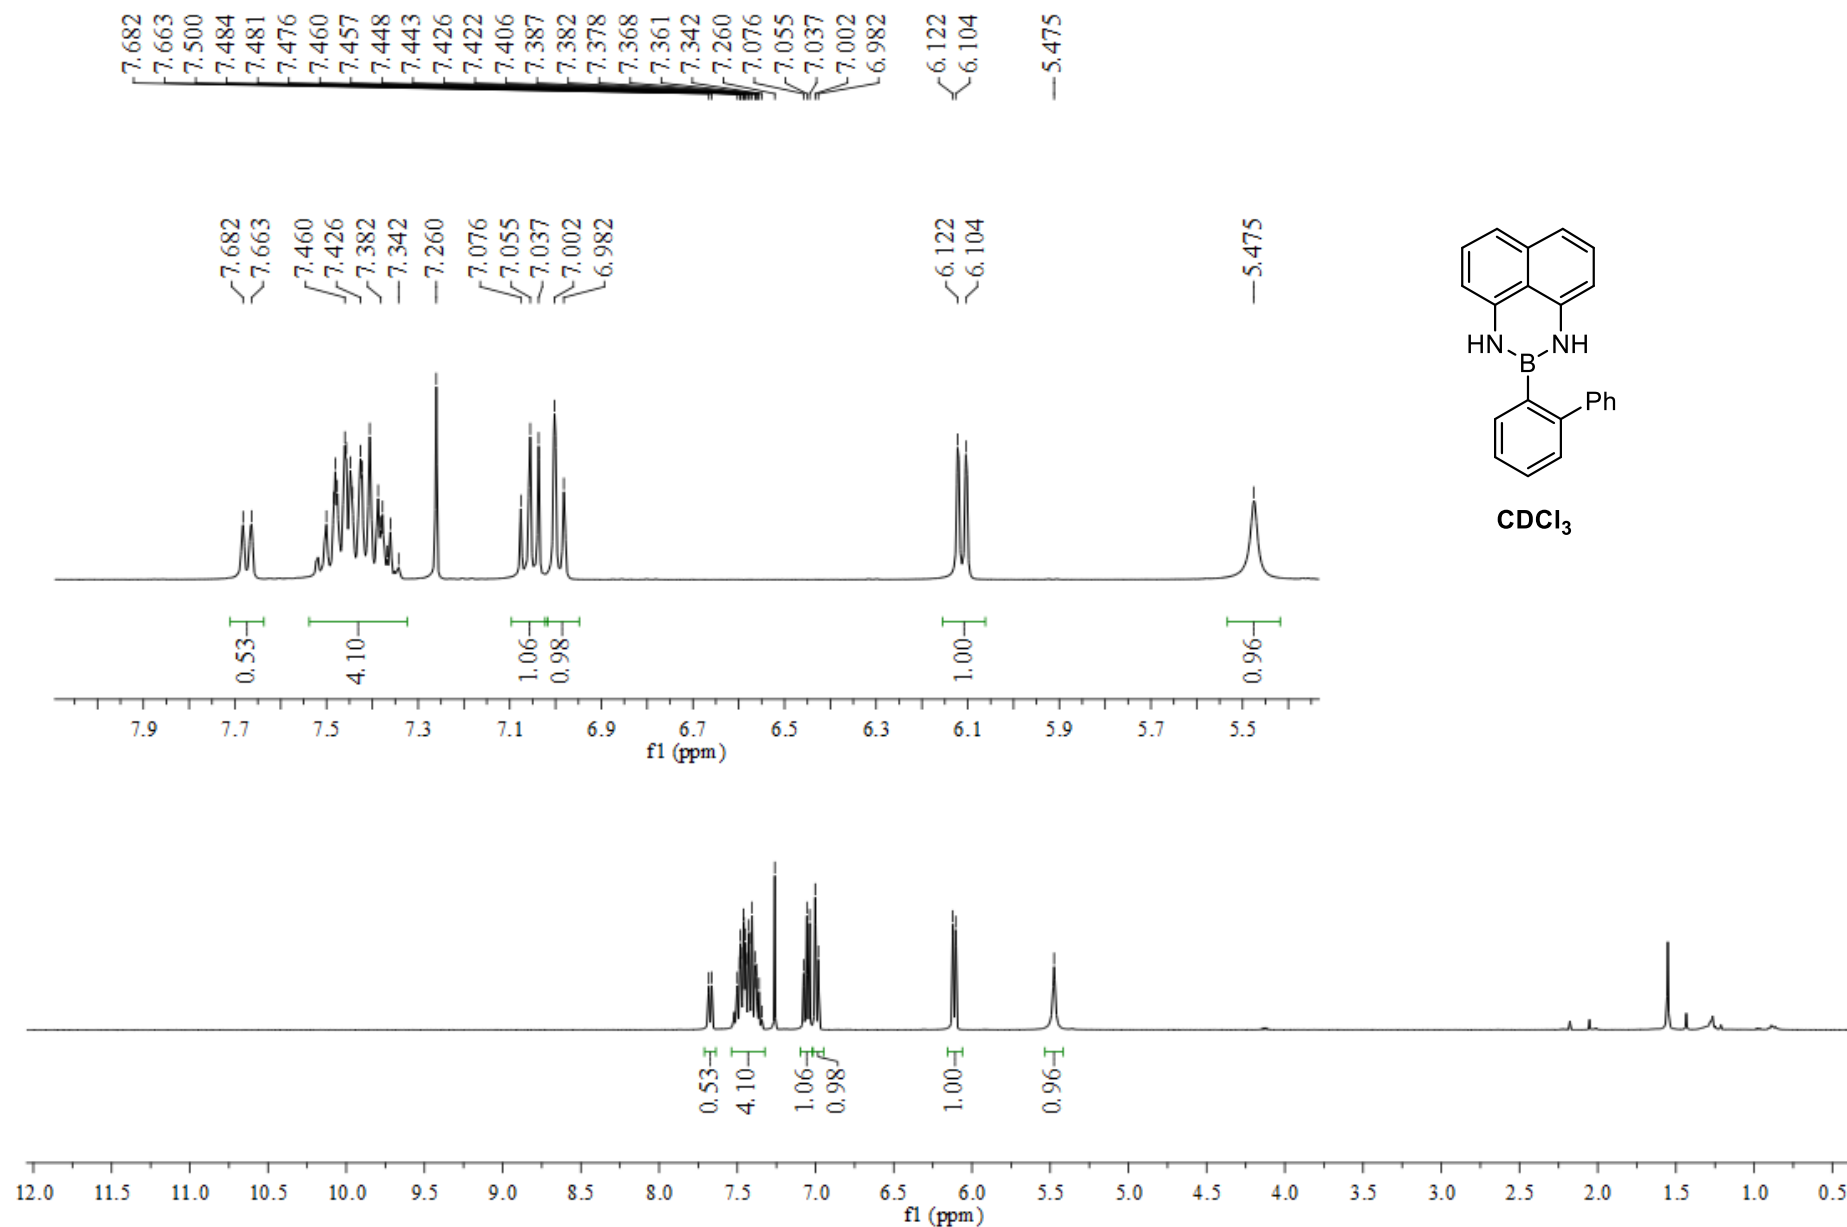

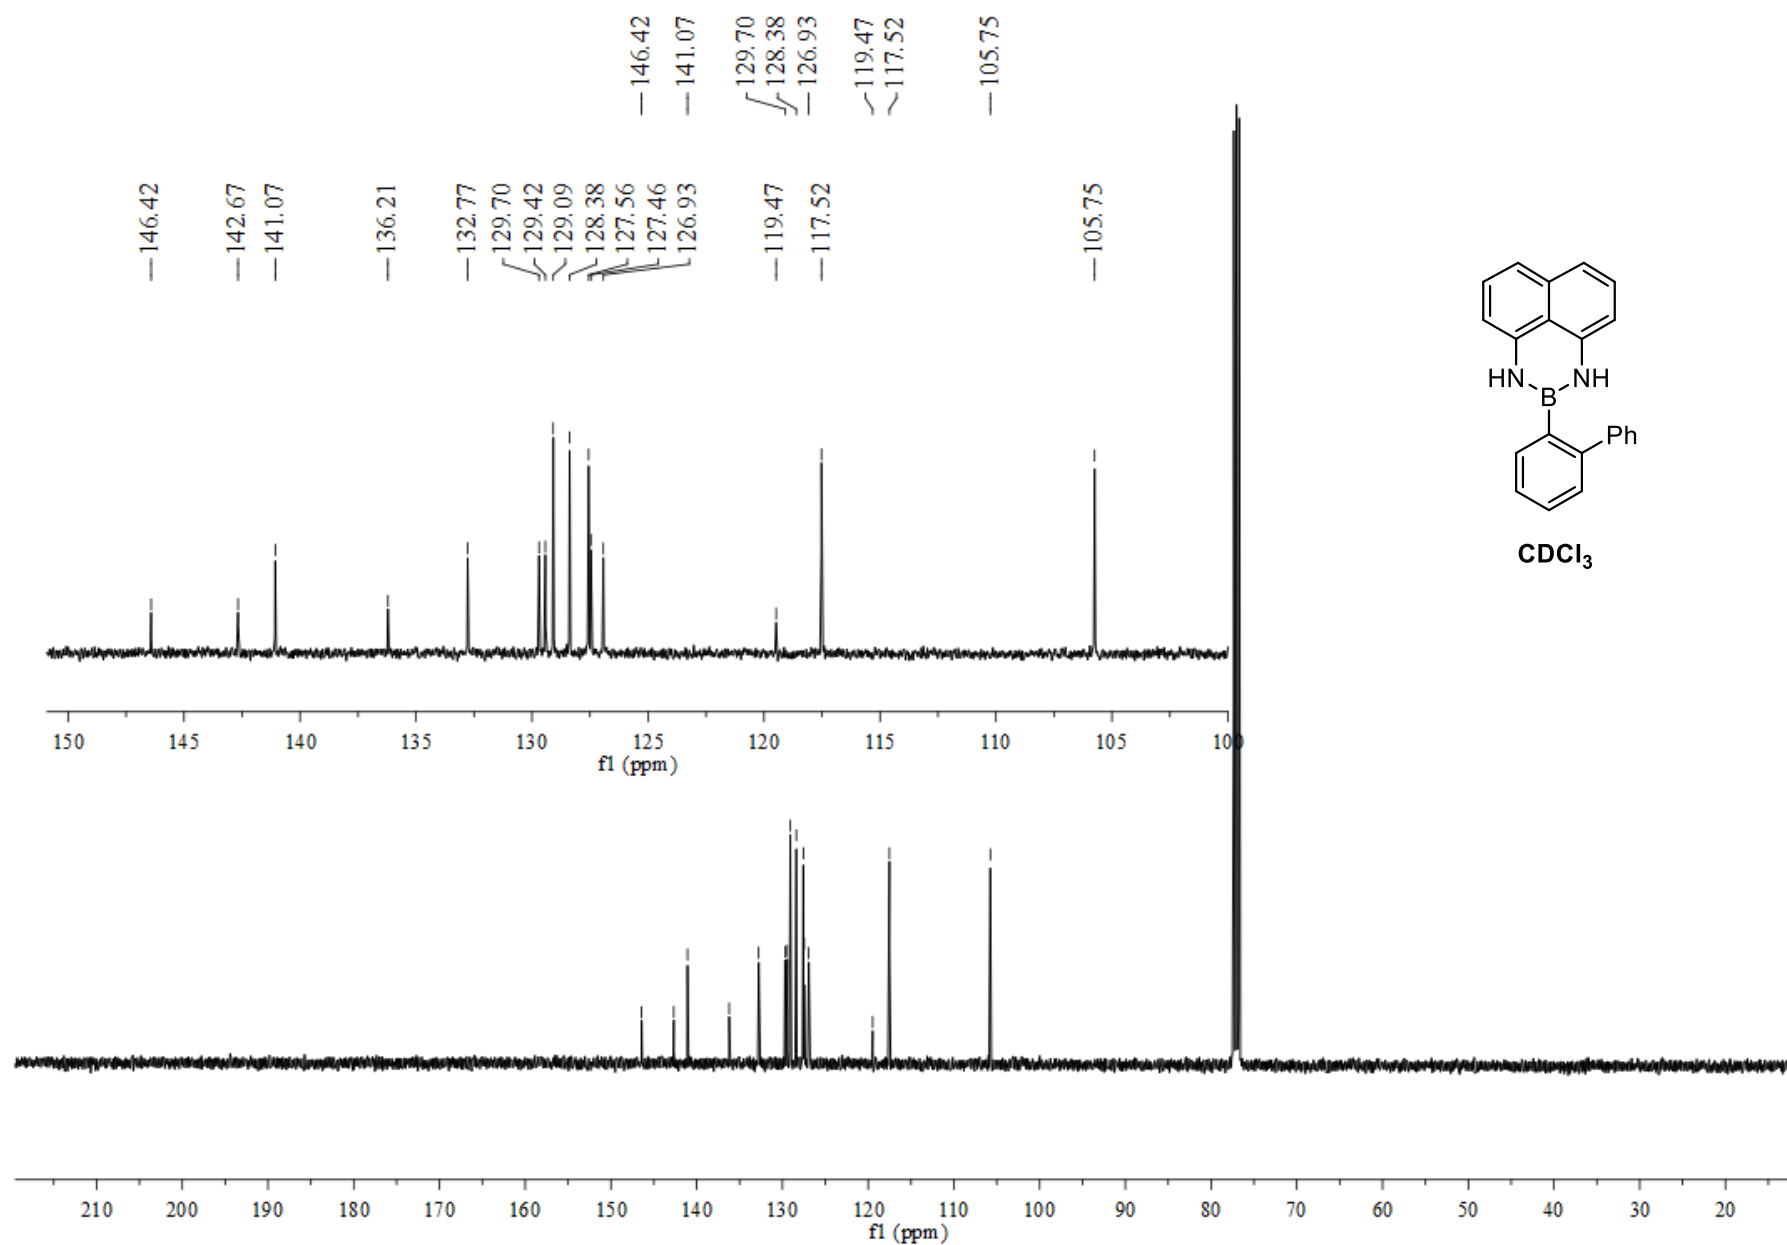

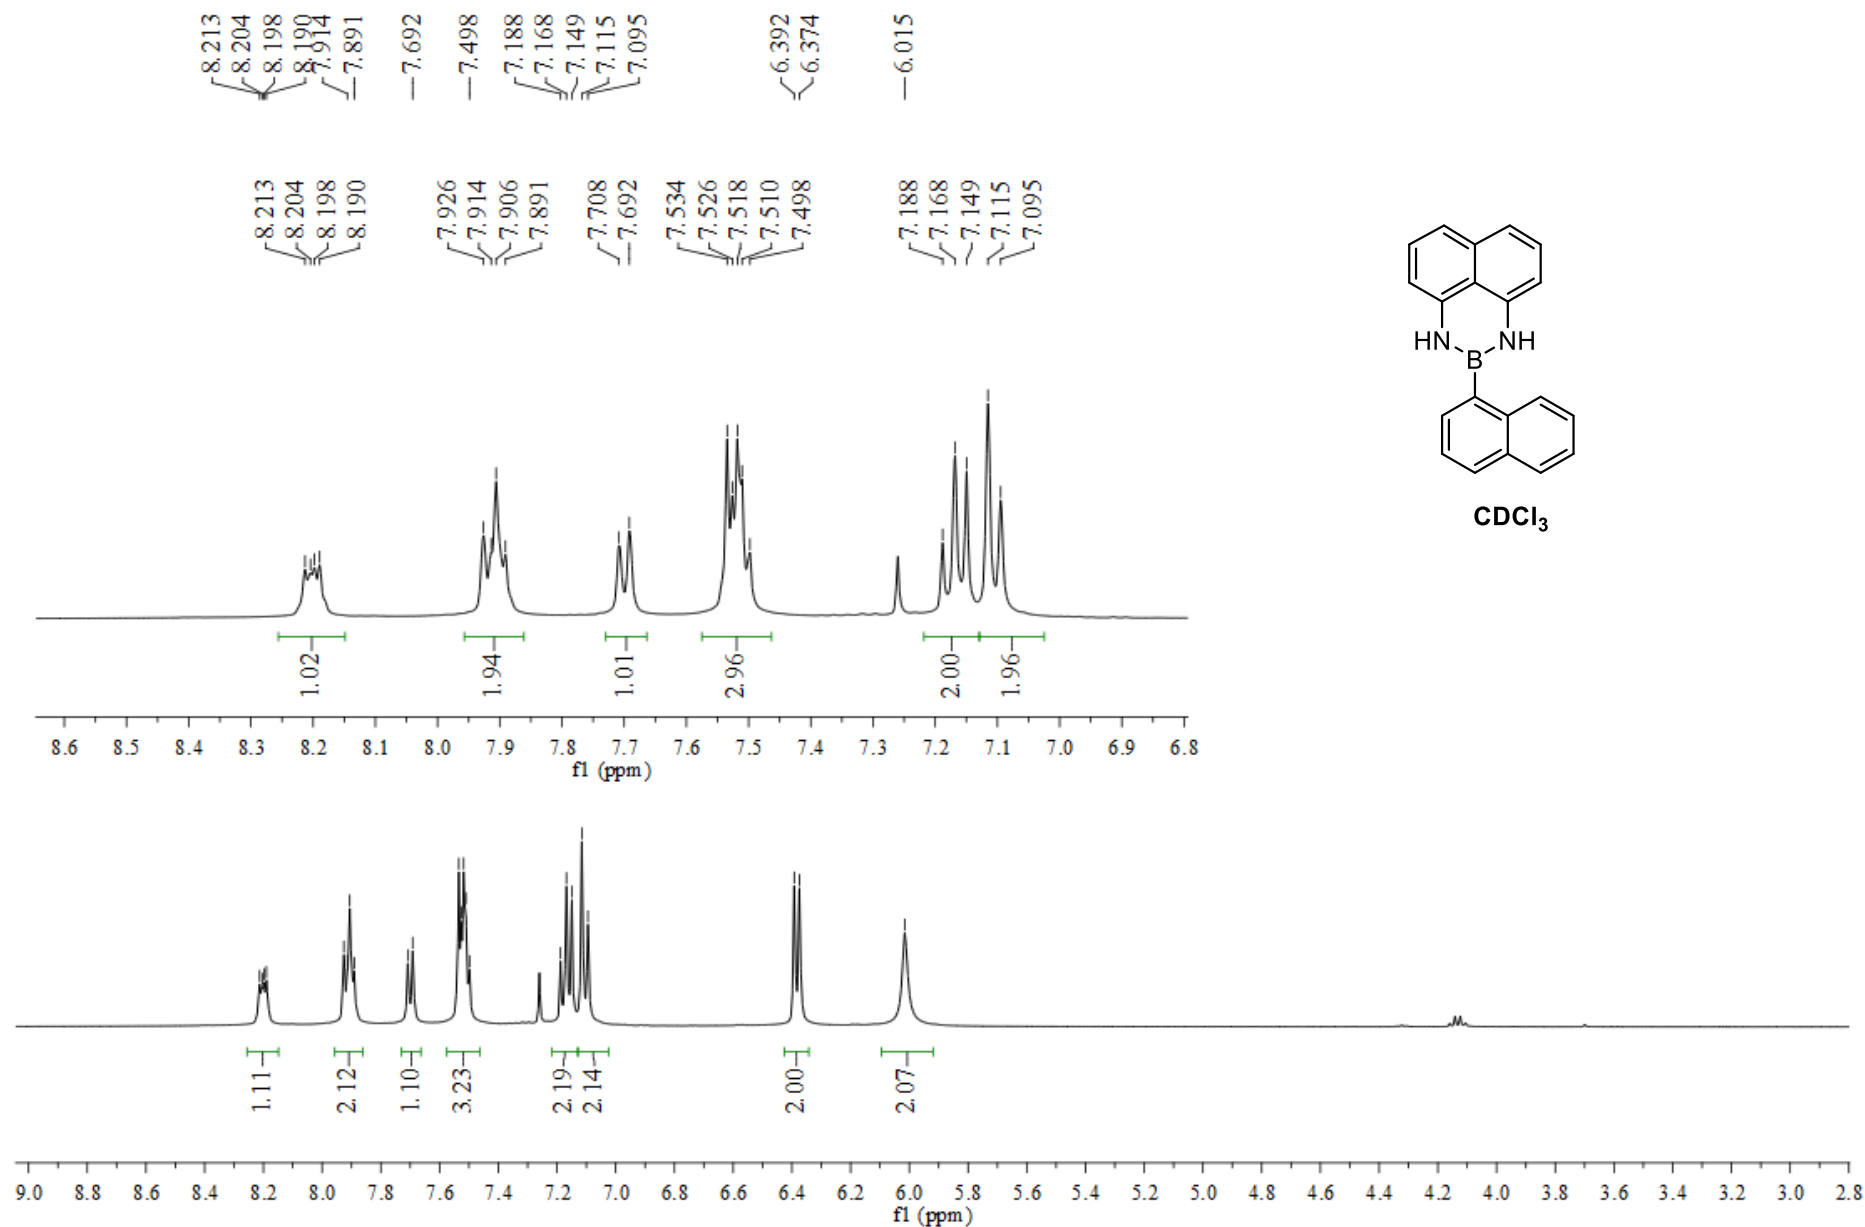

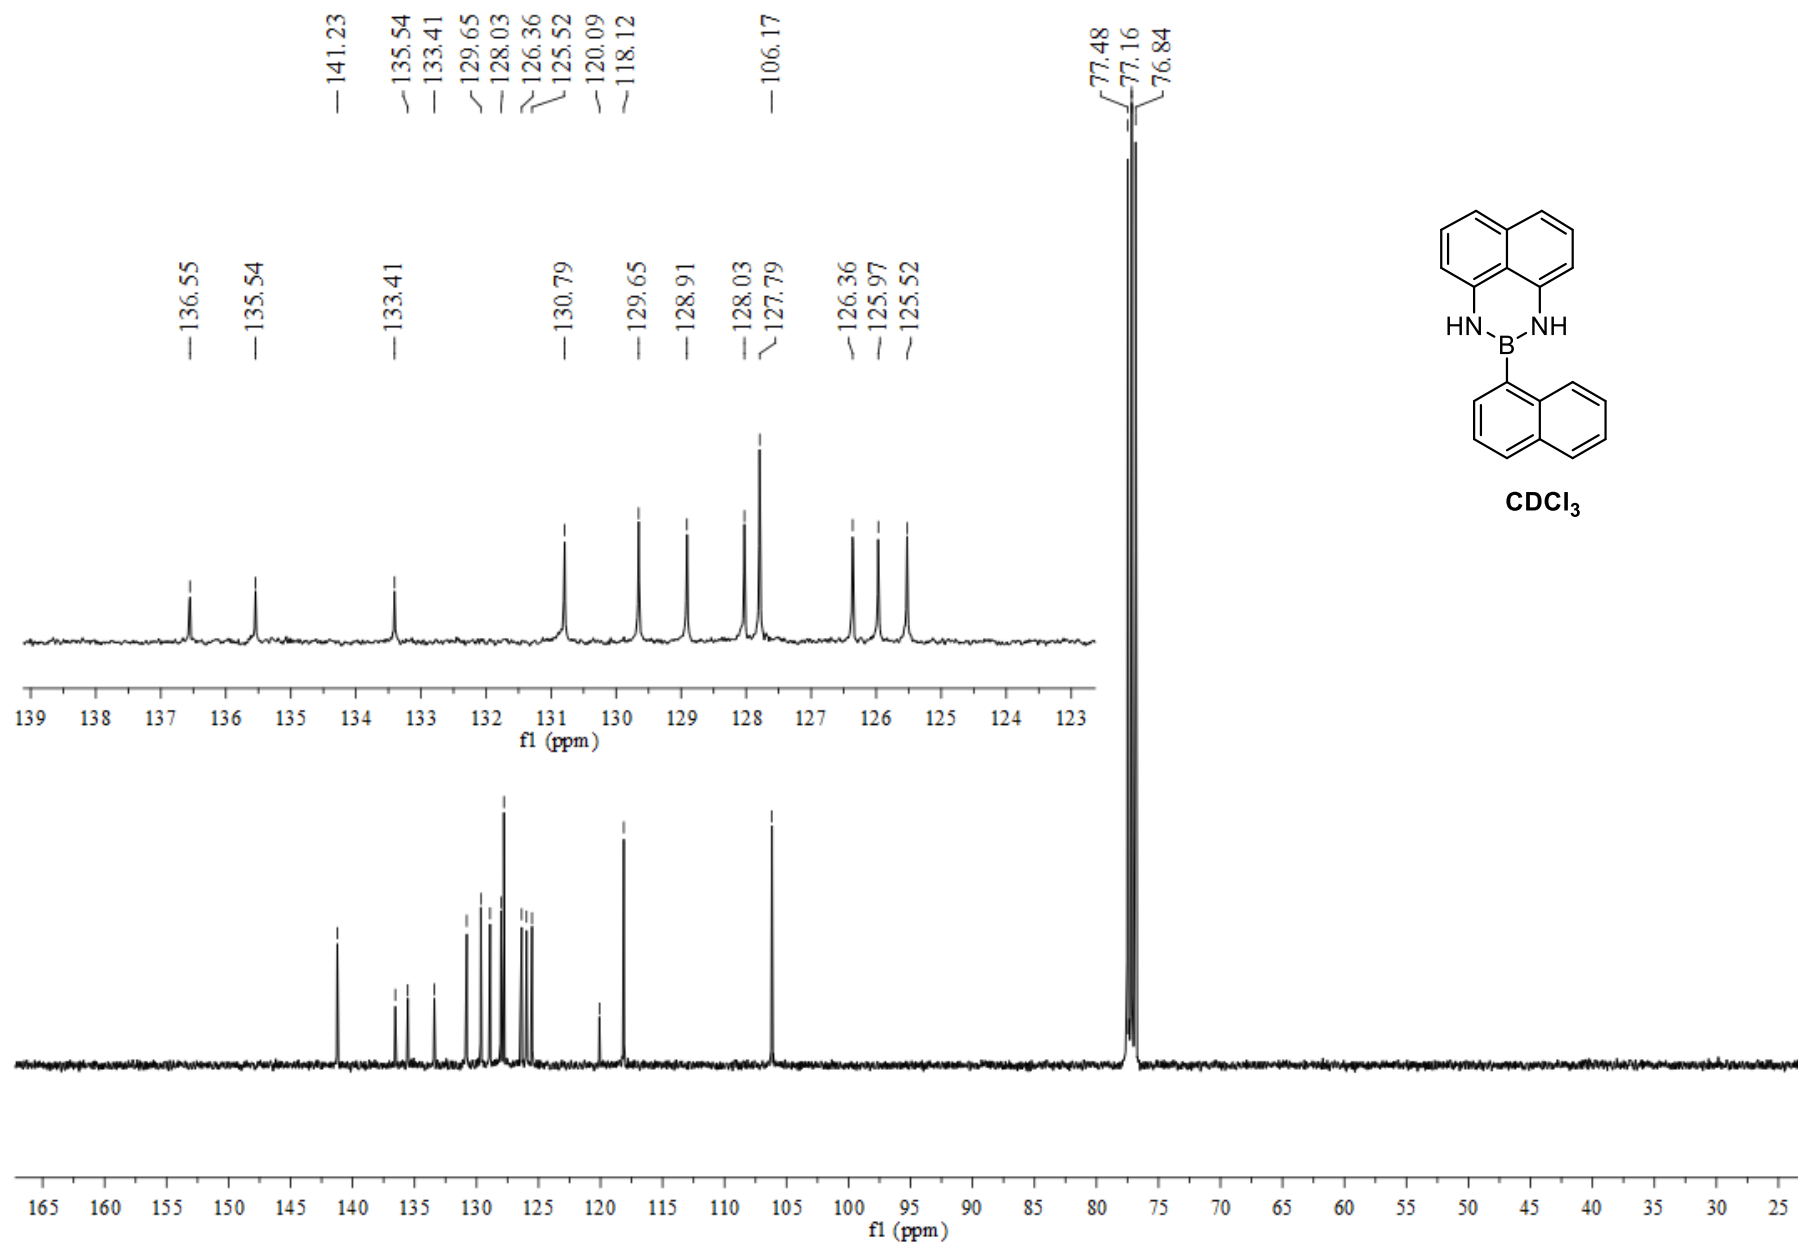



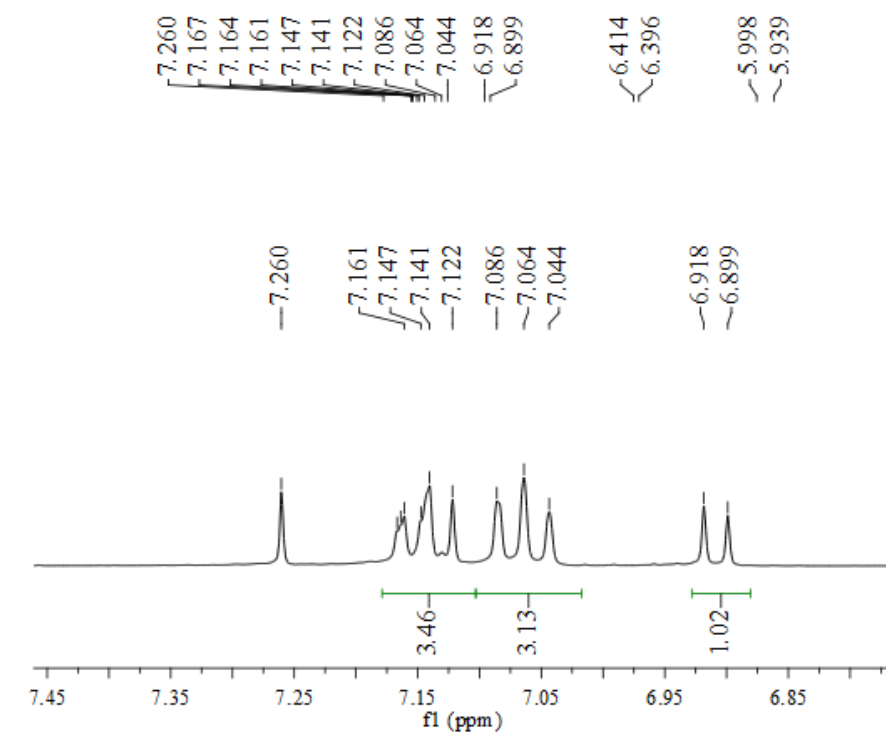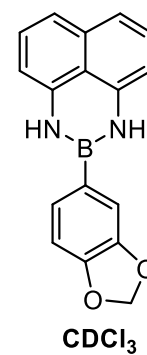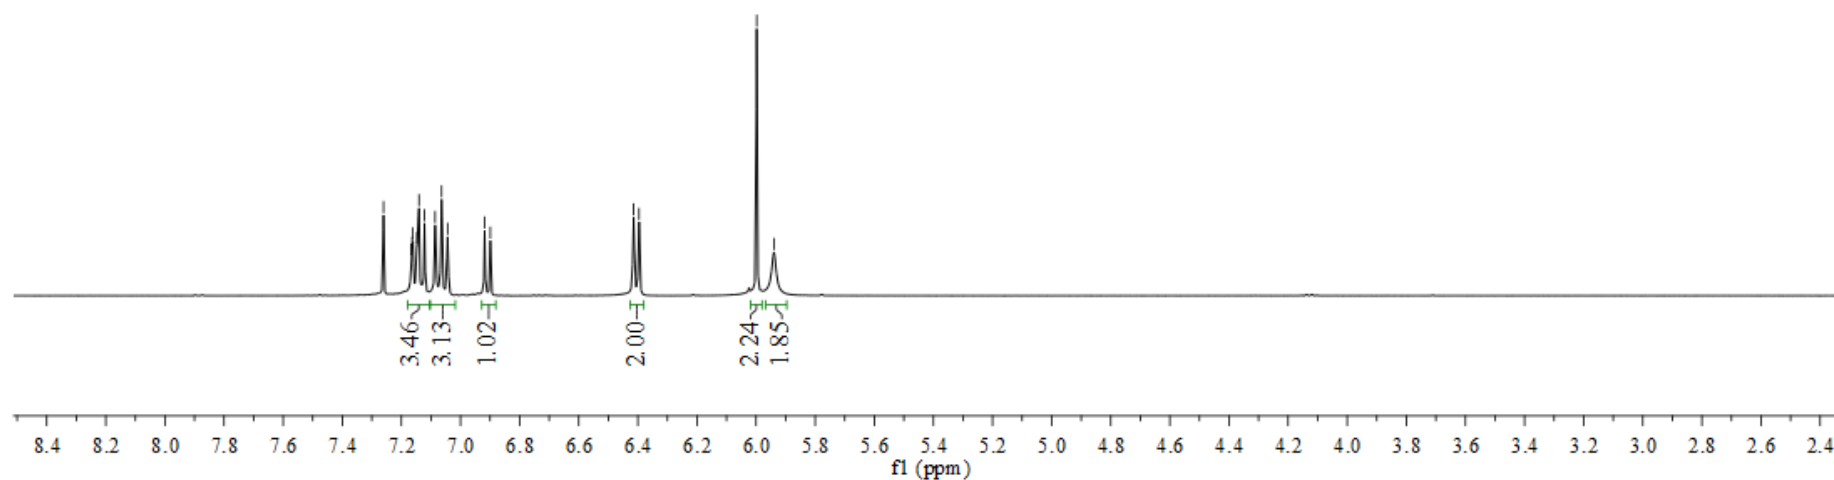

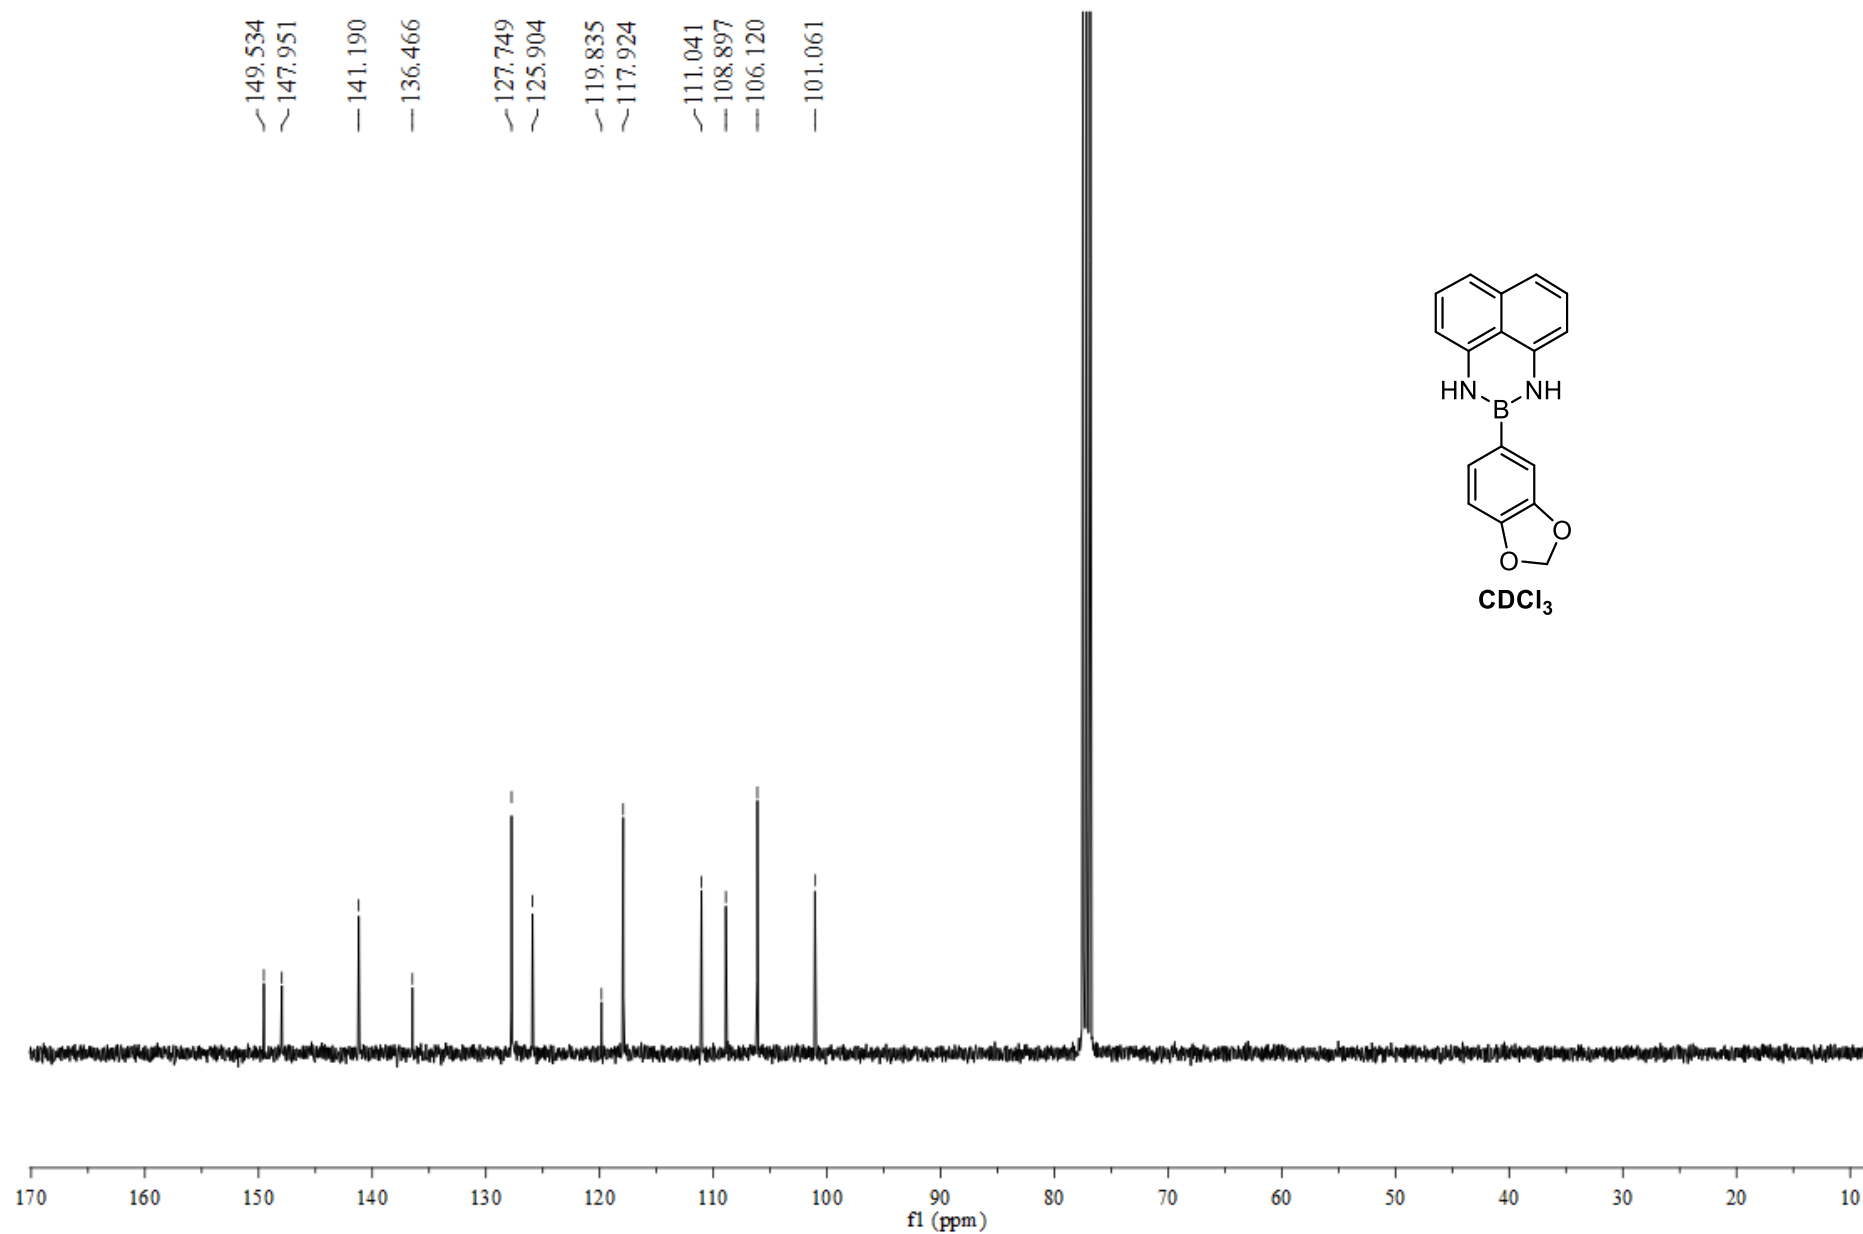

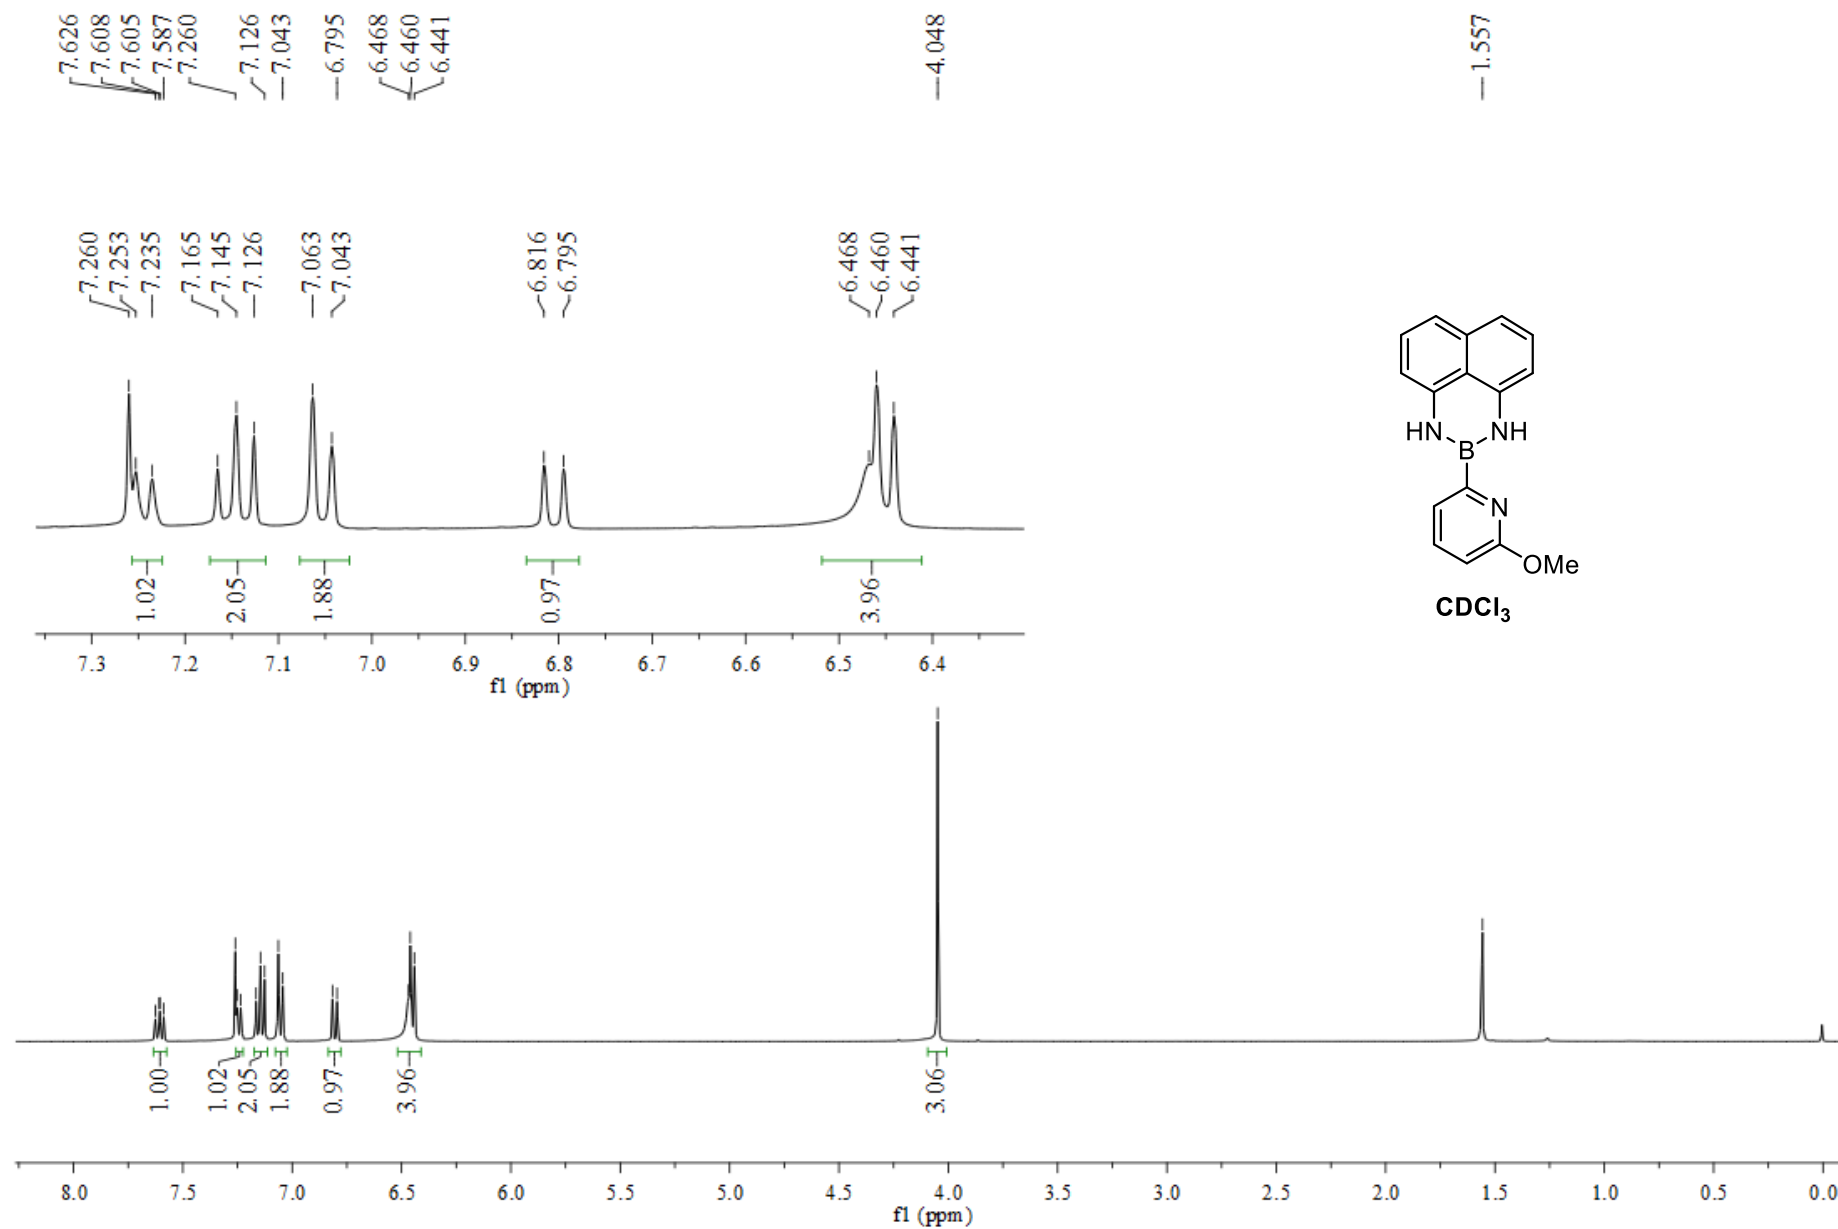

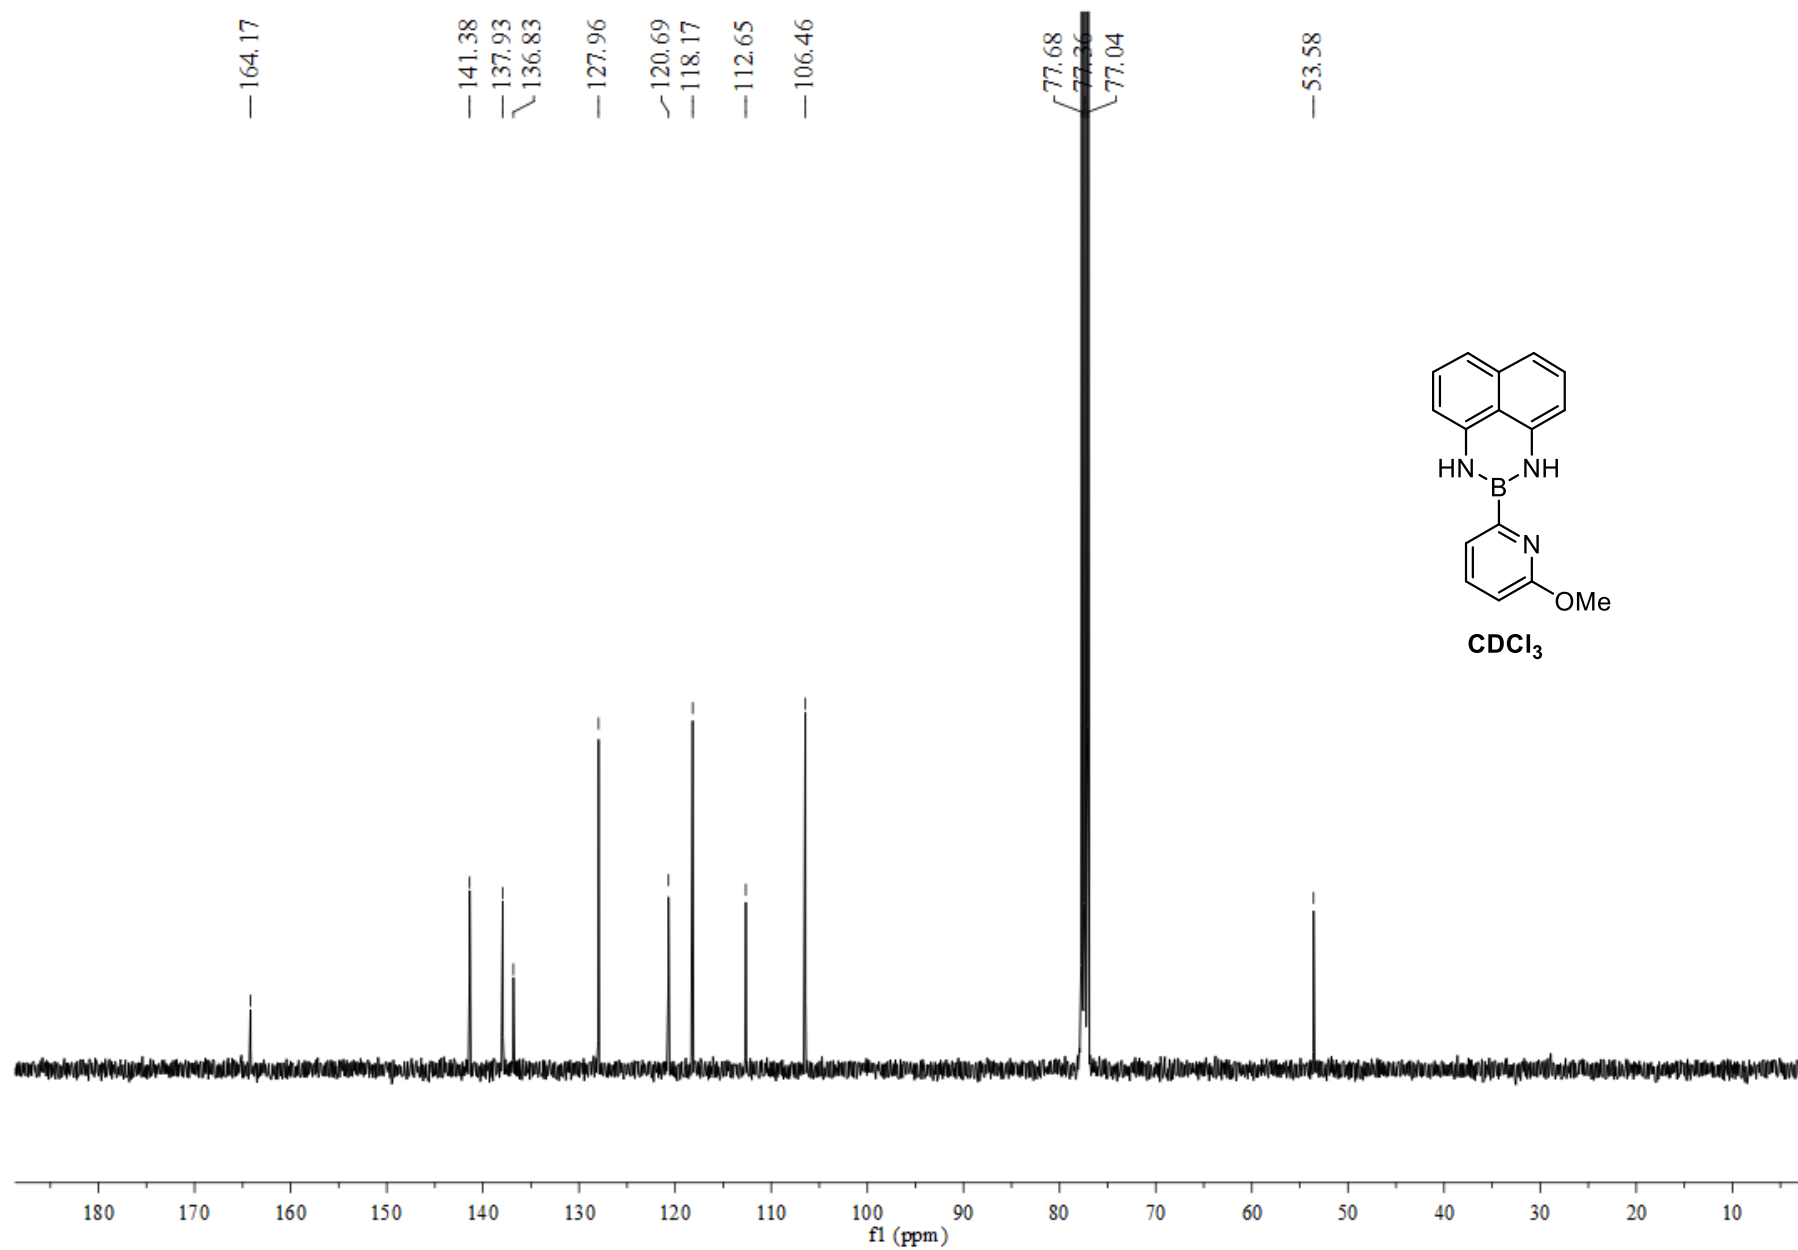

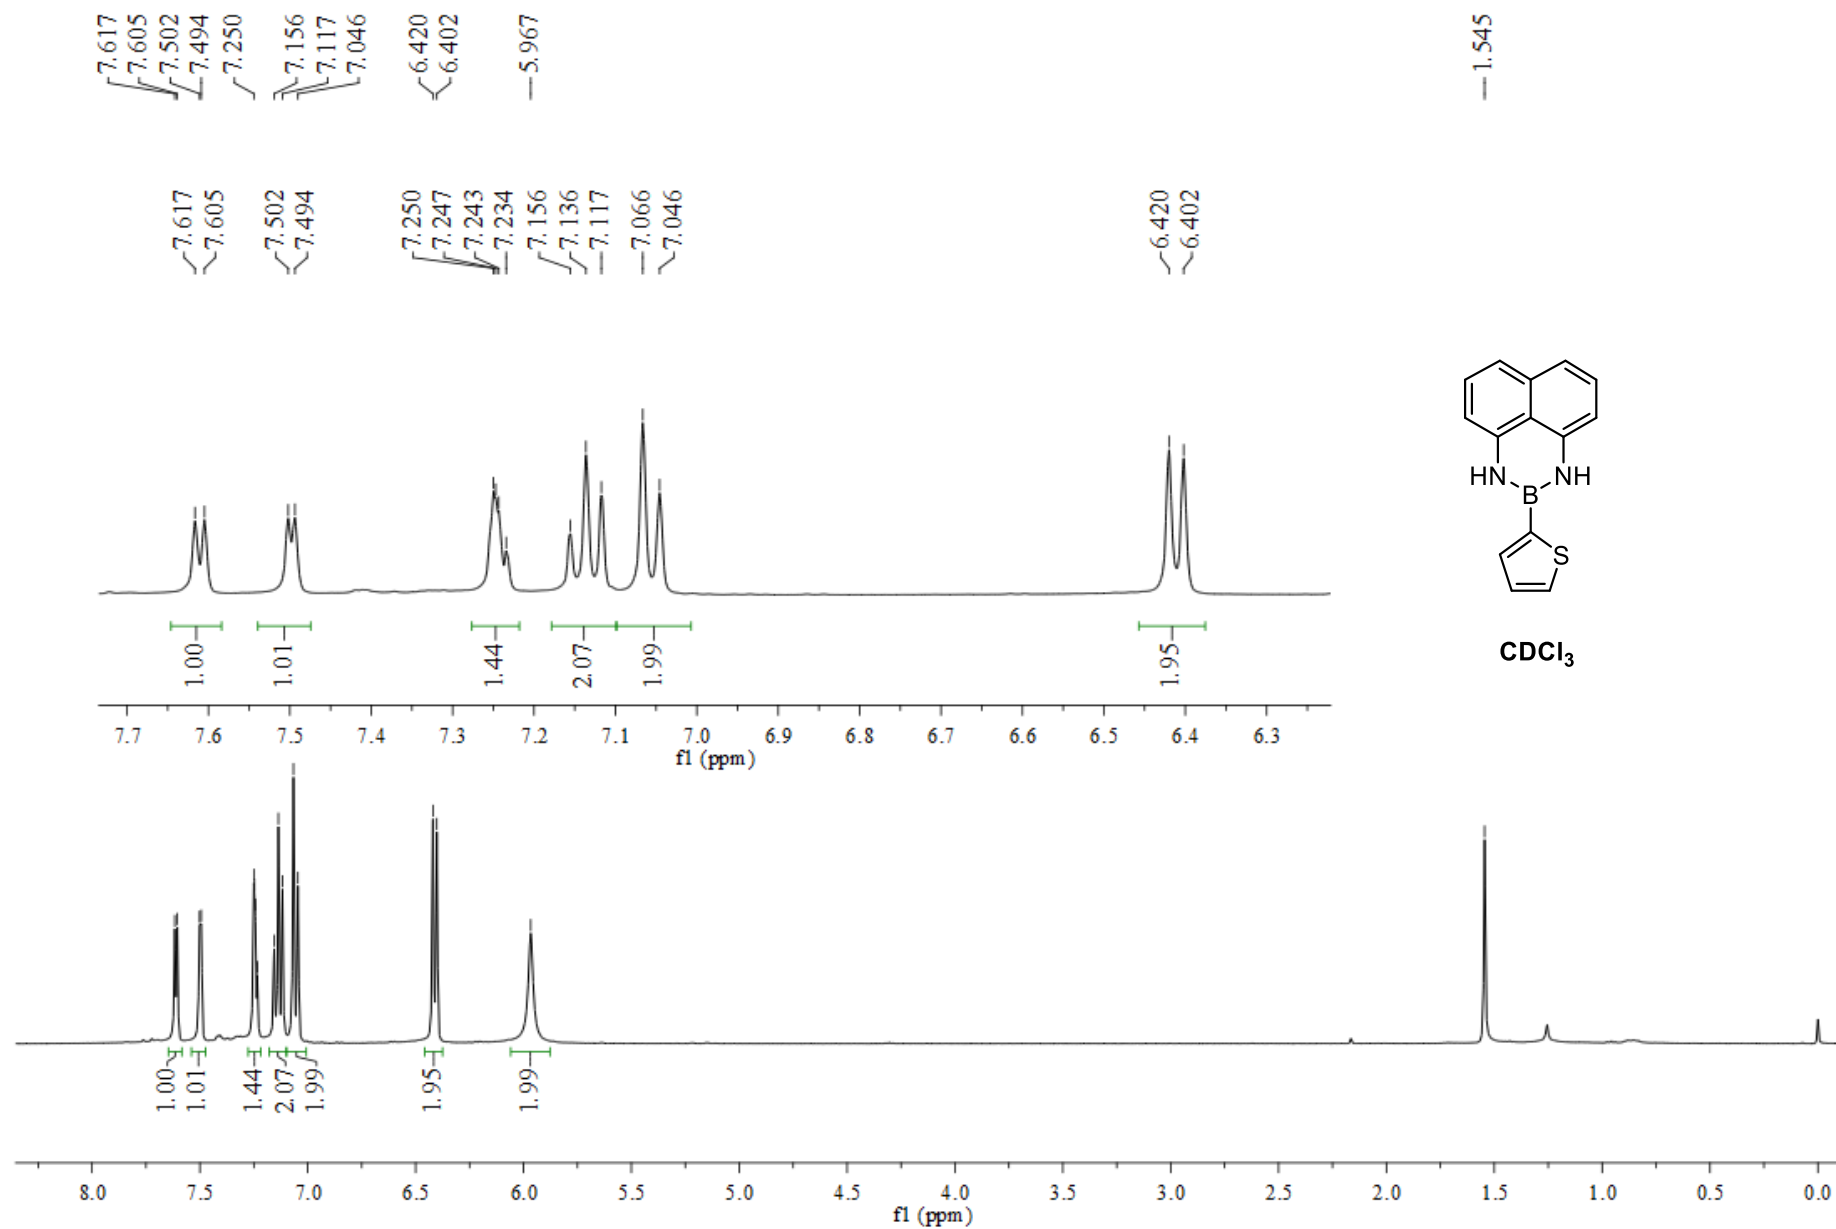

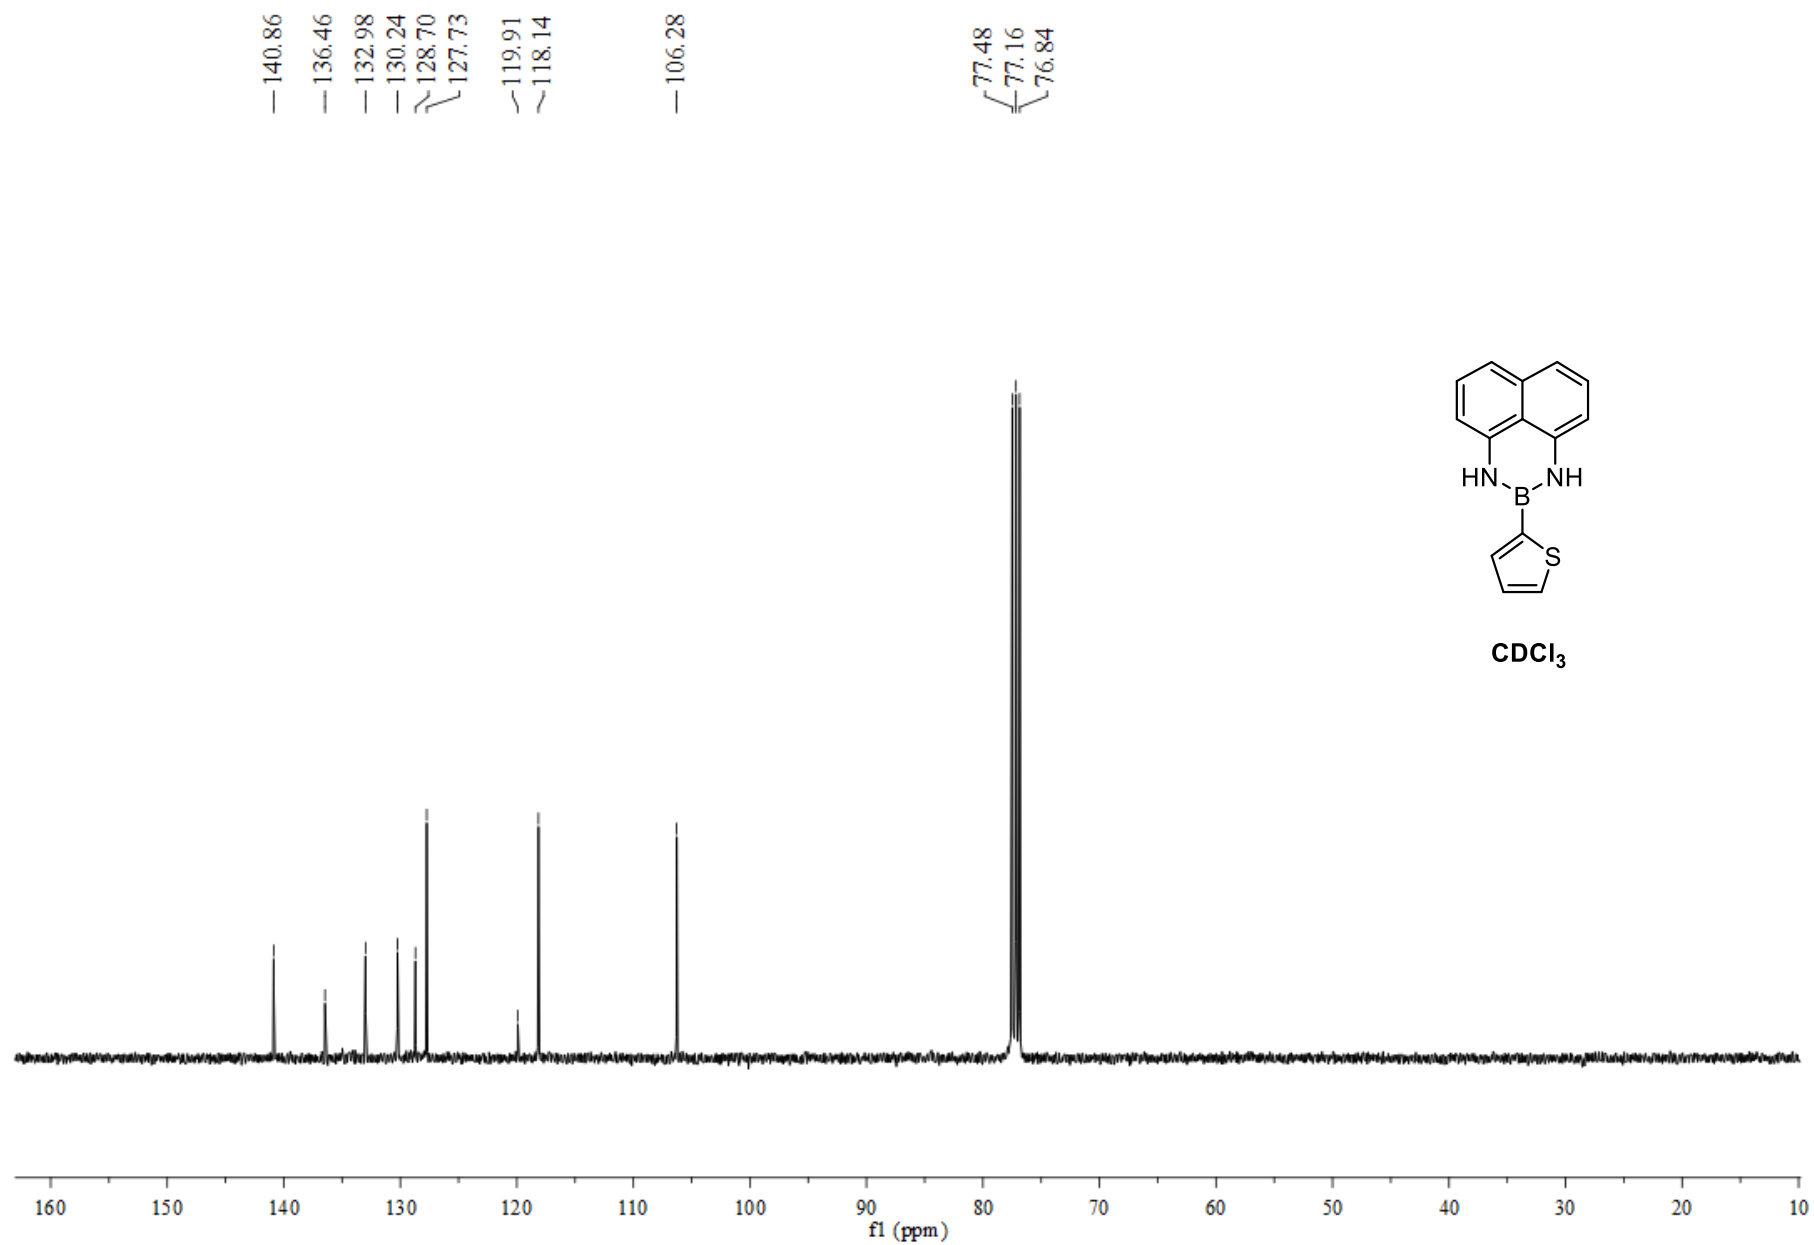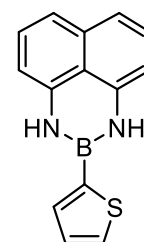

CDCl<sub>3</sub>

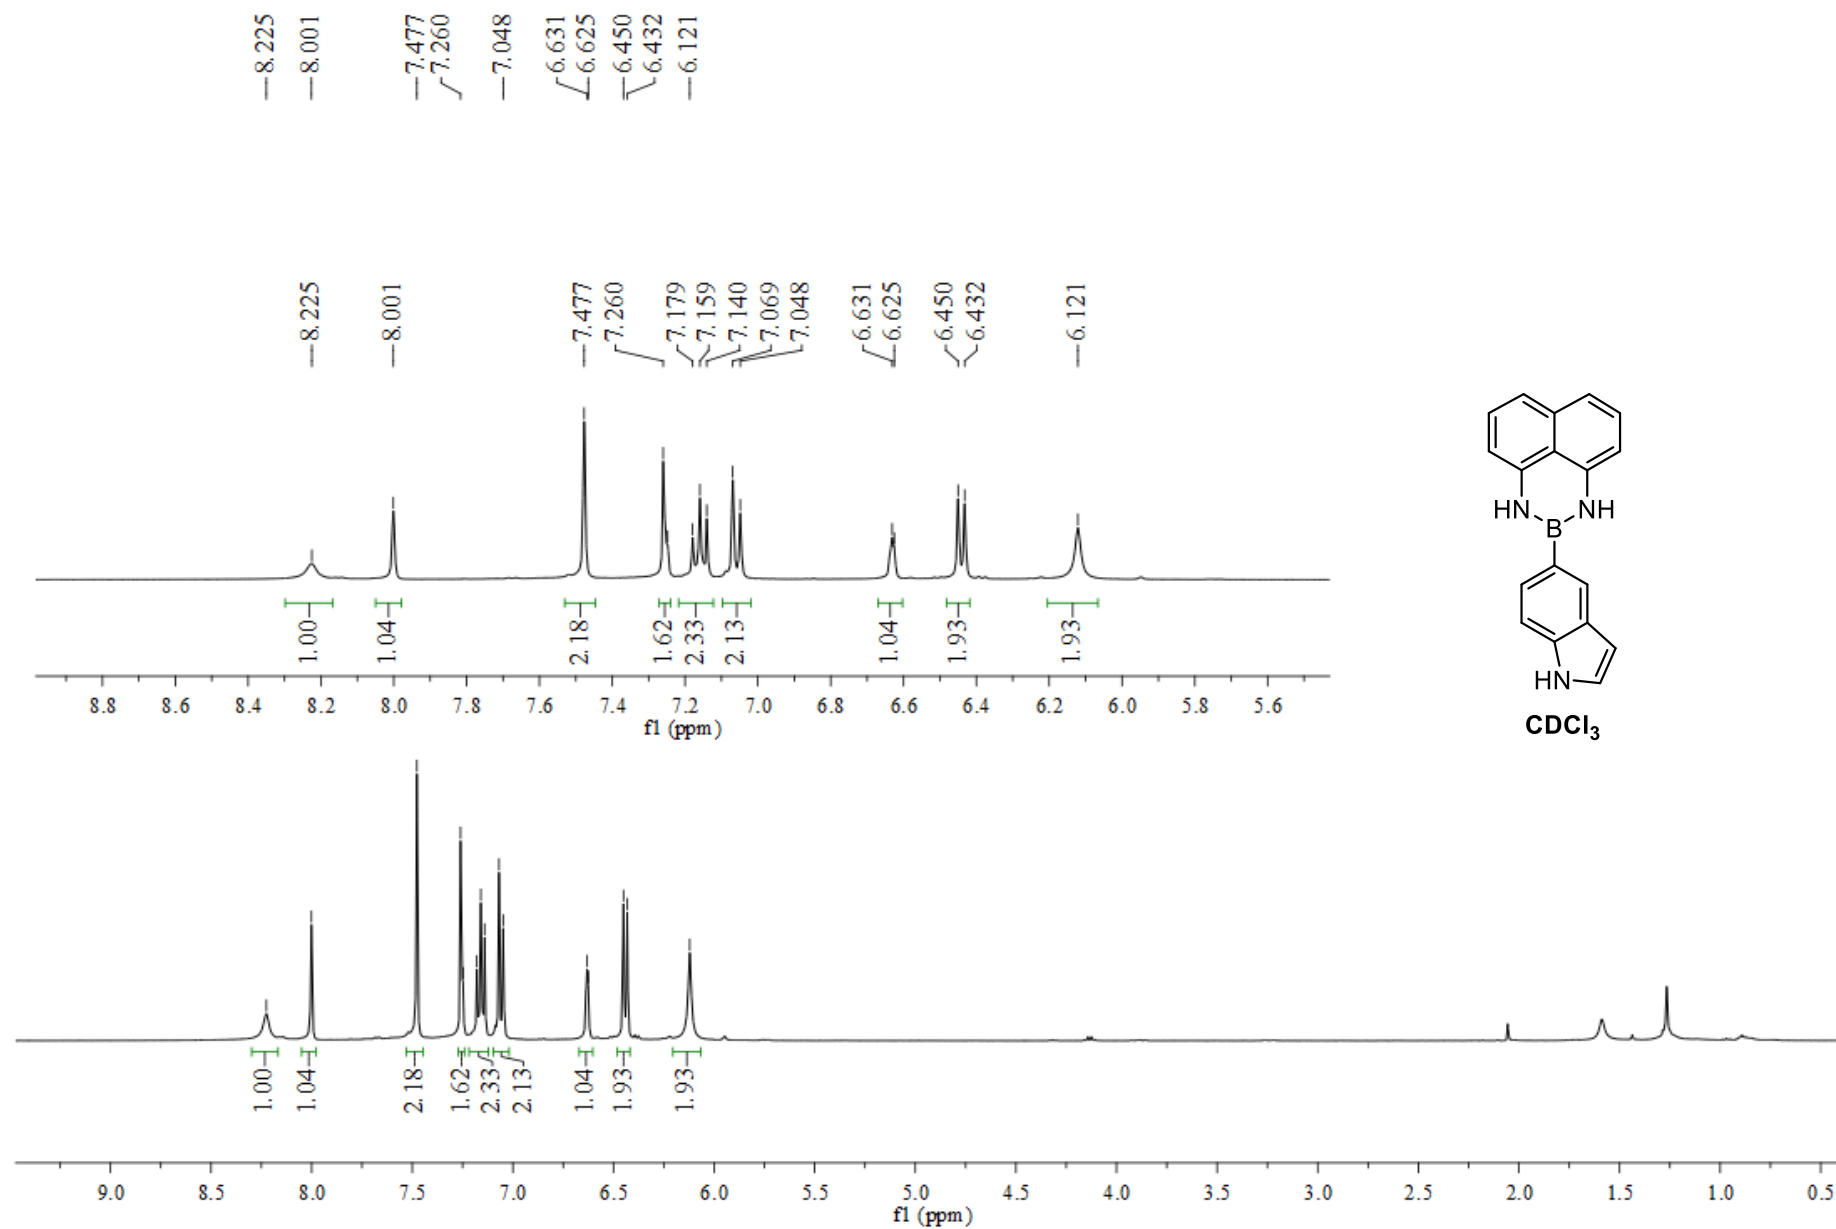

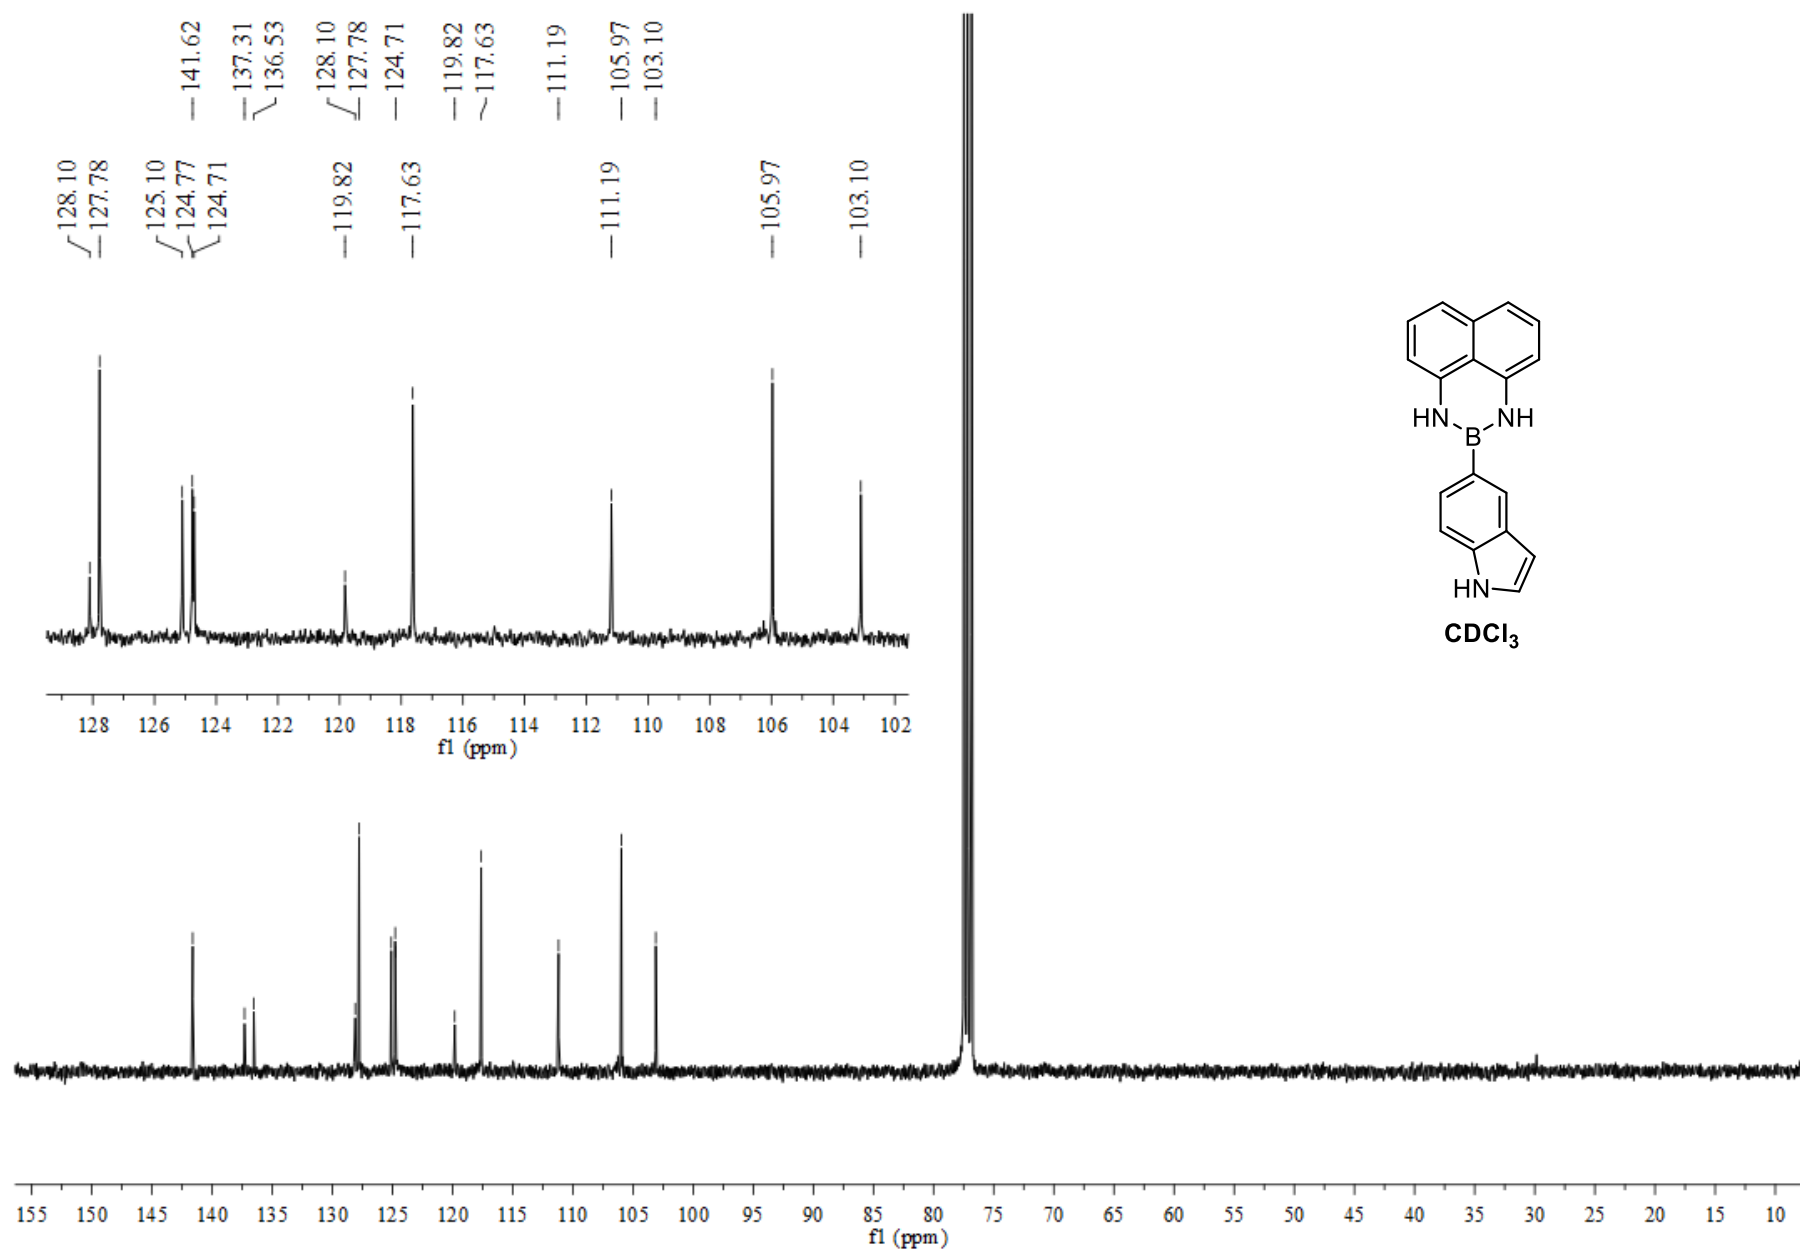



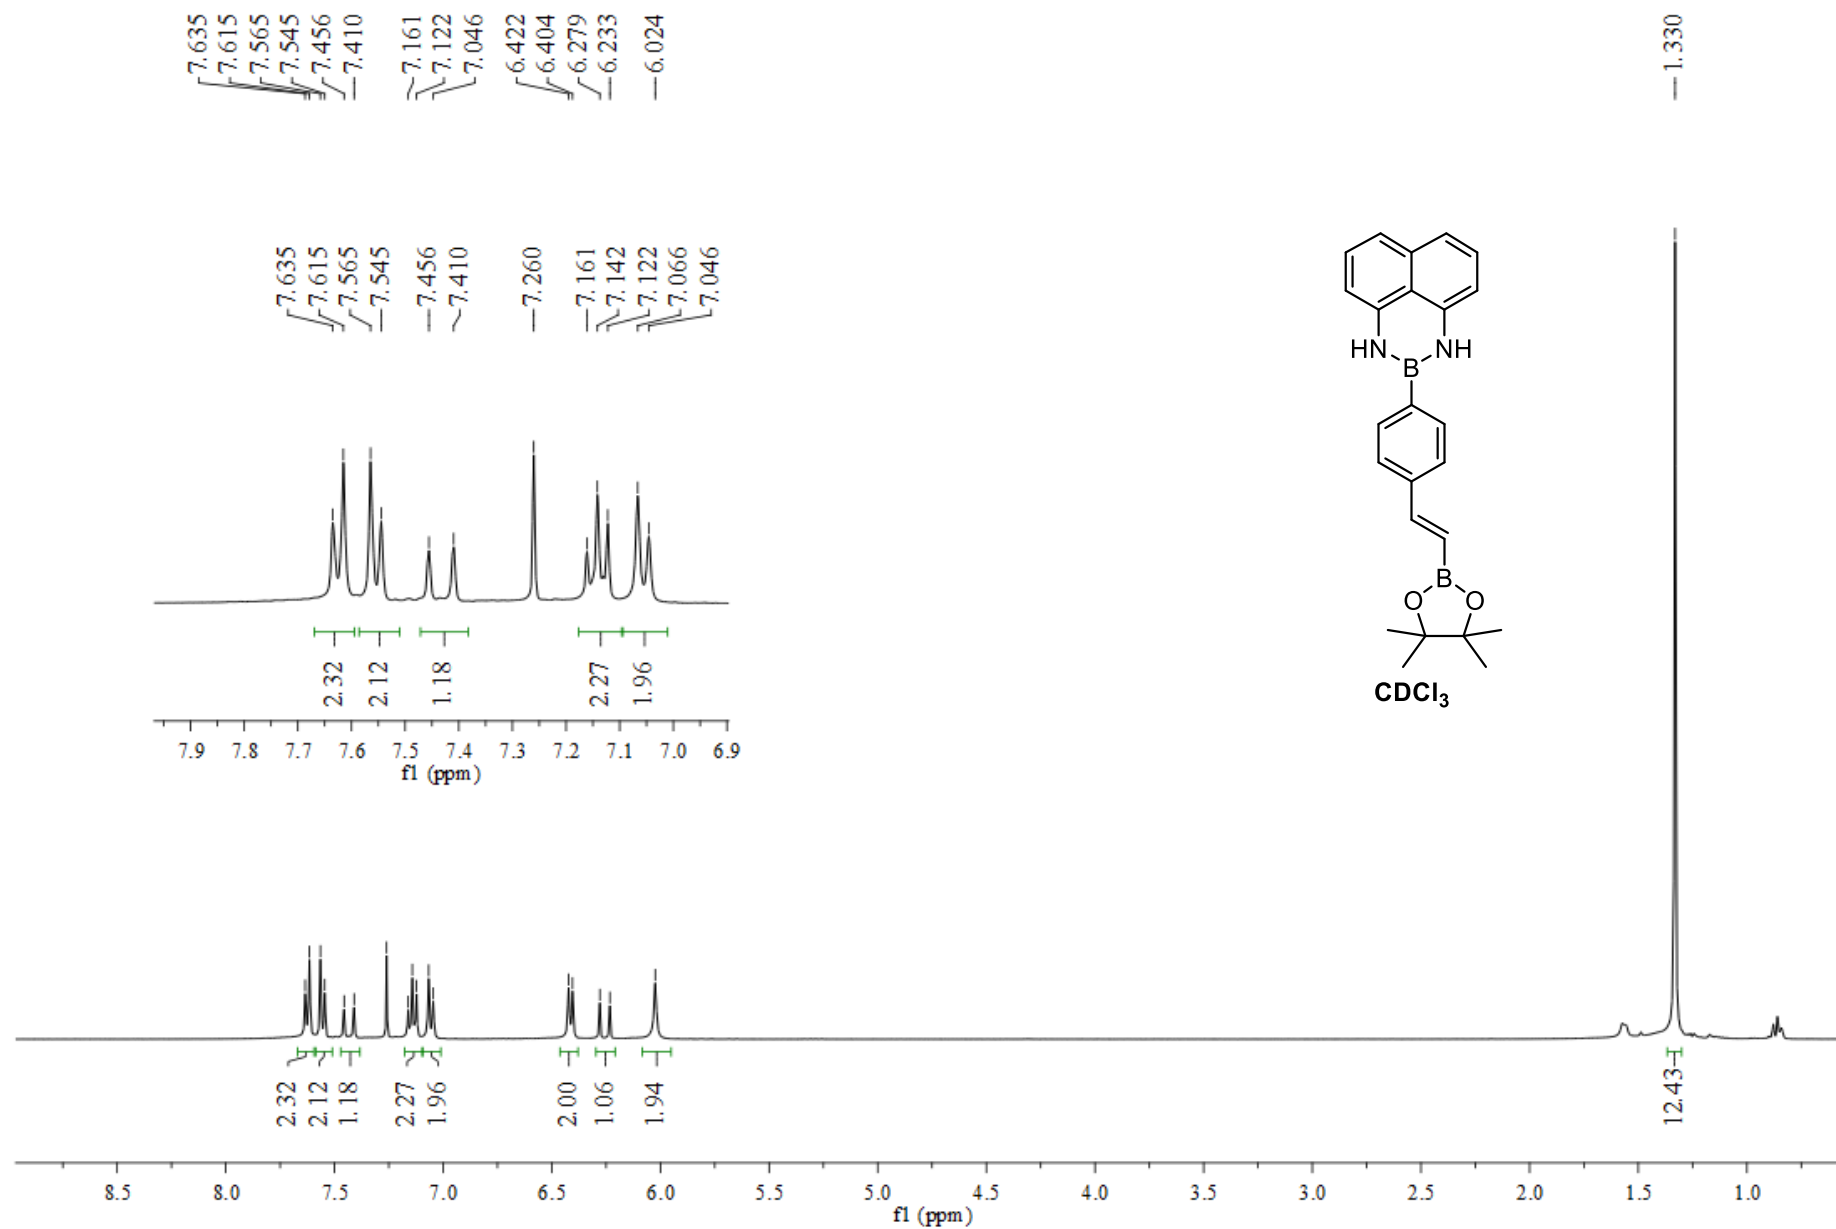

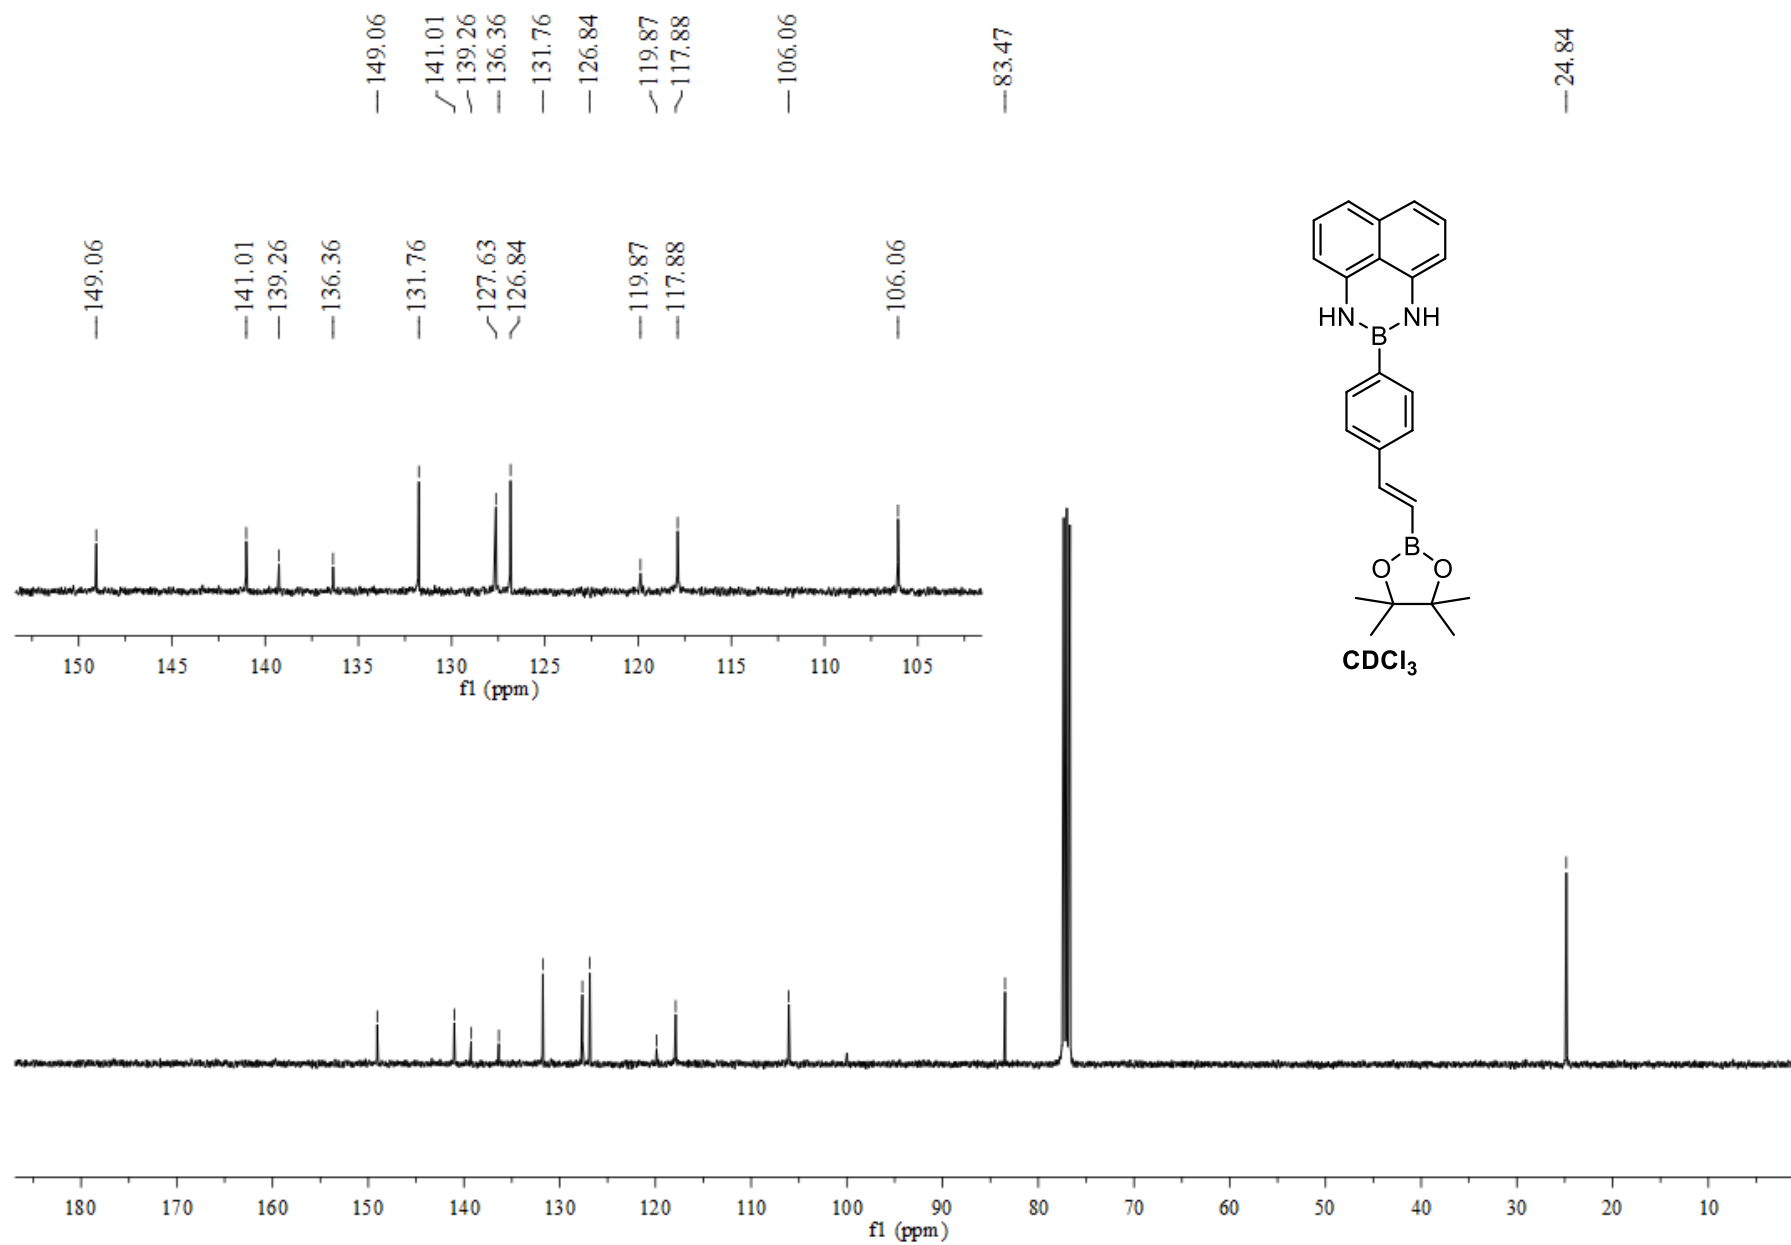

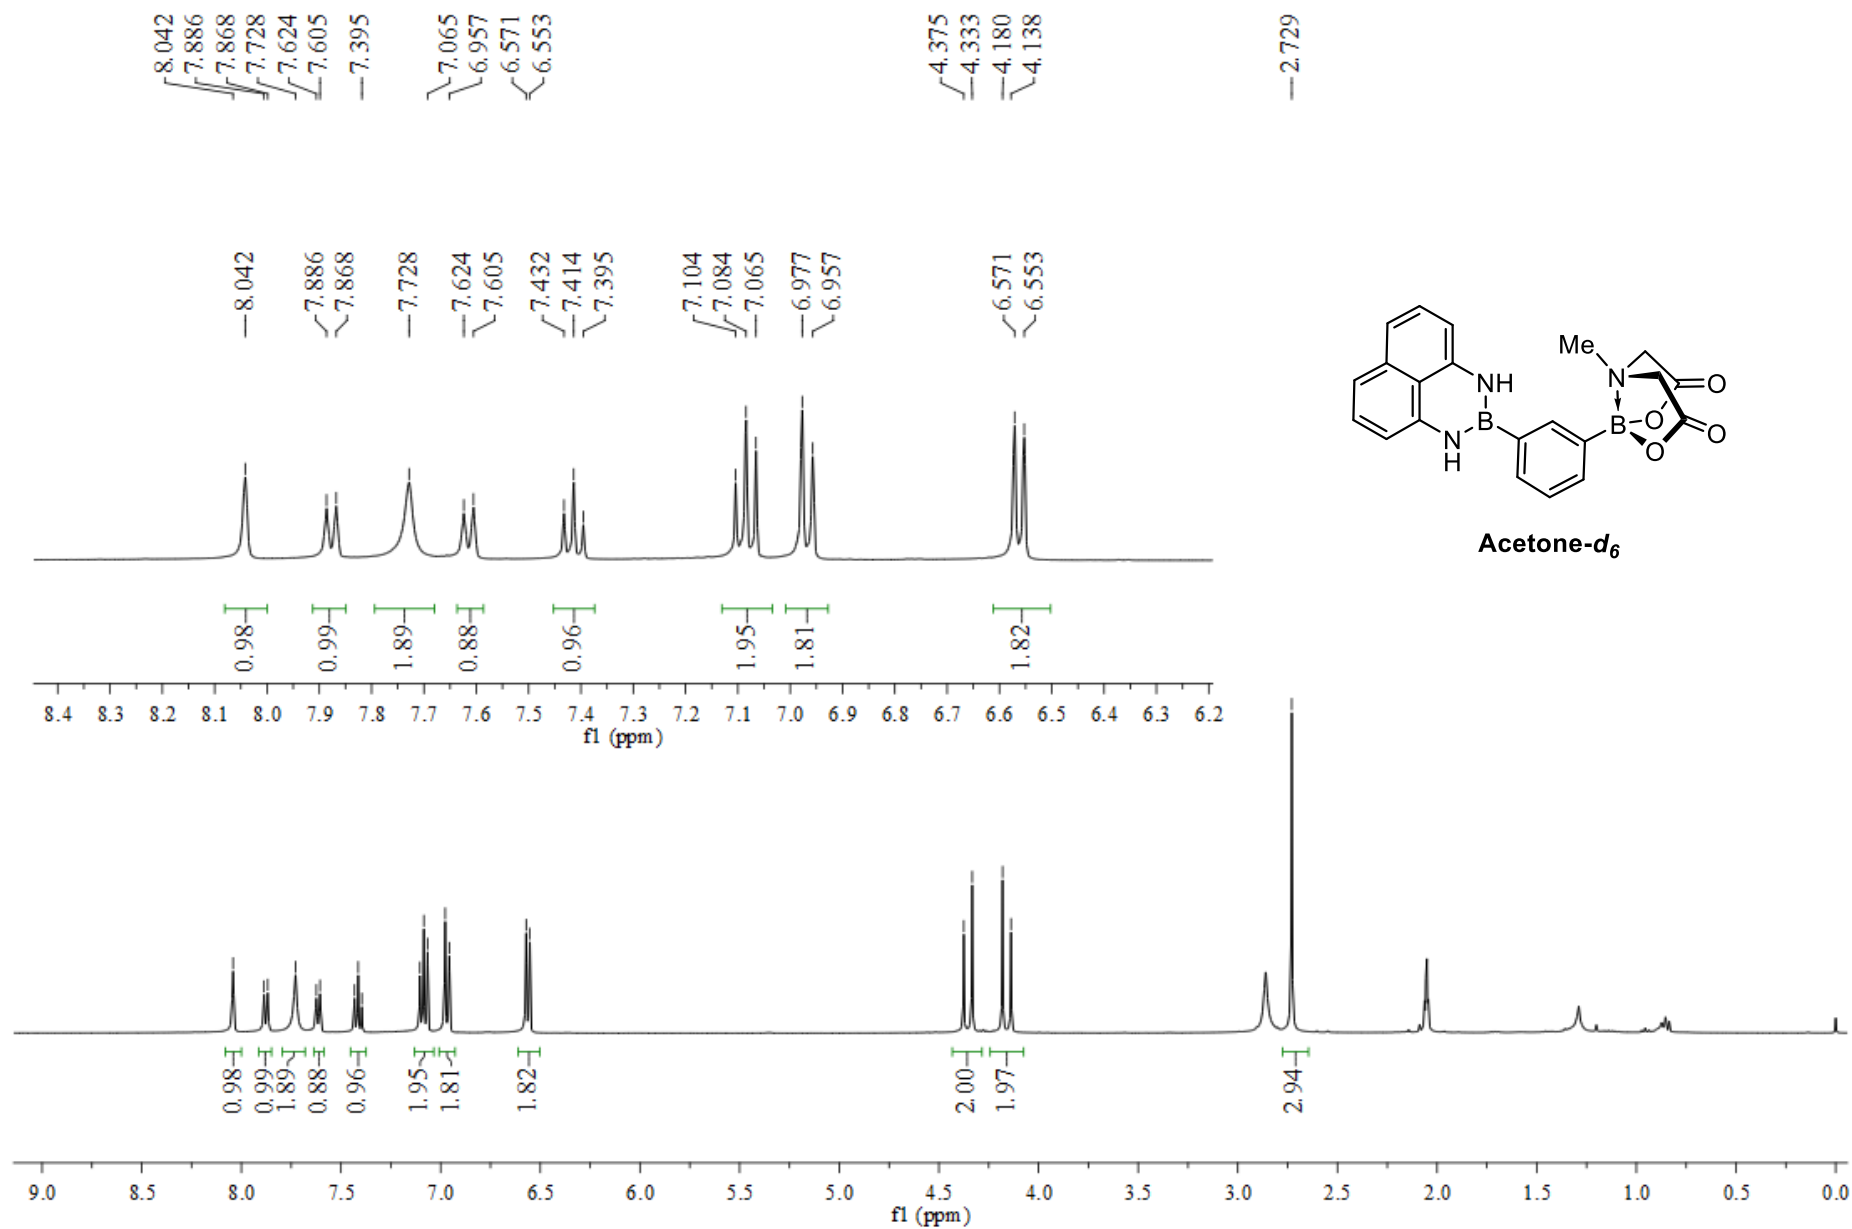

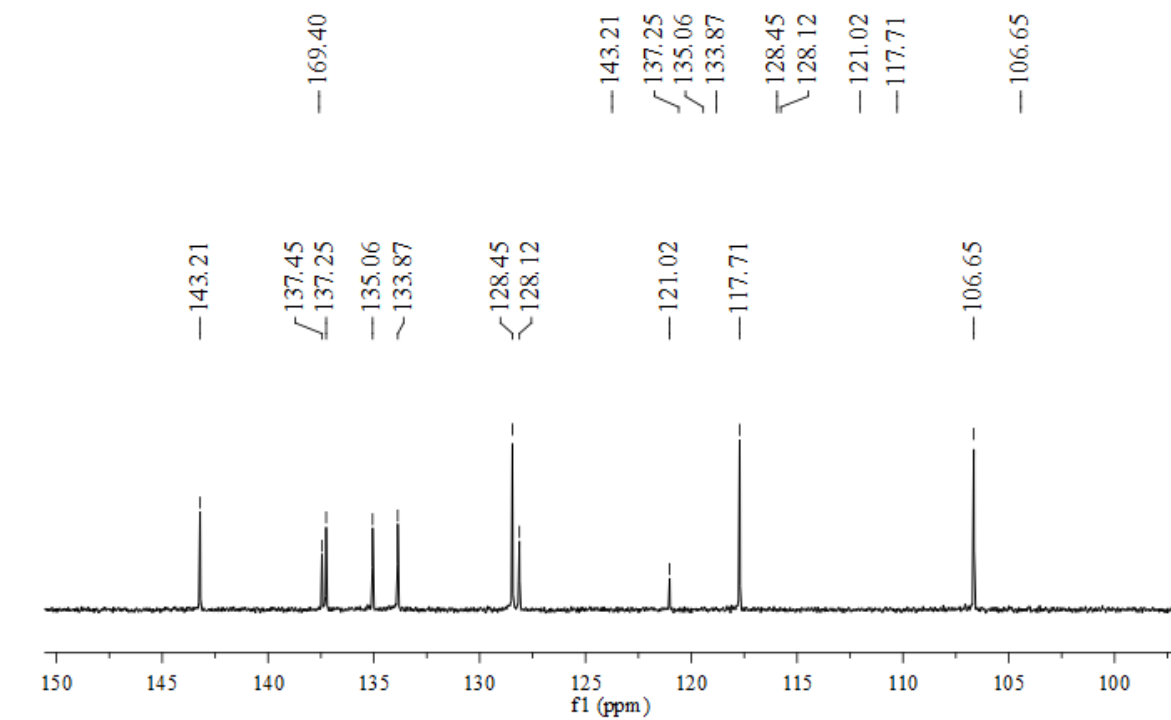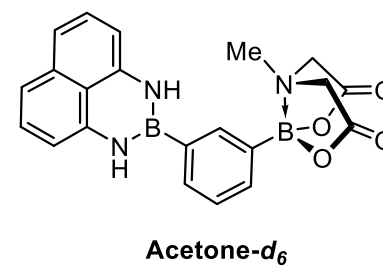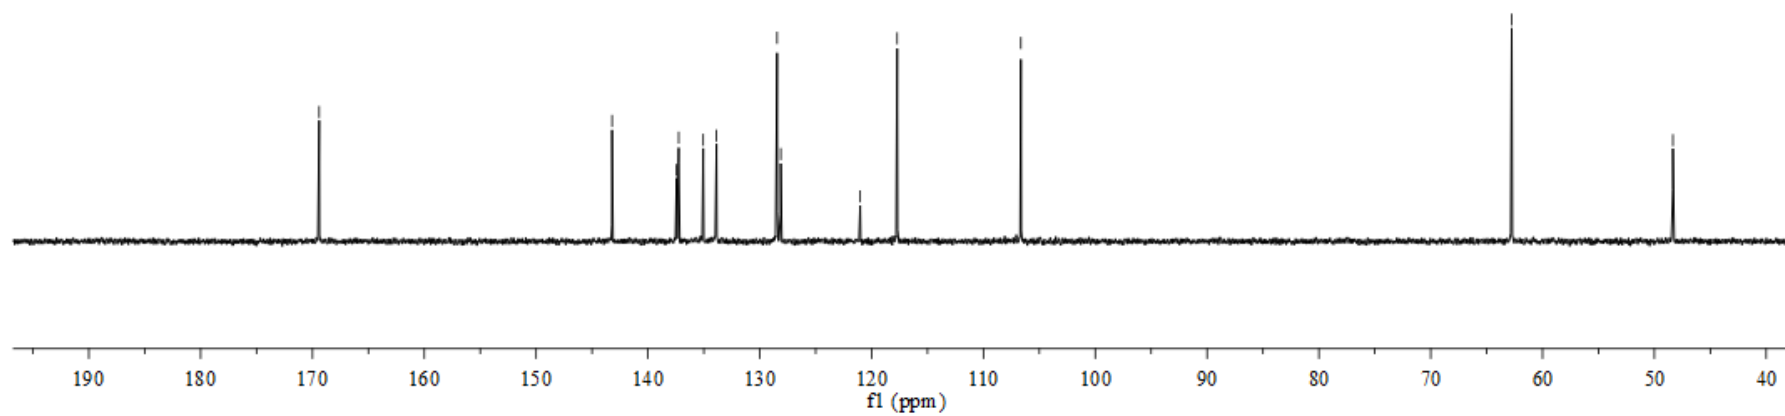

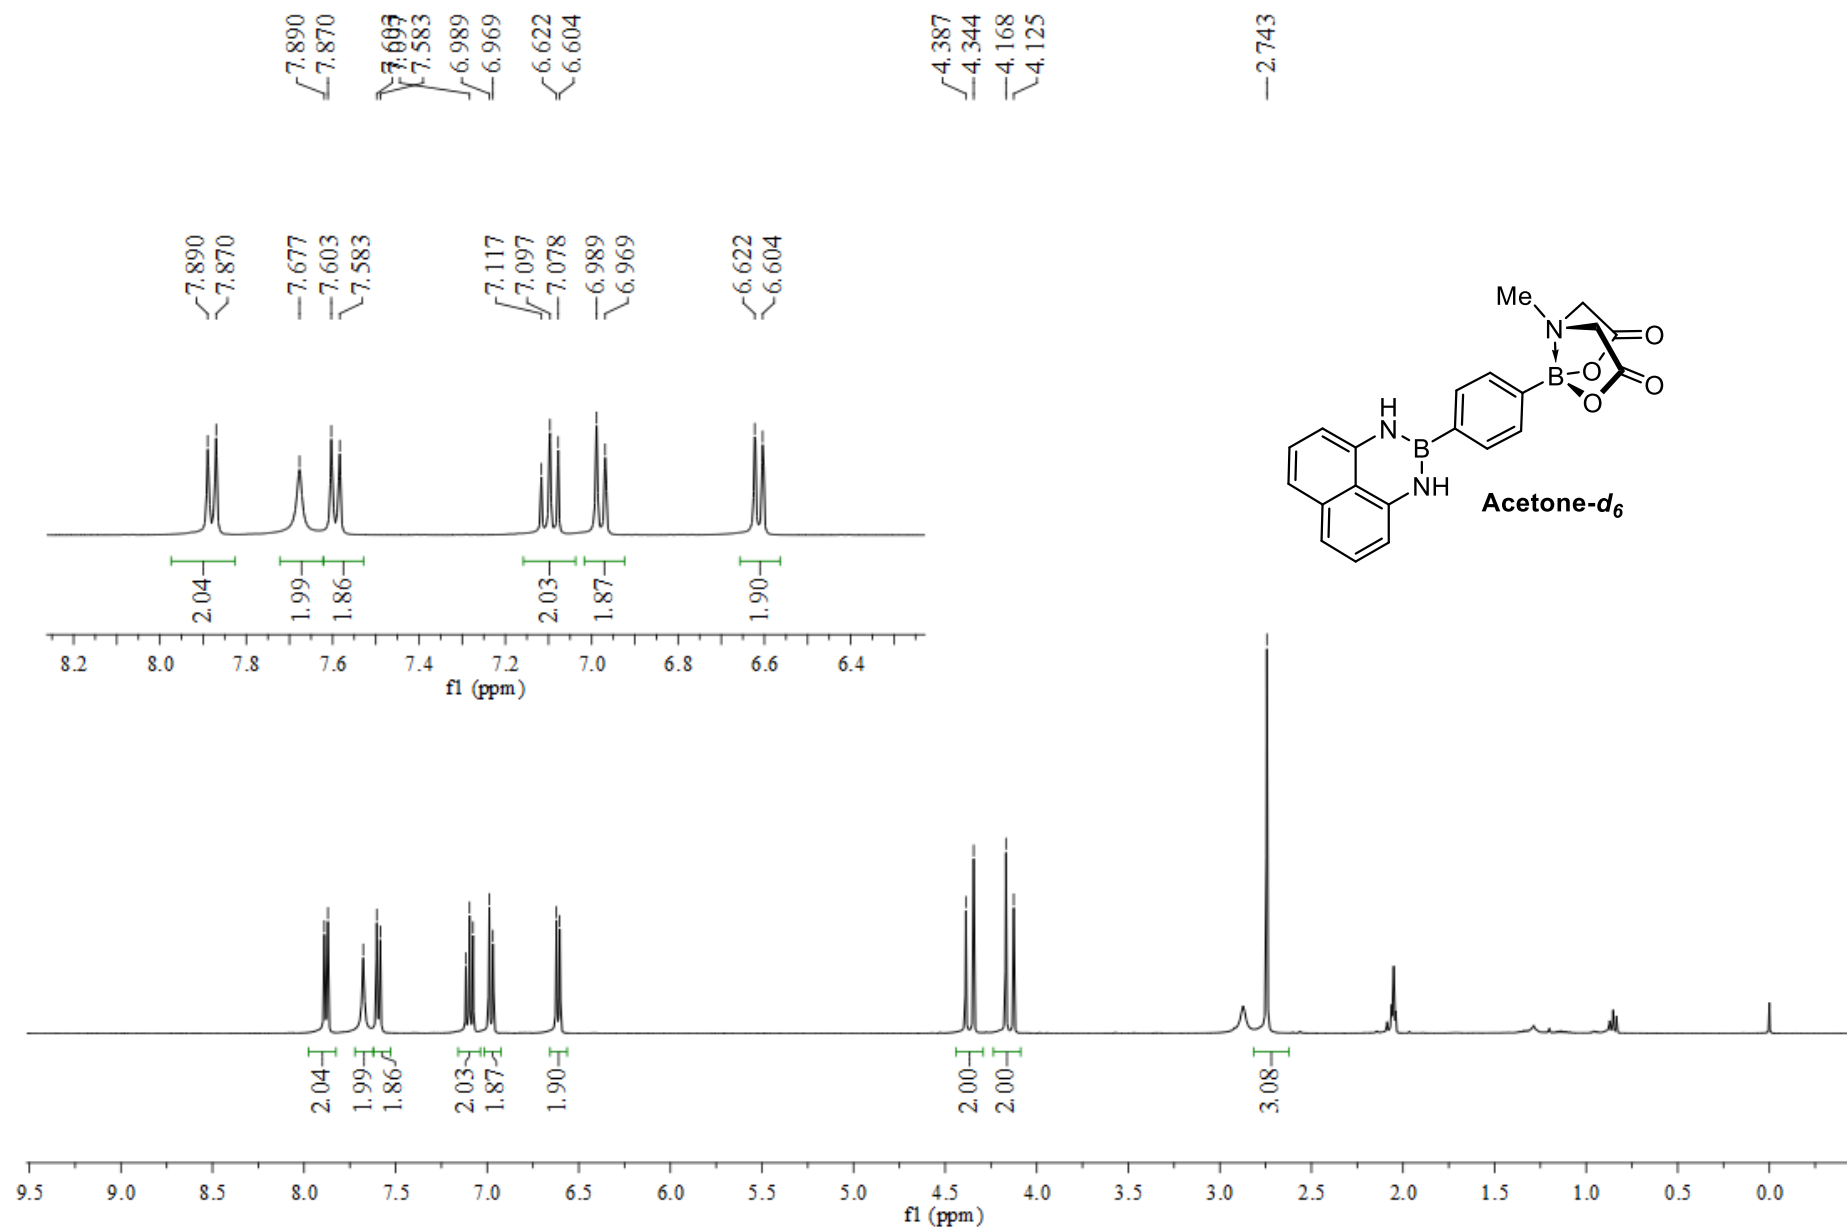

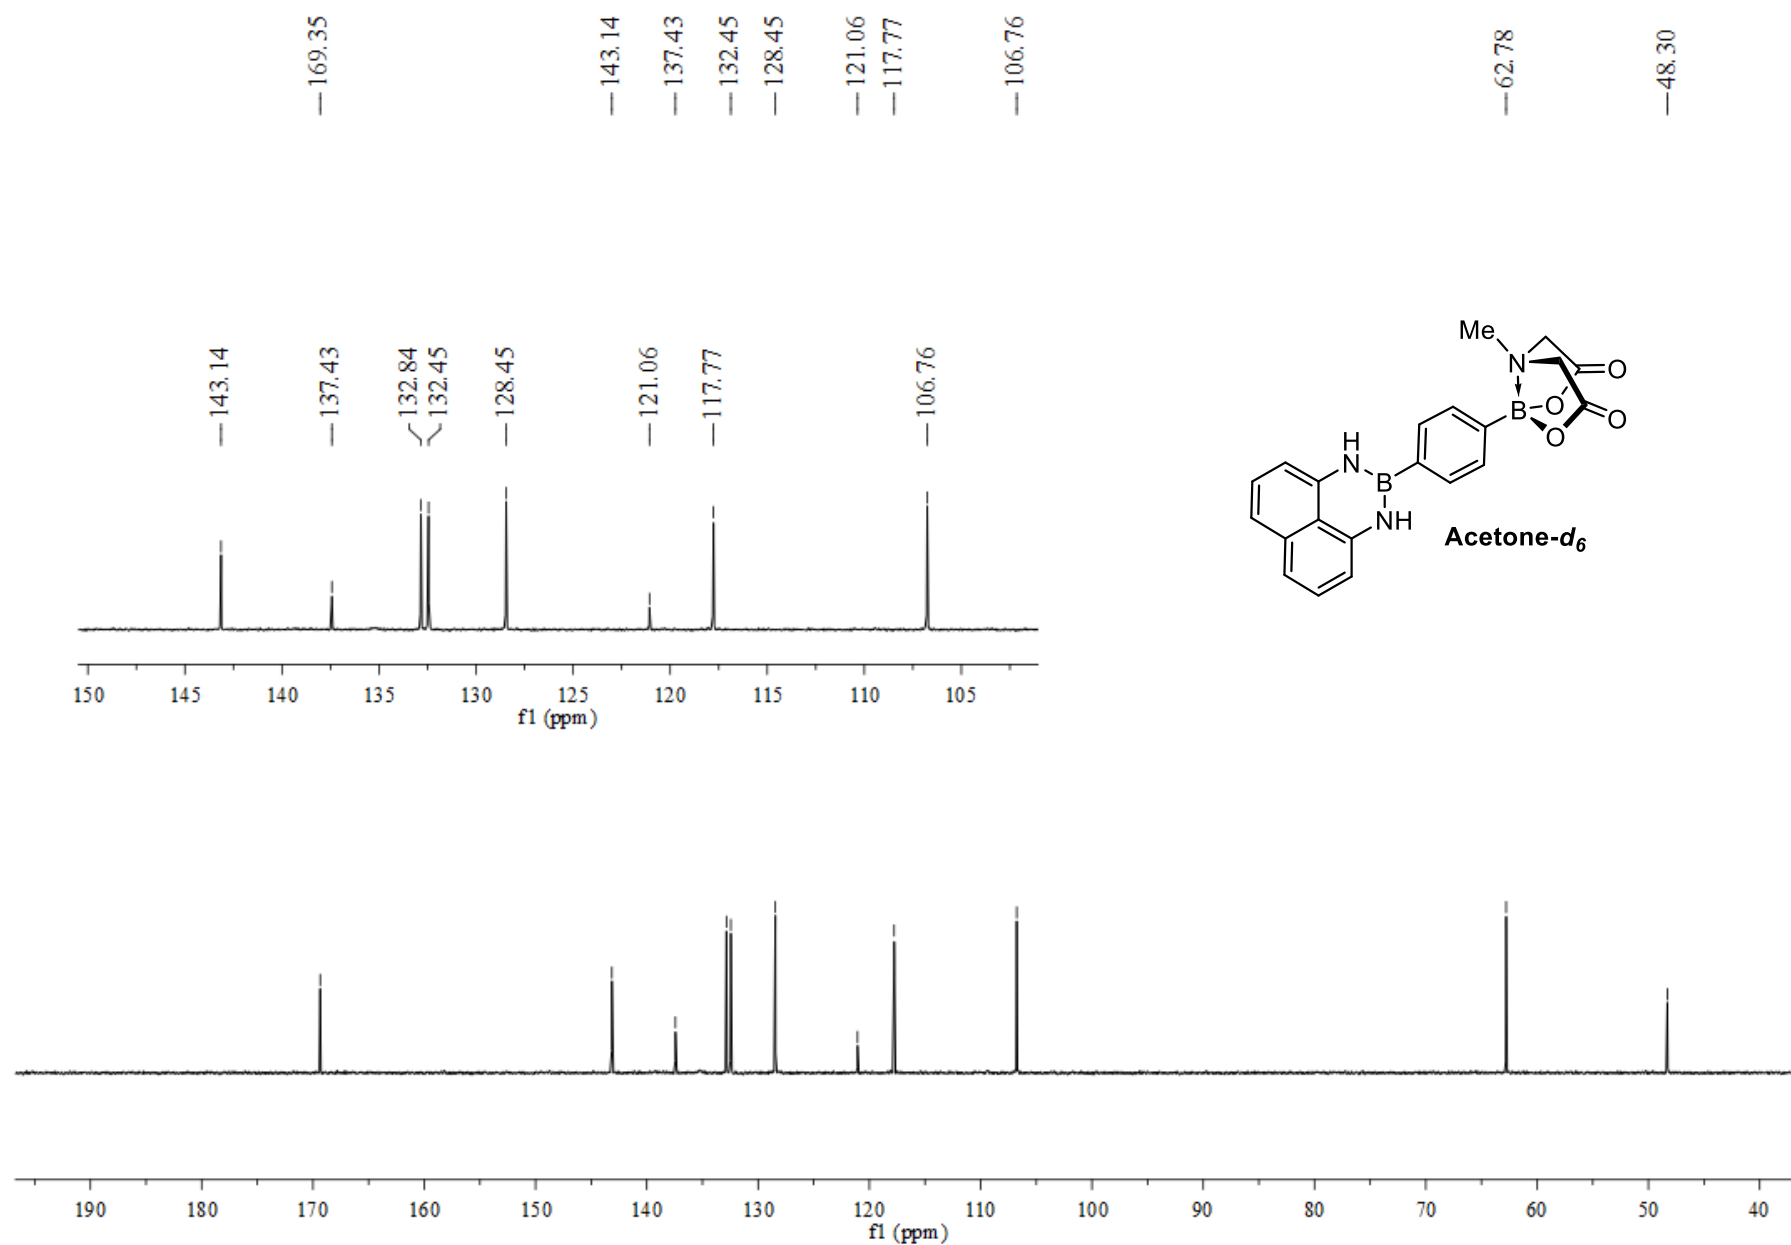

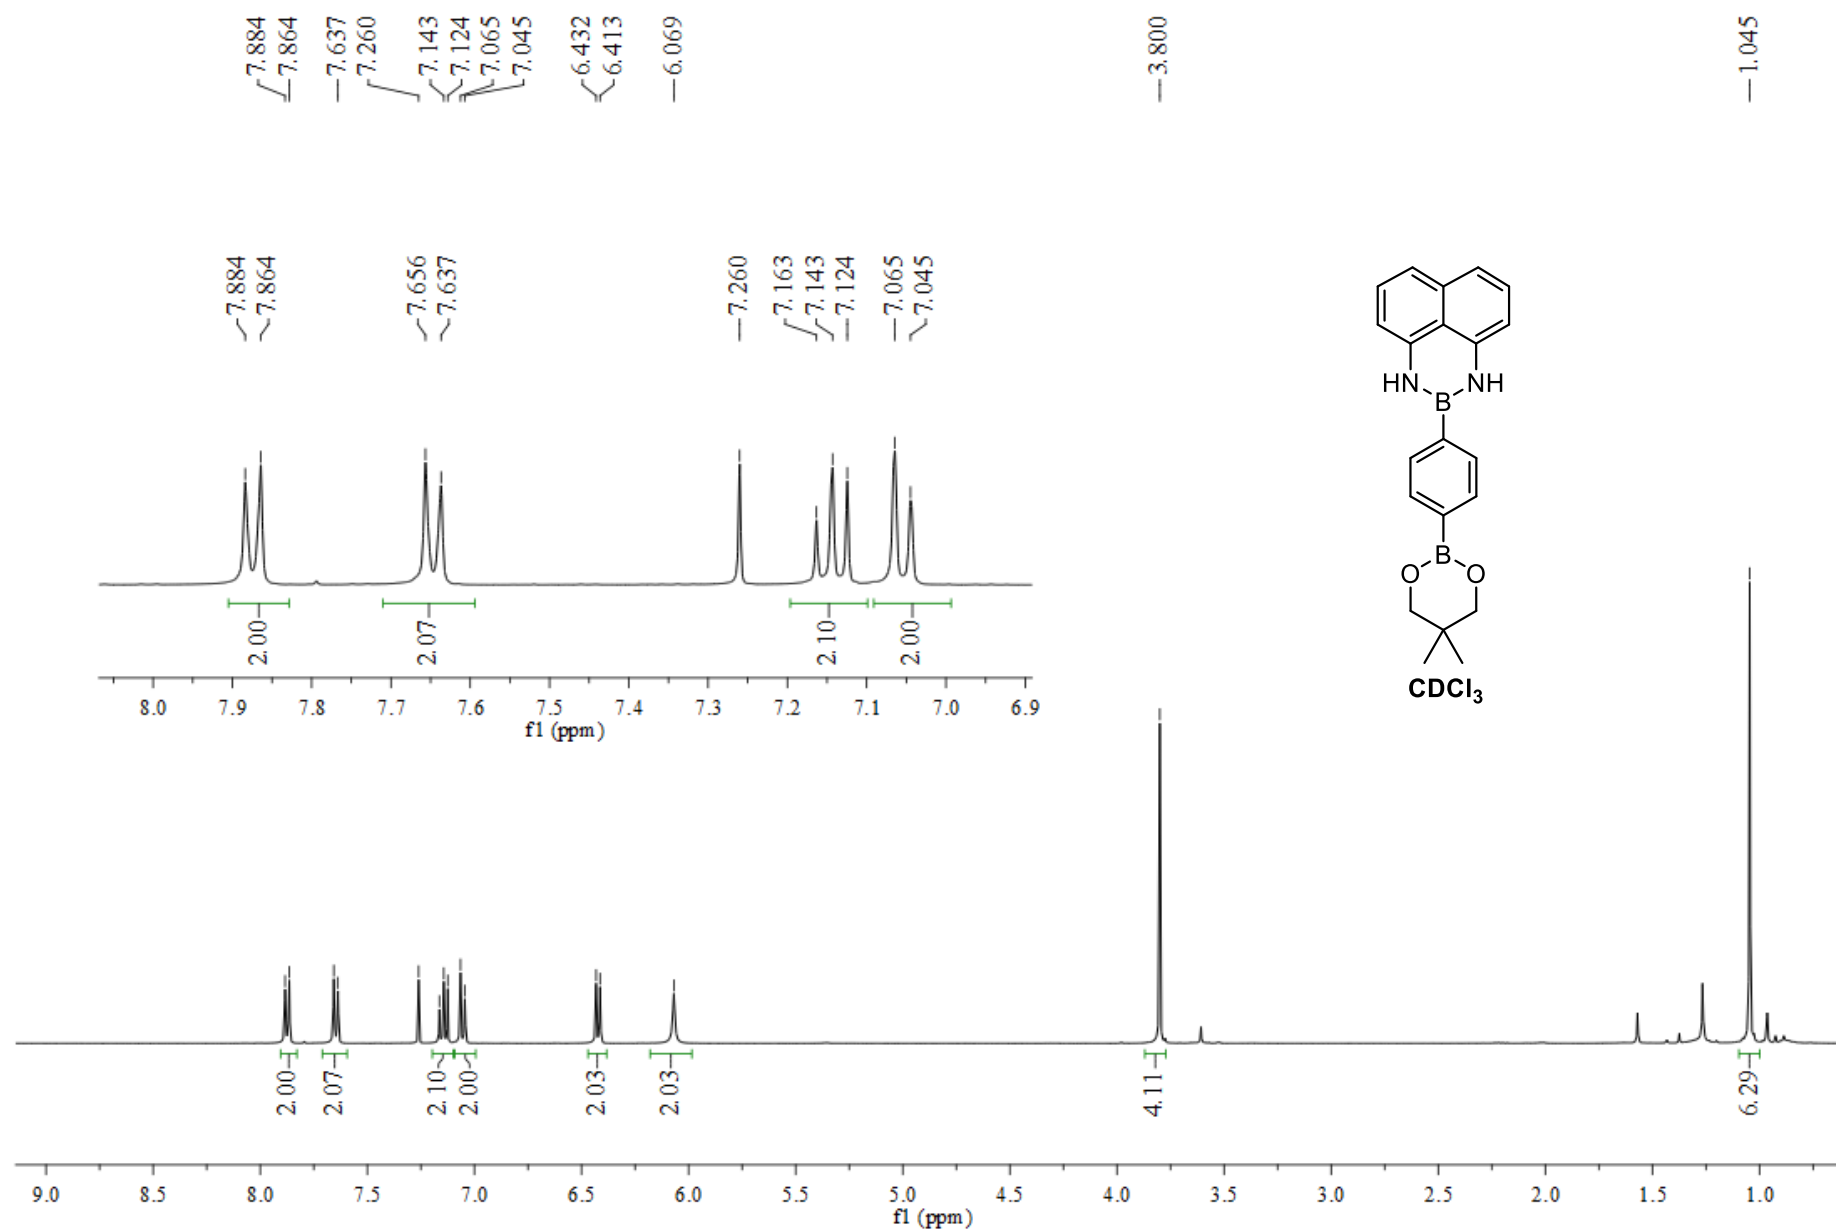

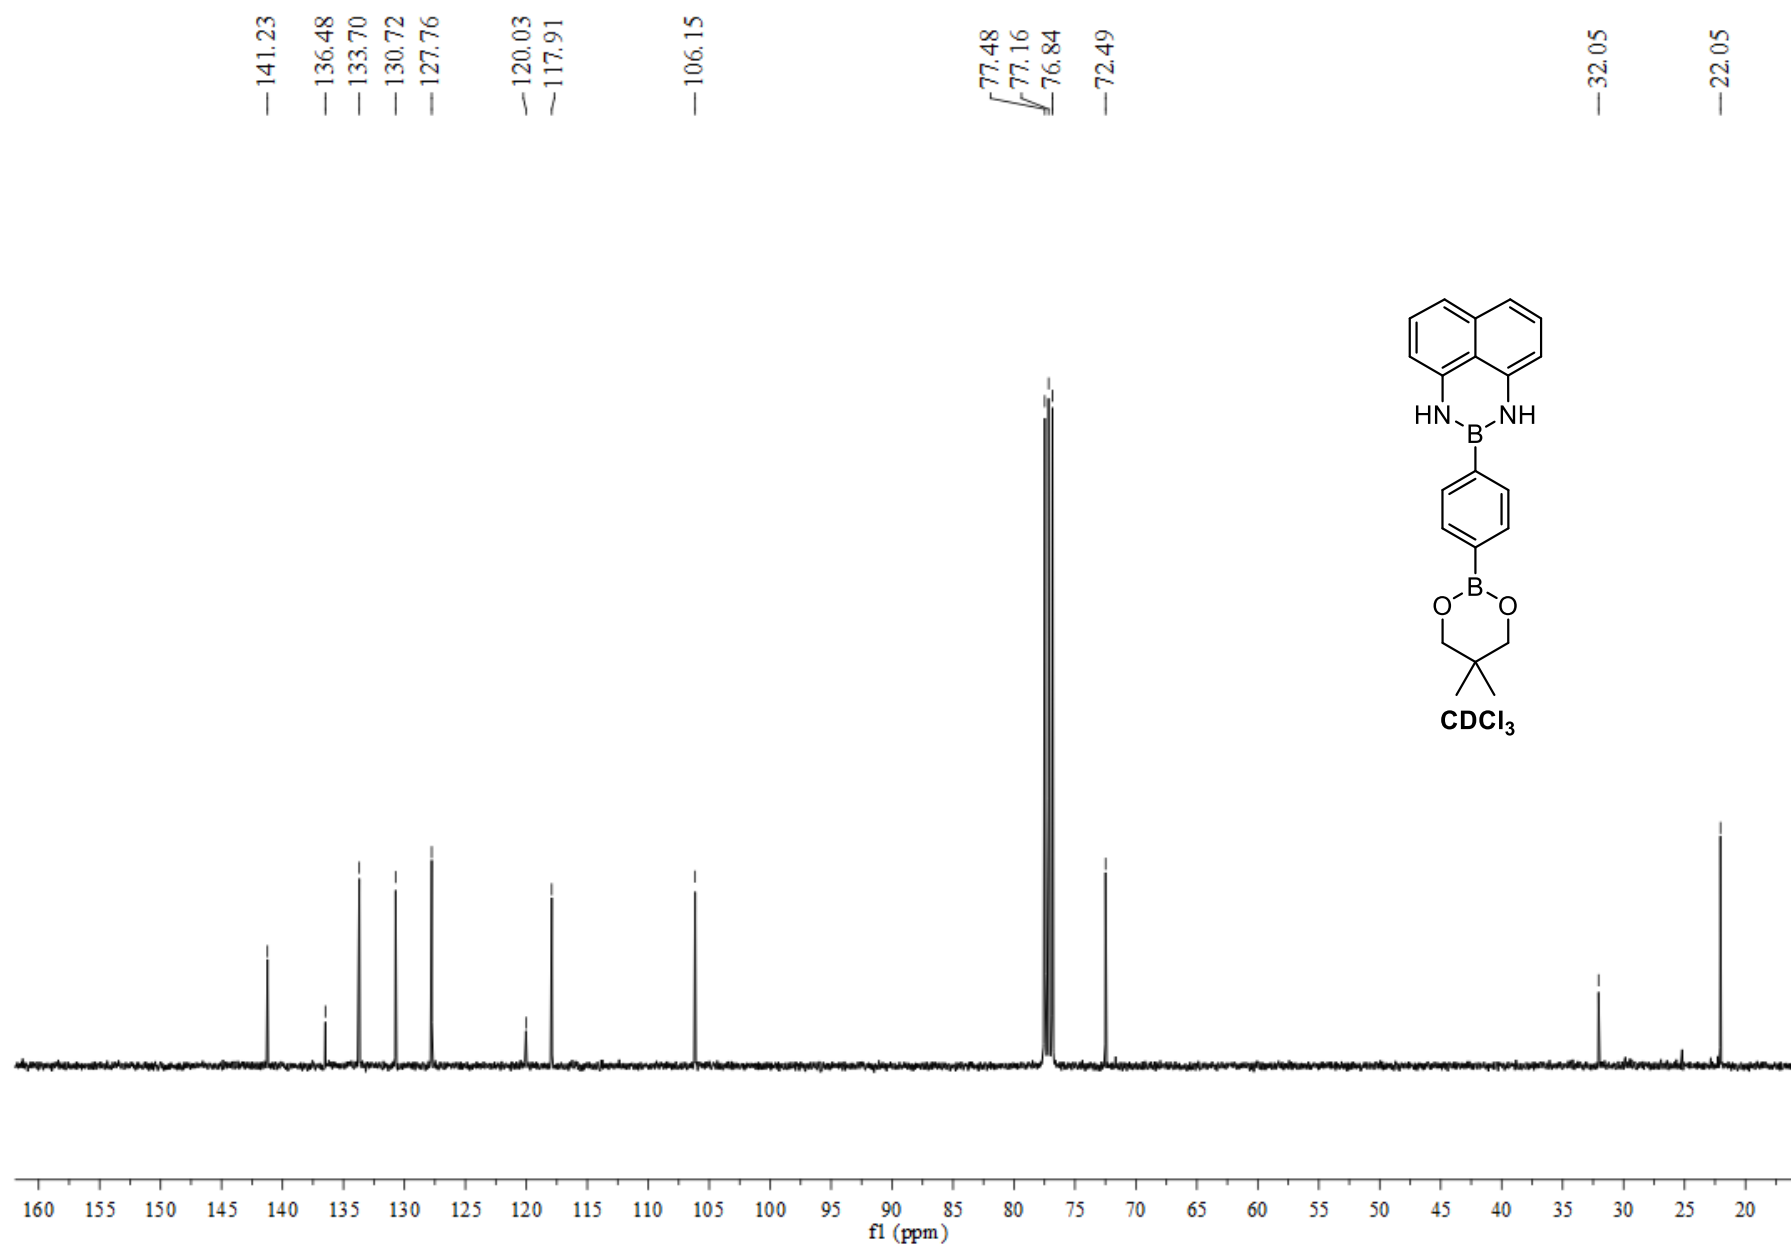



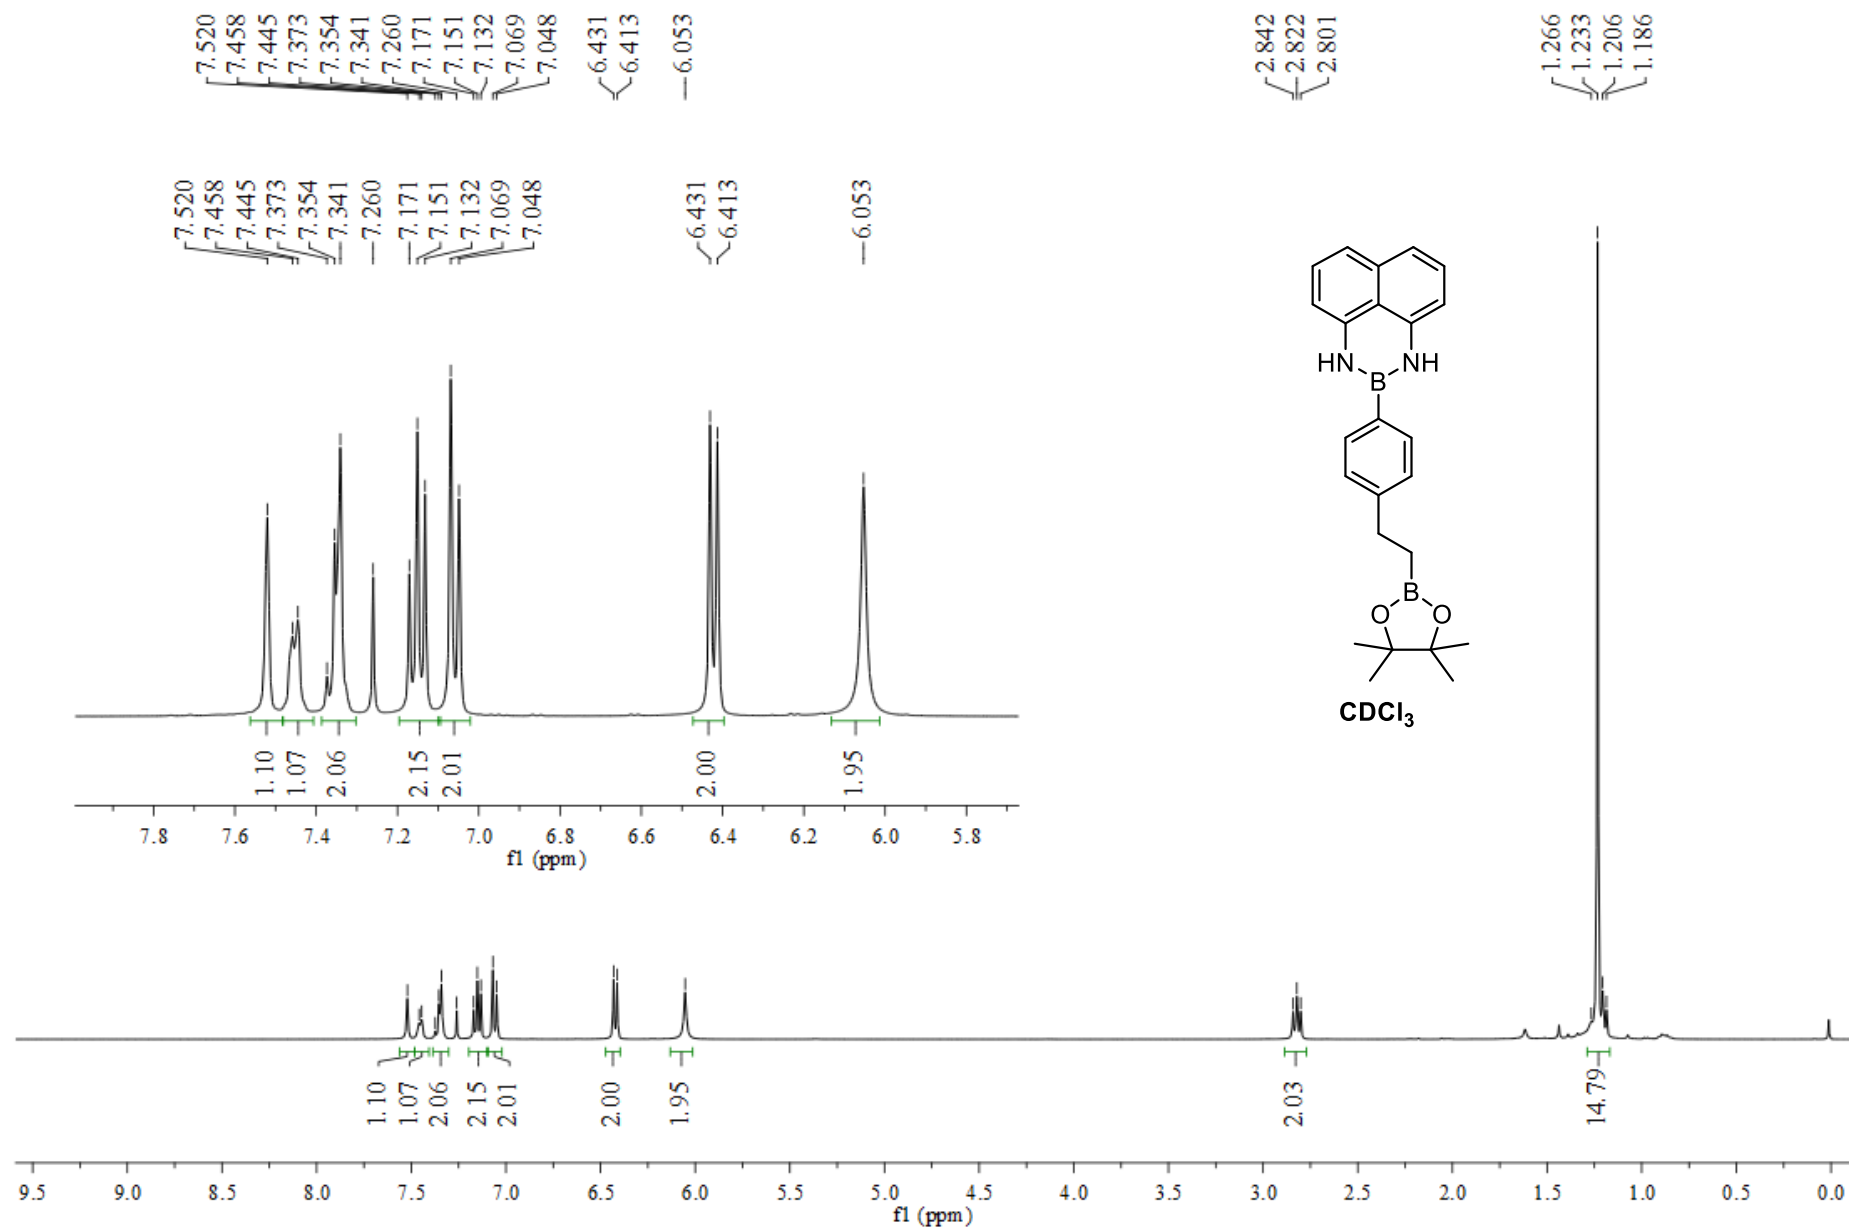

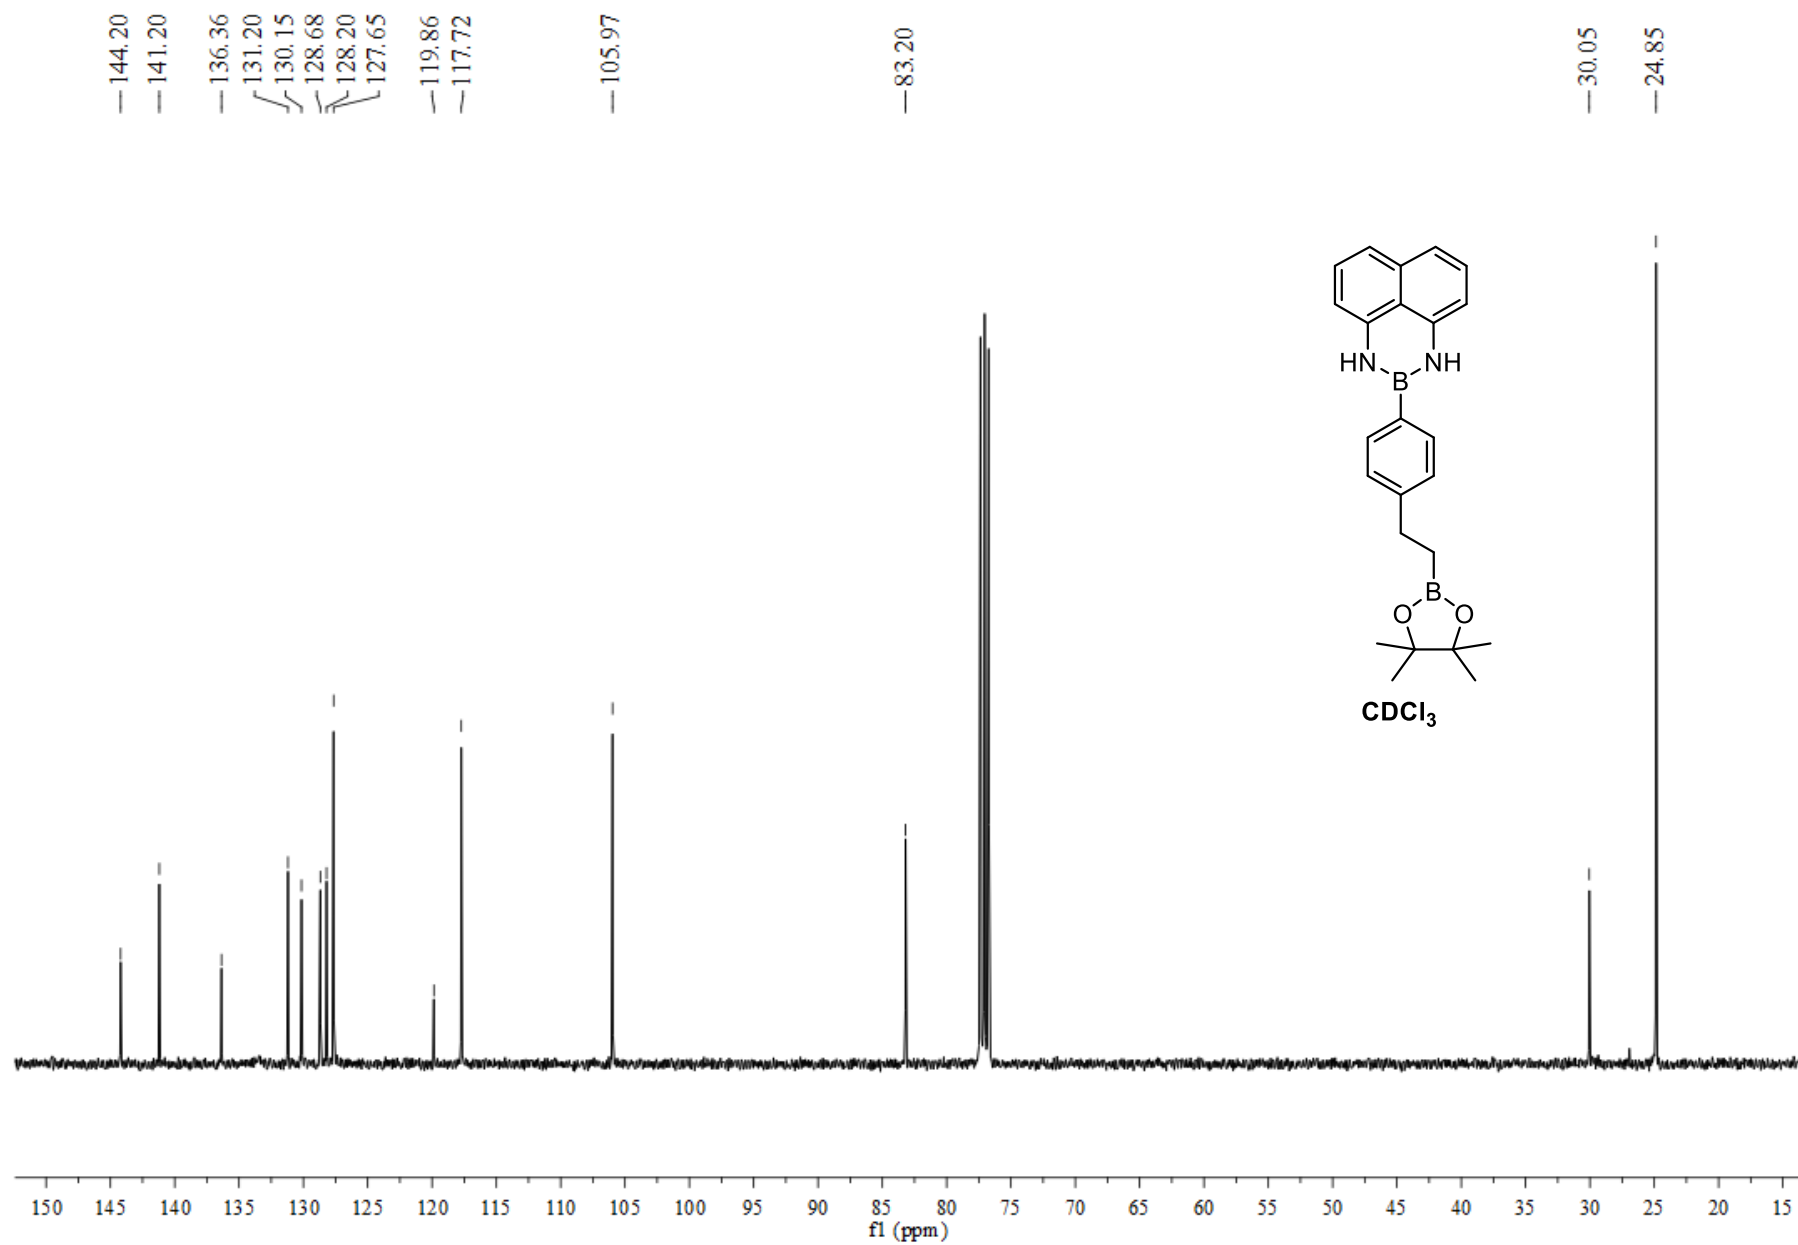

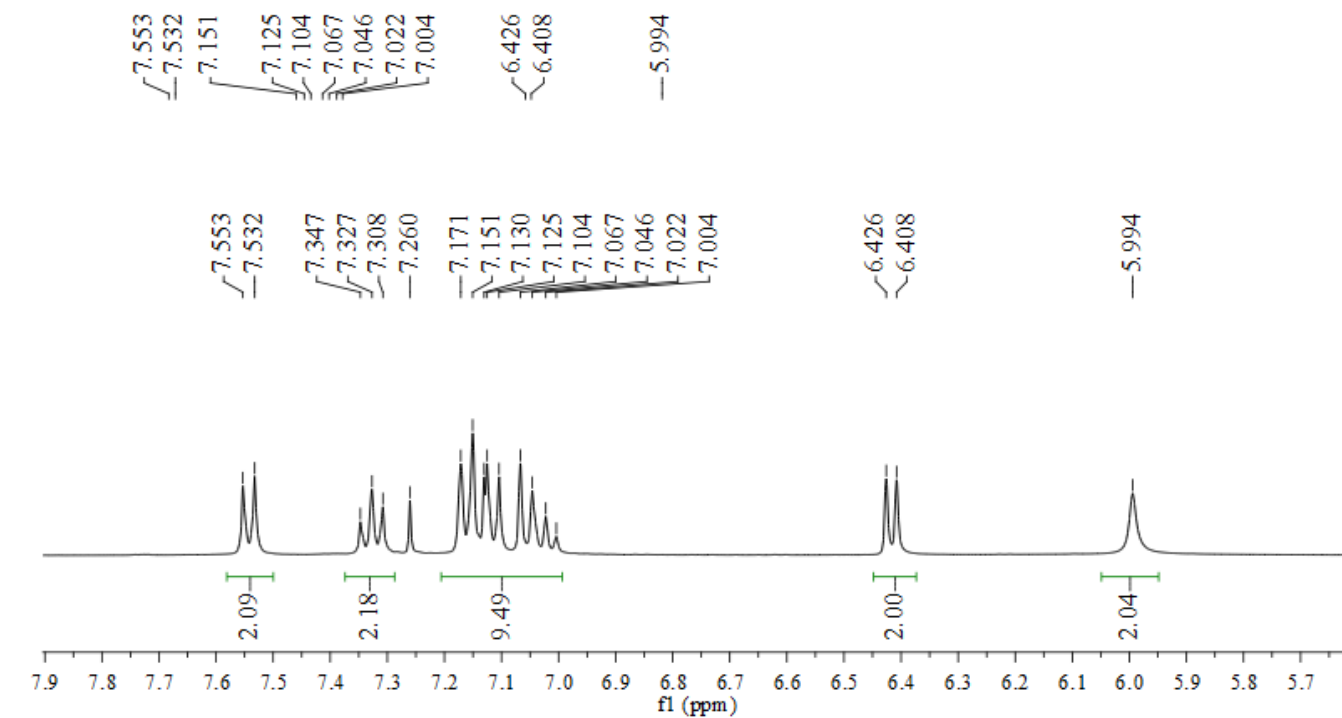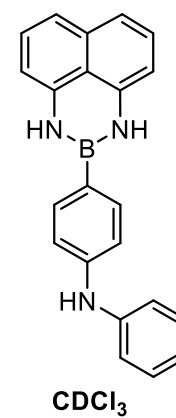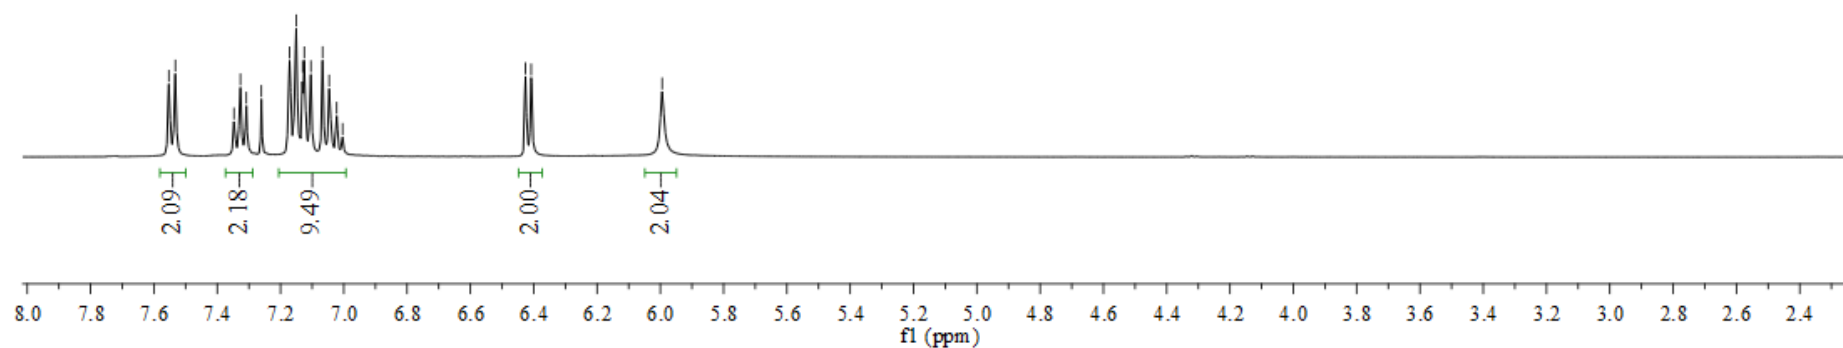

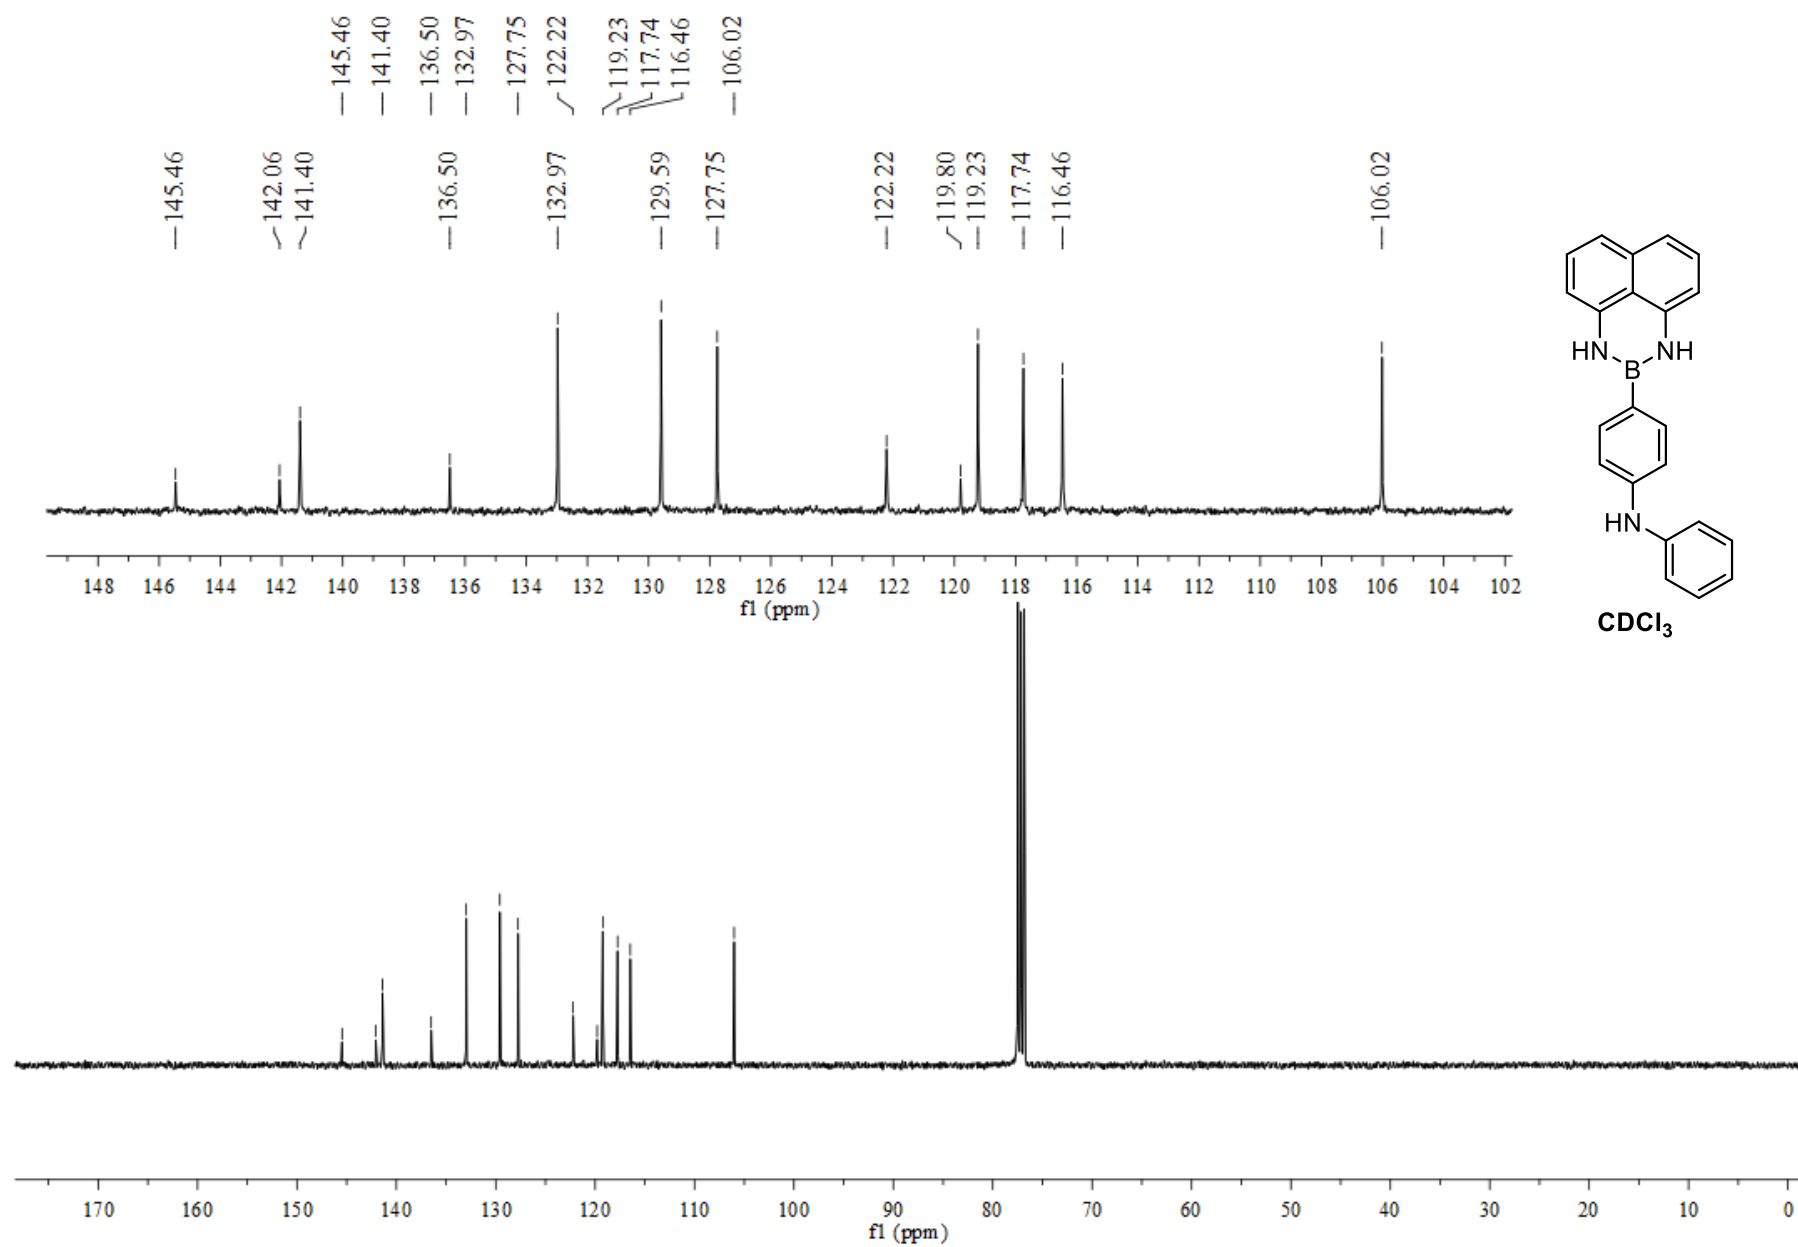

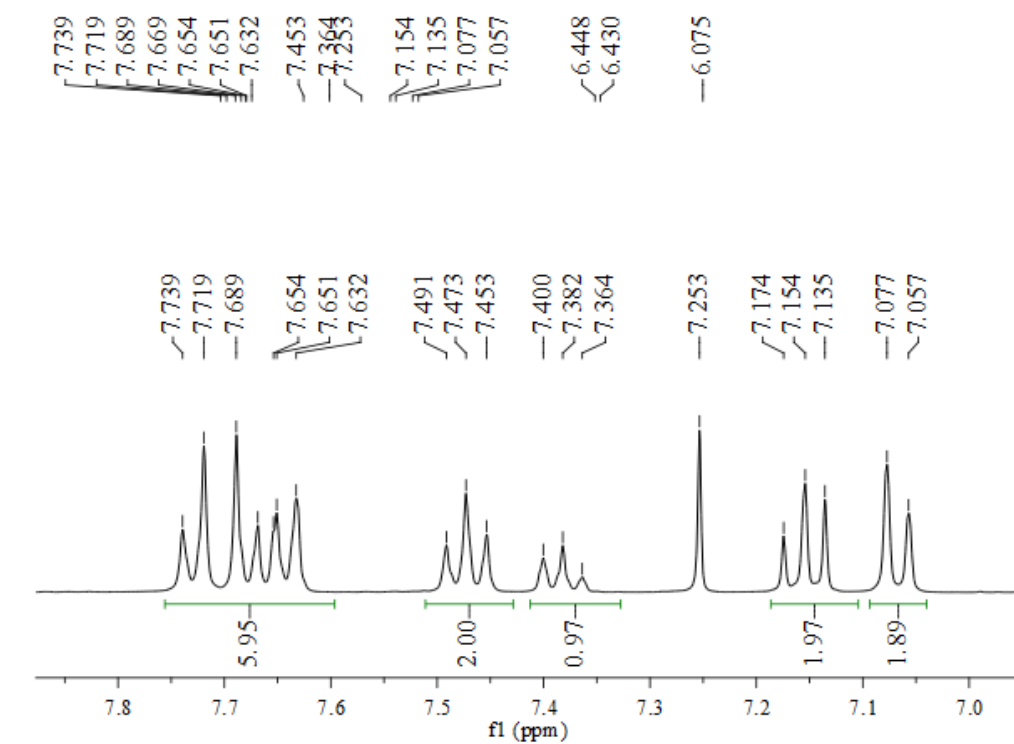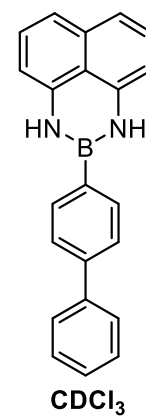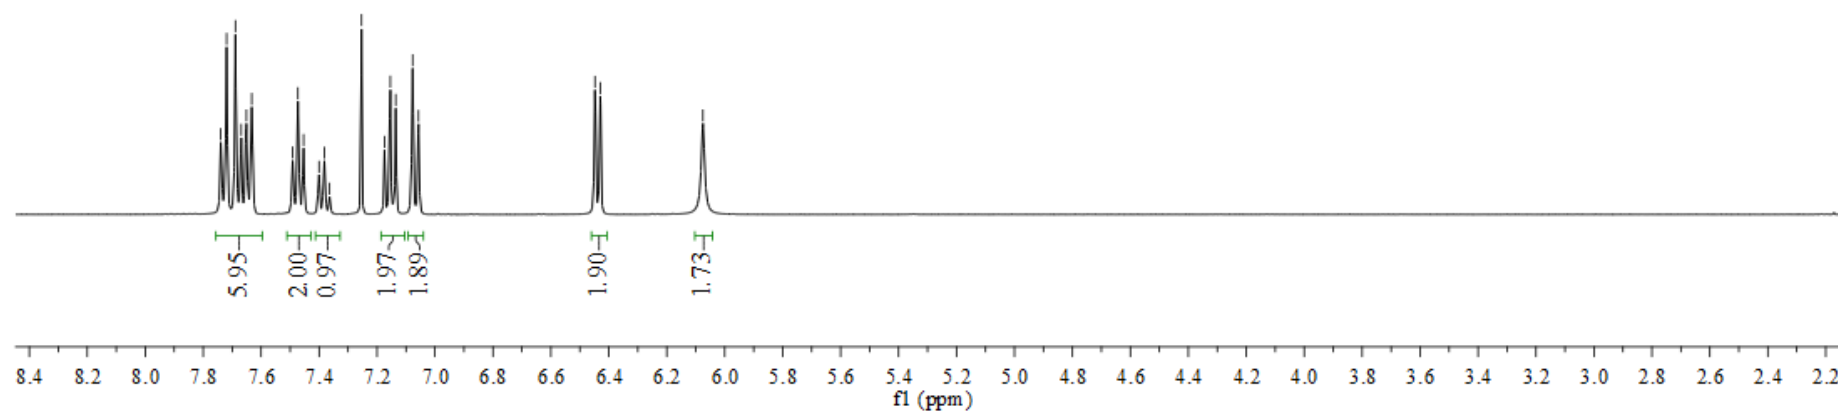

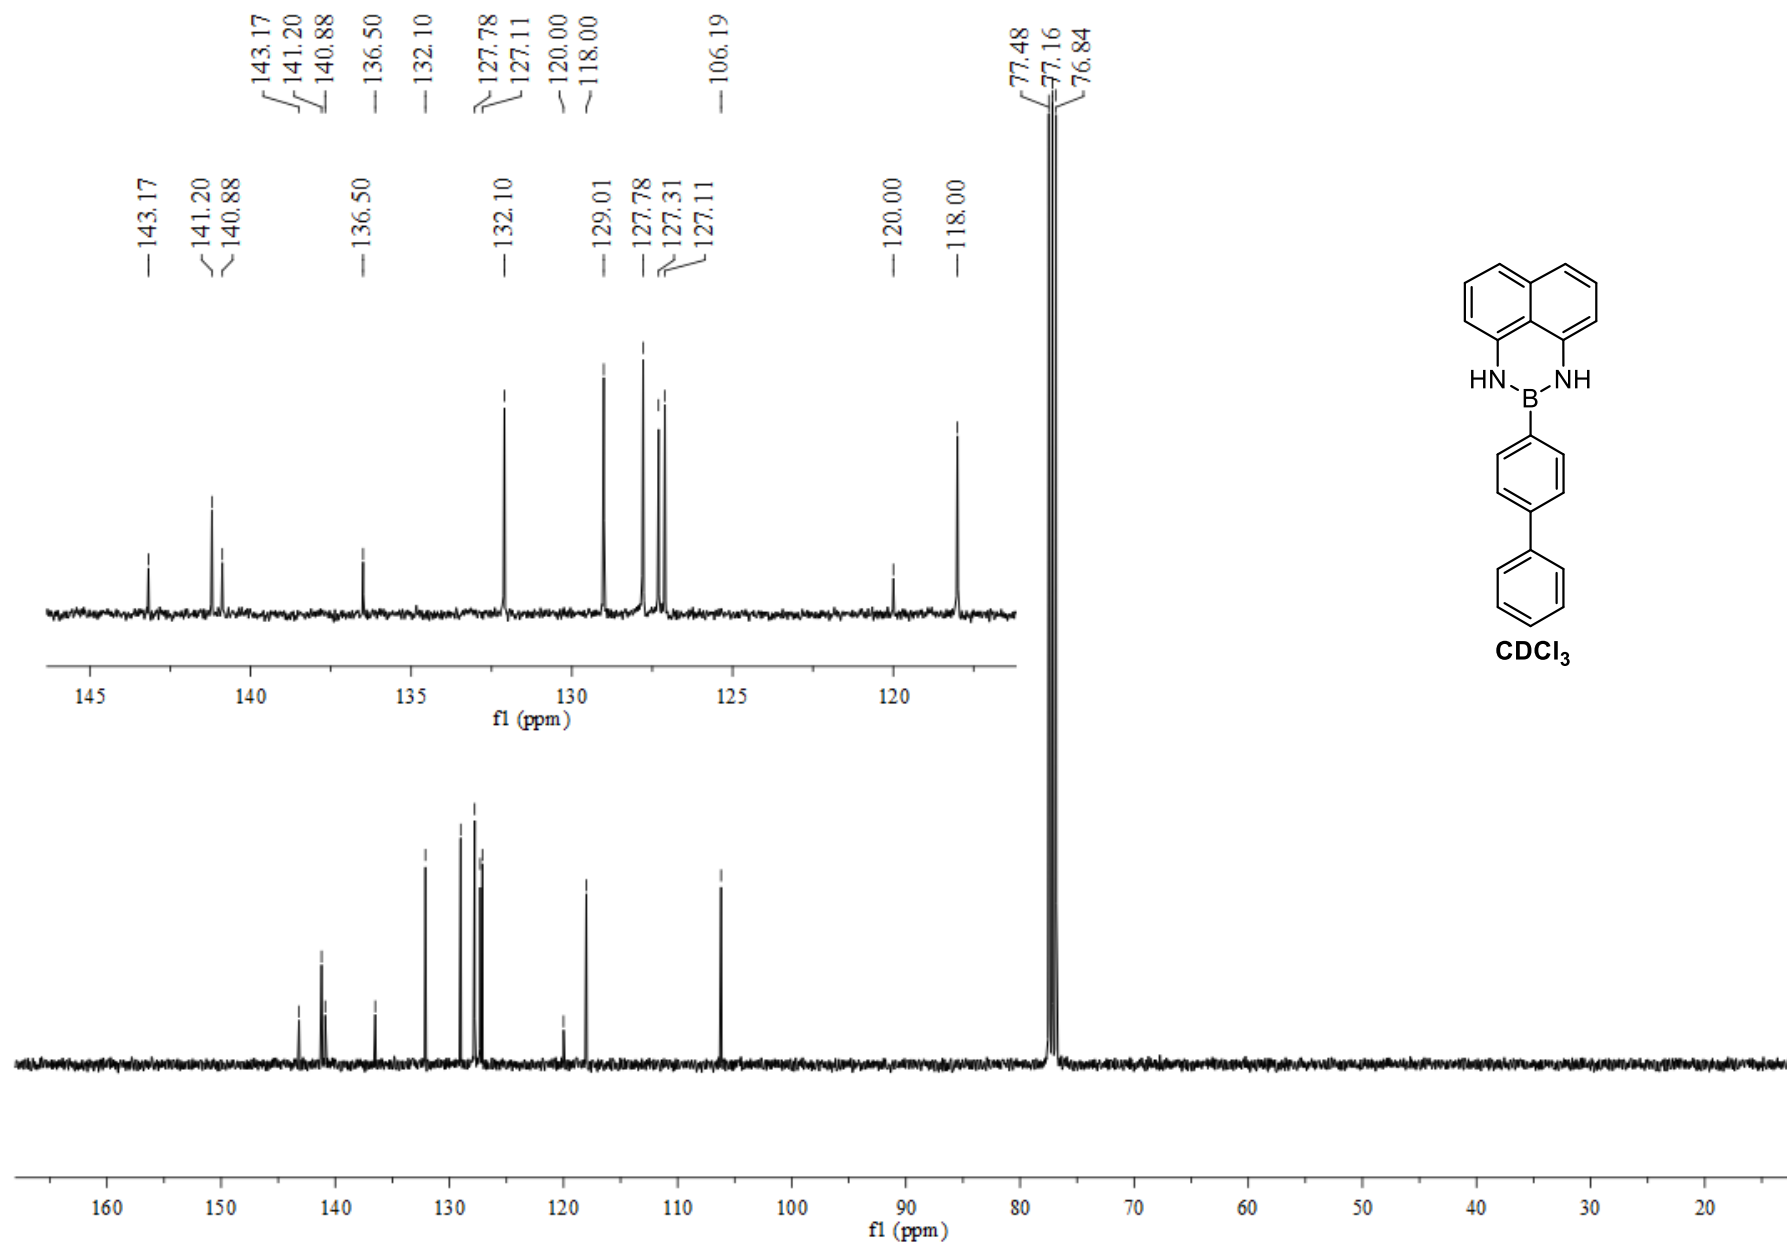

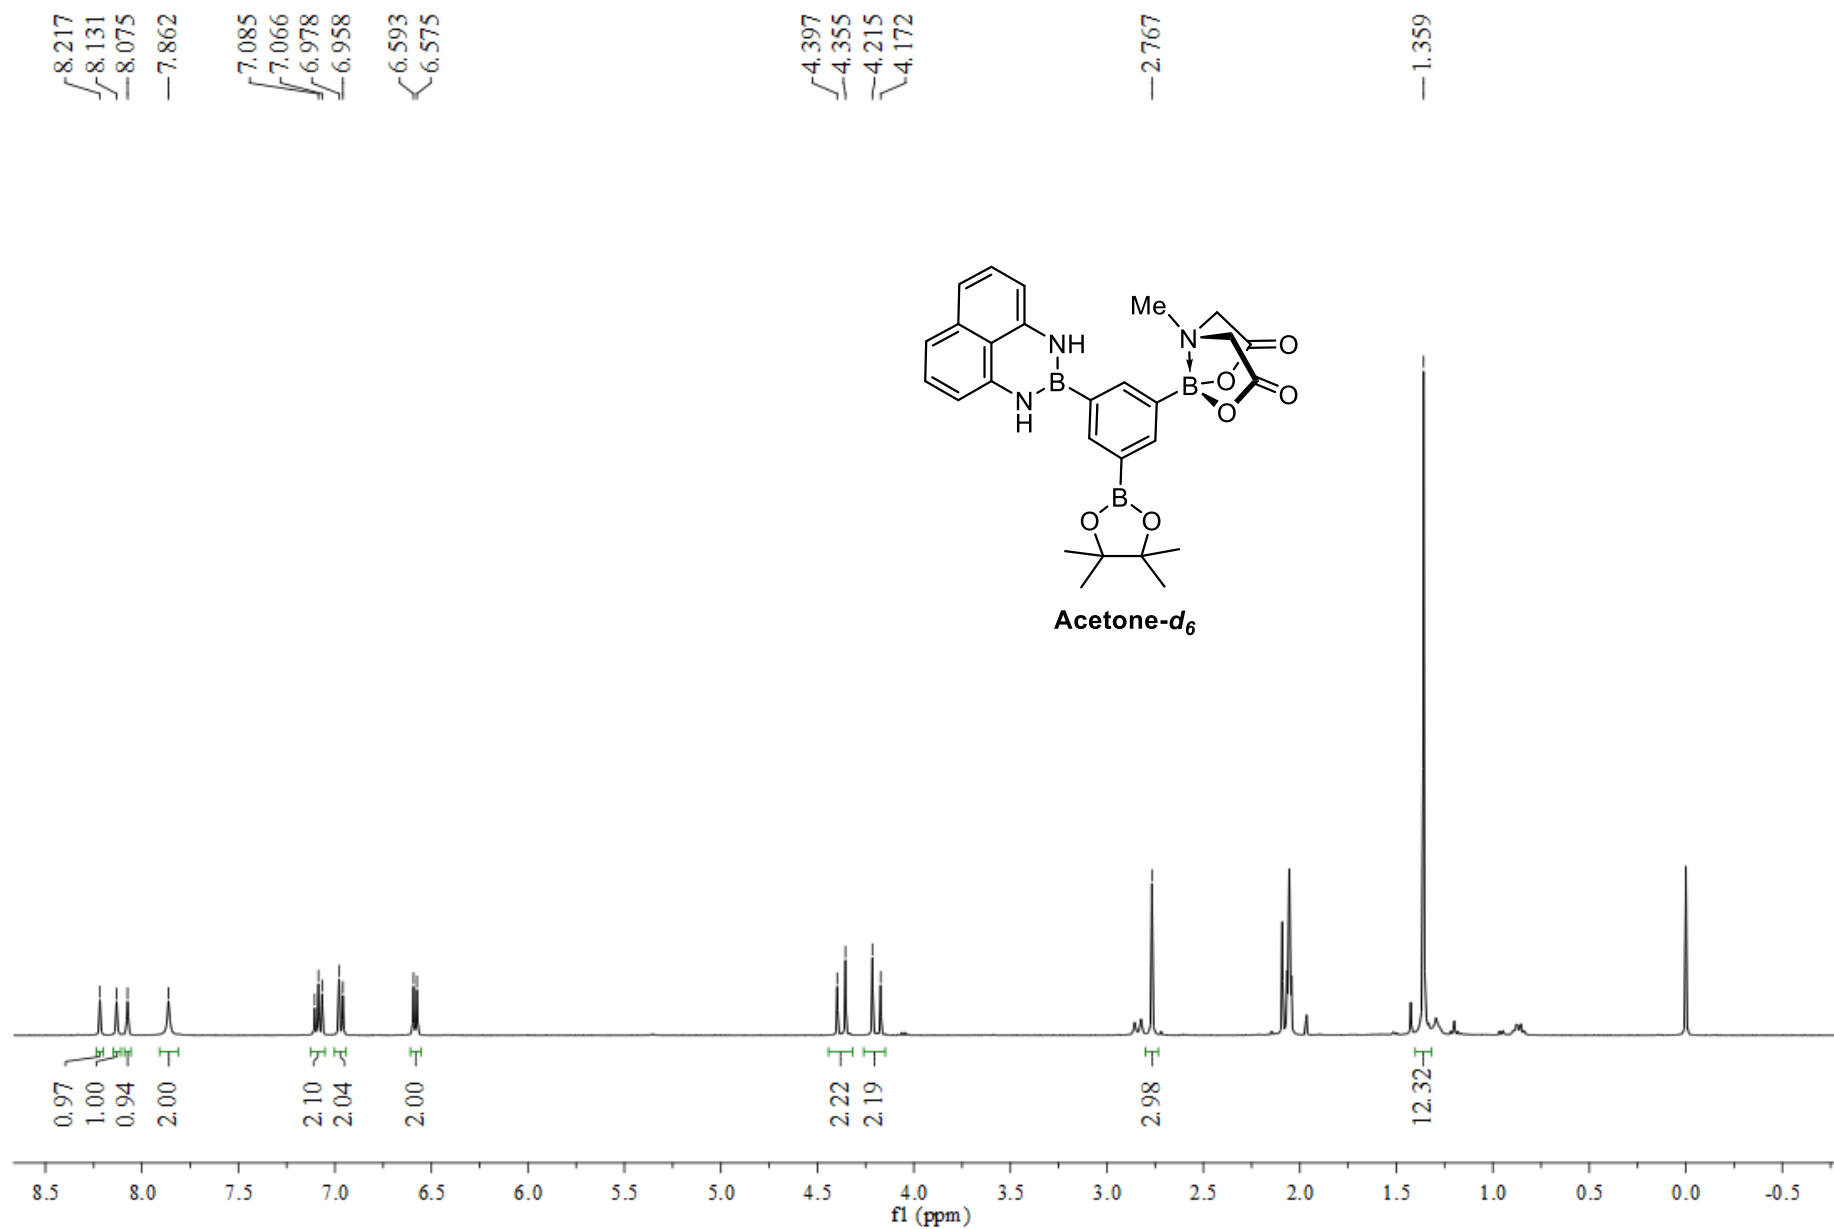

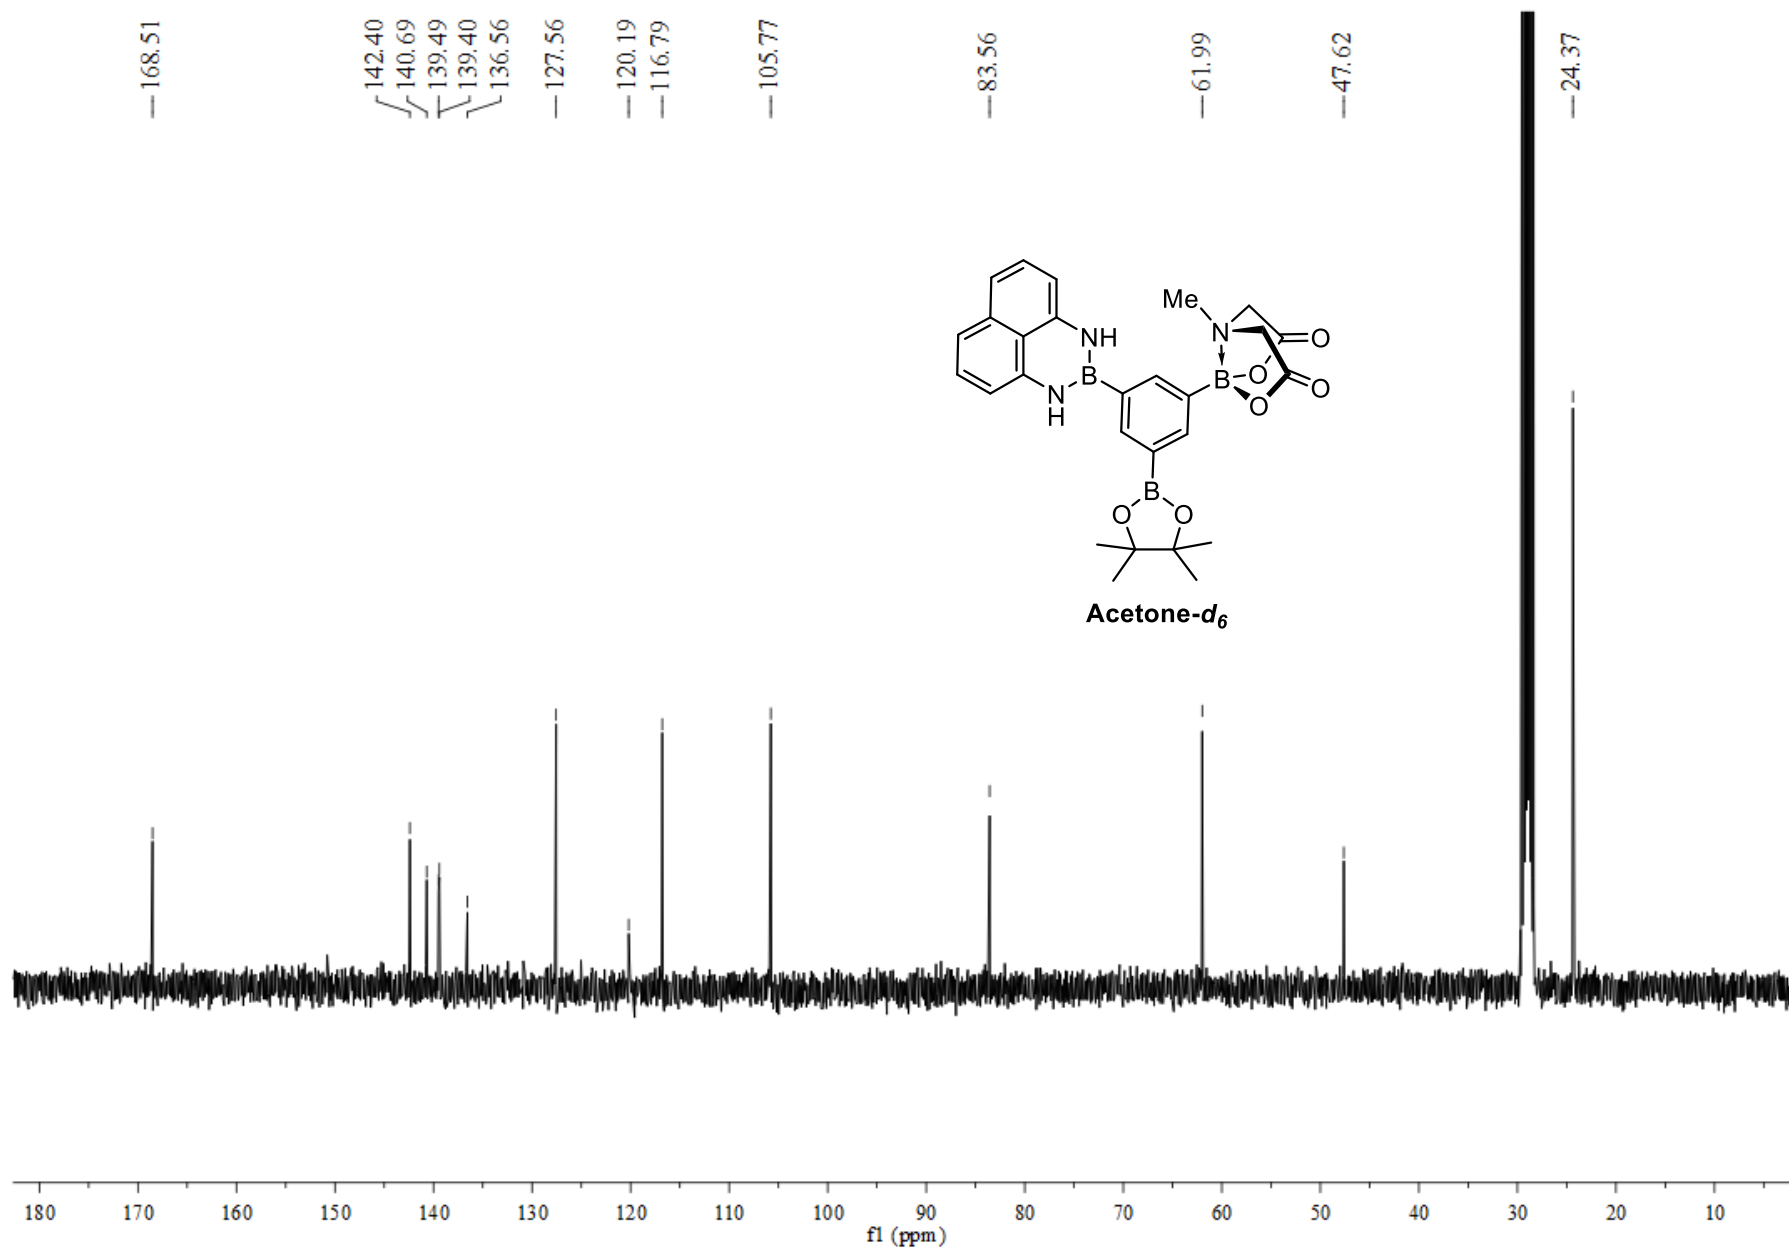

Supplement: c5cc00231a1.pdf [file c5cc00231a1.pdf]
